# Supplementary material for: Printed magnetoresistive sensors for recyclable magnetoelectronics
Source: Royal Society of Chemistry journal article supplement (doi:10.1039/d4ta02765e), 2024-01-01
Supplement: d4ta02765e1.pdf [file d4ta02765e1.pdf]

Supplementary information:

## **Printed magnetoresistive sensors for recyclable magnetoelectronics**

Xiaotao Wang,<sup>‡a</sup> Lin Guo,<sup>‡a</sup> Olha Bezmertna,<sup>a</sup> Yuhan Wu,<sup>b</sup> Denys Makarov<sup>\*a</sup> and Rui Xu<sup>\*a</sup>

<sup>a</sup>Helmholtz-Zentrum Dresden-Rossendorf e.V., Institute of Ion Beam Physics and Materials Research, Bautzner Landstrasse 400, 01328 Dresden, Germany. Email: r.xu@hzdr.de; d.makarov@hzdr.de

<sup>b</sup>School of Environmental and Chemical Engineering, Shenyang University of Technology, Shenyang, China

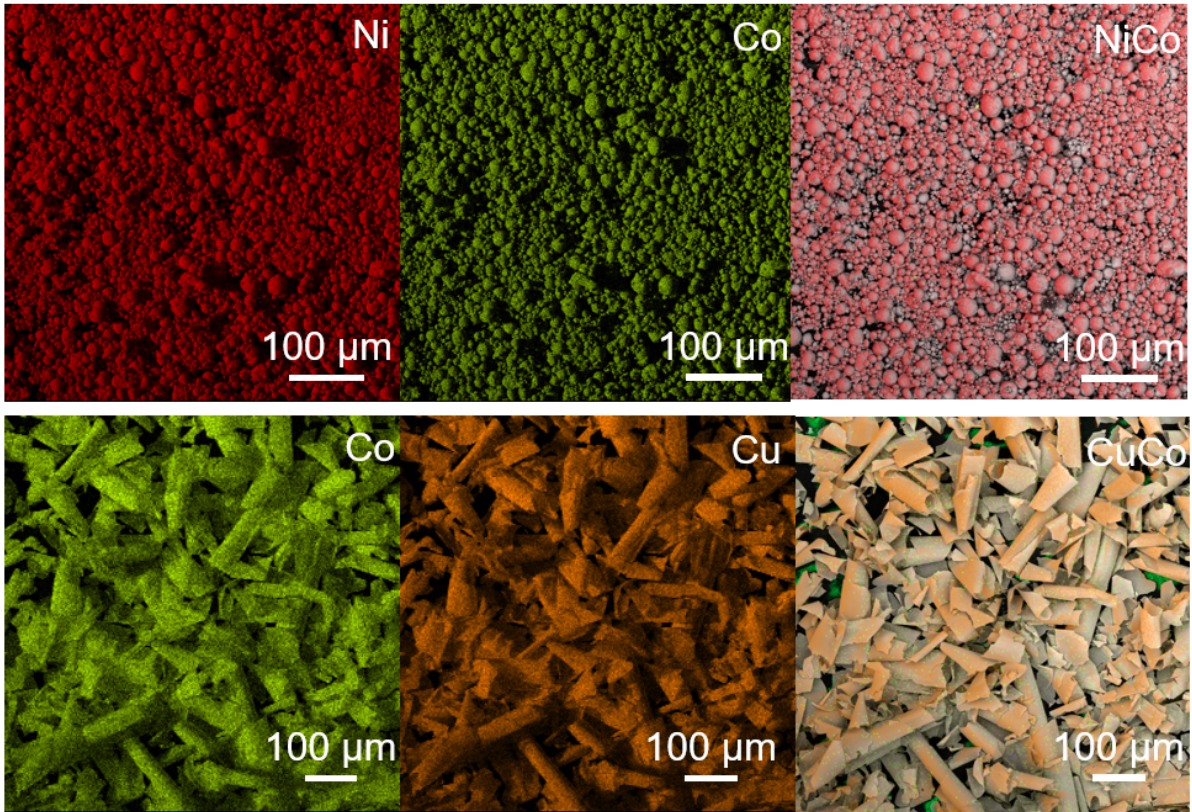

Fig. S1. EDX element mapping of (a)  $\text{Ni}_{97}\text{Co}_3$  microparticles, (b)  $[\text{Co}/\text{Cu}]_{50}$  multilayer microflakes.

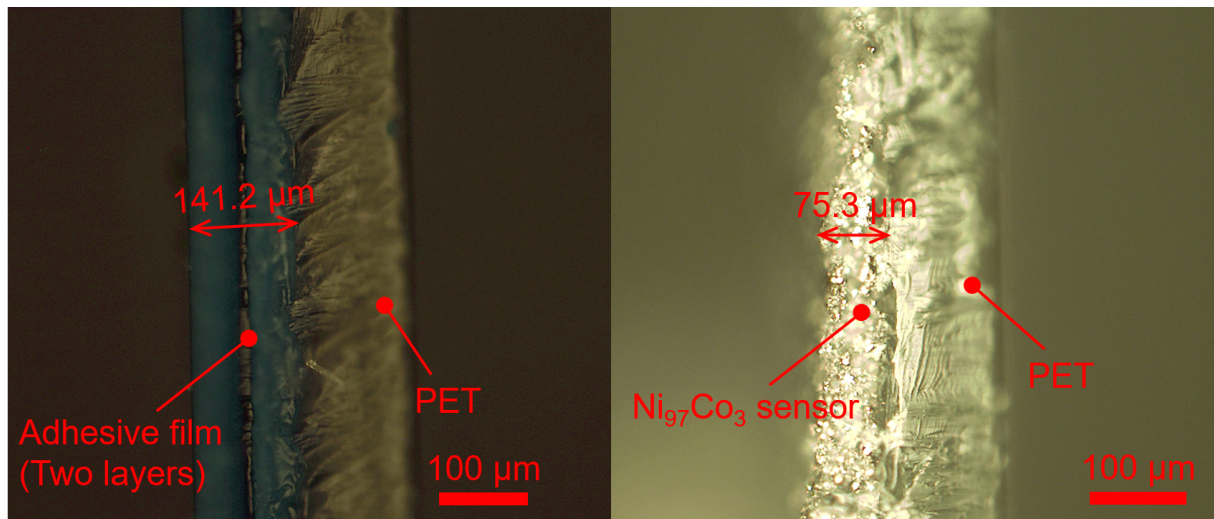

Fig. S2. Optical microscope images of the printed sensor: (left) before and (right) after curing.

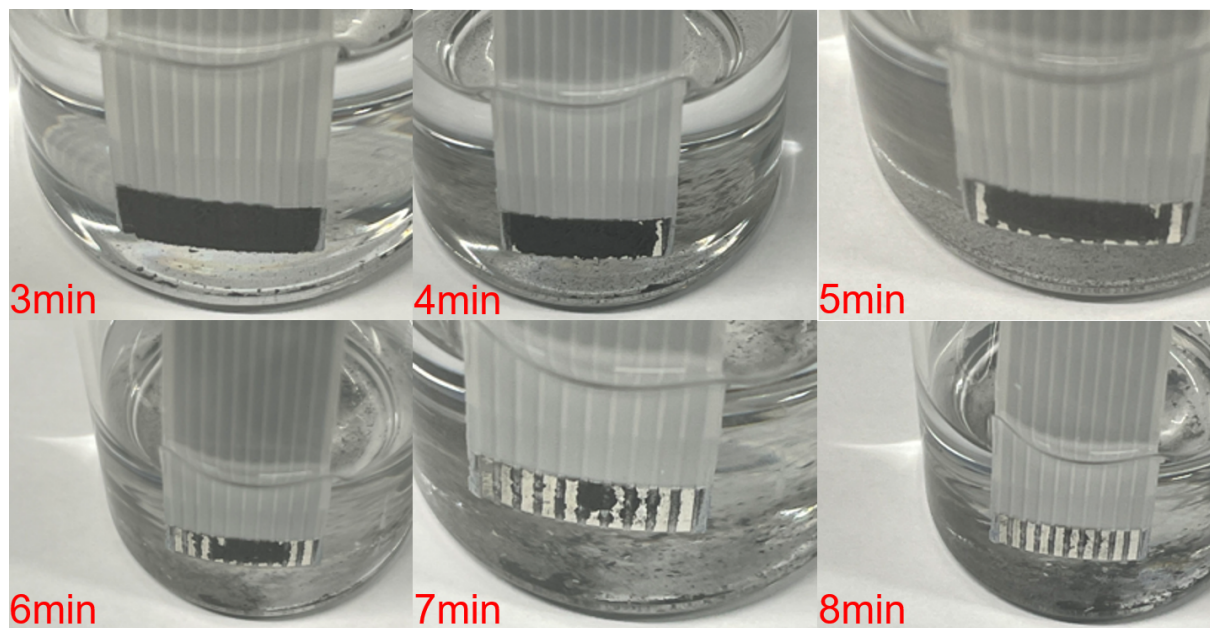

Fig. S3. The decomposition process of the printed sensor in acetone.

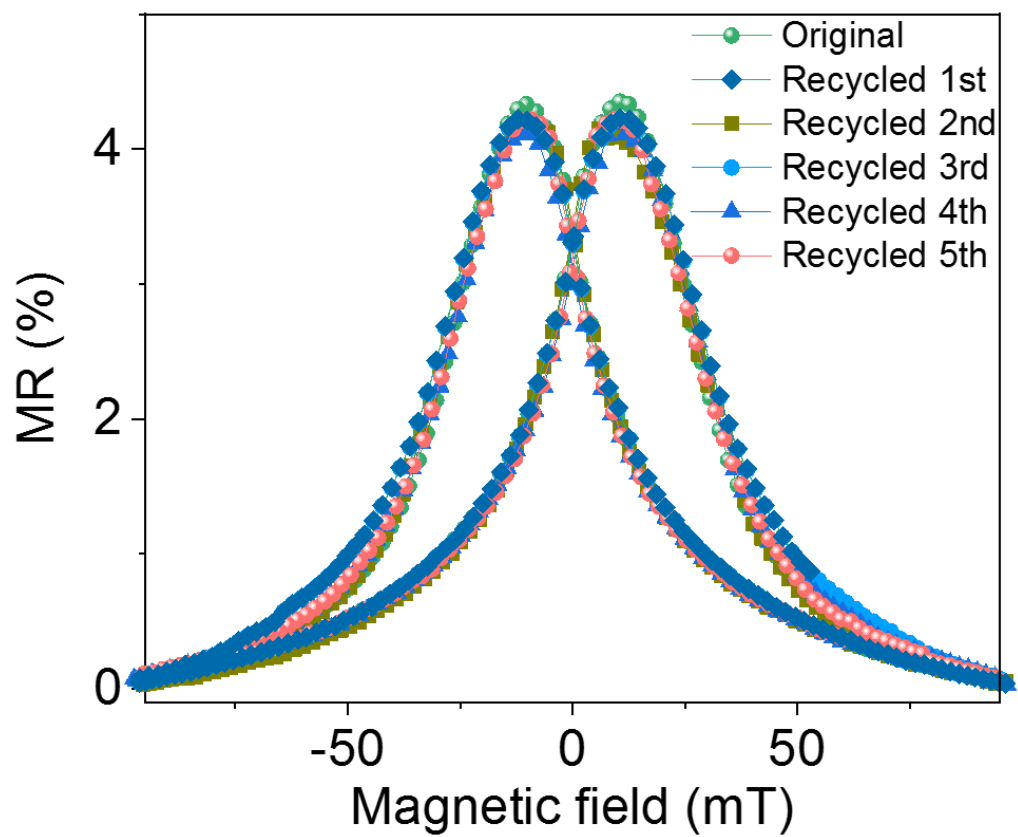

Fig. S4. Variation of the MR performance during five recycling experiments.

Table S1. Classification of the adhesion force. According to the ASTM D3359 standard, we evaluated the adhesion force of magnetic field sensors based on  $[\text{Co}/\text{Cu}]_{50}$  microflakes and  $\text{Ni}_{97}\text{Co}_3$  microparticles using the tape test method. We tested the adhesion force of the printed sensors on various surfaces. It was found that adhesion force is influenced by factors such as substrate material, surface roughness, and magnetic filler concentration.

|                                                  | Glass Sheet | PET Film | Aluminum Plate |
|--------------------------------------------------|-------------|----------|----------------|
| Ink( $[\text{Co}/\text{Cu}]_{50}$ microflakes)   | 0B          | 3B       | 2B             |
| Ink( $\text{Ni}_{97}\text{Co}_3$ microparticles) | 0B          | 3B       | 2B             |

Data/Fig. 1f:

| Diameter ( $\mu\text{m}$ ) | Percentage (%) |
|----------------------------|----------------|
| 0-5                        | 69.45          |
| 5-10                       | 18.21          |
| 10-15                      | 6.55           |
| 15-20                      | 3.07           |
| 20-25                      | 1.25           |
| 25-30                      | 0.72           |
| 30-35                      | 0.43           |
| 35-40                      | 0.32           |

Data/Fig. 1g:

| Length ( $\mu\text{m}$ ) | Percentage (%) |
|--------------------------|----------------|
| 15-30                    | 5.71           |
| 30-45                    | 34.29          |
| 45-60                    | 60             |

Data/Fig. 1j:

| Time (s) | MR (%)  | 4.20976 | 0.00561 | 8.61702  | 0.00481 | 13.03023 | 0.00972 | 17.44445 | 0.00725 |
|----------|---------|---------|---------|----------|---------|----------|---------|----------|---------|
| 0        | 0.00455 | 4.41023 | 0.00506 | 8.81746  | 0.00604 | 13.23167 | 0.00933 | 17.64494 | 0.00687 |
| 0.20047  | 0.00436 | 4.61069 | 0.00501 | 9.01792  | 0.00697 | 13.43113 | 0.00961 | 17.84636 | 0.00661 |
| 0.39996  | 0.00503 | 4.81016 | 0.00448 | 9.21944  | 0.00631 | 13.63261 | 0.00949 | 18.04682 | 0.00607 |
| 0.6014   | 0.0054  | 5.01065 | 0.00451 | 9.4209   | 0.00664 | 13.83312 | 0.00899 | 18.2463  | 0.00602 |
| 0.80187  | 0.00589 | 5.21015 | 0.00479 | 9.62133  | 0.00747 | 14.03355 | 0.00938 | 18.44777 | 0.00564 |
| 1.00235  | 0.00593 | 5.41155 | 0.00454 | 9.82178  | 0.00718 | 14.23405 | 0.00838 | 18.6482  | 0.00545 |
| 1.20379  | 0.00612 | 5.61102 | 0.00388 | 10.02224 | 0.0081  | 14.43546 | 0.00791 | 18.84867 | 0.00532 |
| 1.40425  | 0.00642 | 5.8126  | 0.00432 | 10.2227  | 0.00752 | 14.63596 | 0.00805 | 19.04813 | 0.00444 |
| 1.60572  | 0.00631 | 6.013   | 0.00358 | 10.42417 | 0.00859 | 14.83753 | 0.00799 | 19.24866 | 0.00387 |
| 1.80618  | 0.00608 | 6.21345 | 0.00332 | 10.62565 | 0.00828 | 15.03887 | 0.00801 | 19.44807 | 0.00424 |
| 2.00671  | 0.00642 | 6.4129  | 0.00359 | 10.82516 | 0.00834 | 15.23836 | 0.00722 | 19.64953 | 0.00447 |
| 2.20614  | 0.00533 | 6.61334 | 0.00363 | 11.02556 | 0.00886 | 15.43884 | 0.00714 | 19.85    | 0.00481 |
| 2.40658  | 0.00574 | 6.81483 | 0.00402 | 11.22503 | 0.00848 | 15.63925 | 0.00737 | 20.05147 | 0.00509 |
| 2.60704  | 0.00576 | 7.0143  | 0.00385 | 11.42552 | 0.0089  | 15.83971 | 0.00704 | 20.25096 | 0.00551 |
| 2.80751  | 0.00572 | 7.21573 | 0.00385 | 11.62597 | 0.0087  | 16.03918 | 0.00726 | 20.45141 | 0.00523 |
| 3.00697  | 0.00584 | 7.41526 | 0.00425 | 11.82744 | 0.00908 | 16.24063 | 0.00764 | 20.65186 | 0.00693 |
| 3.20746  | 0.00607 | 7.61566 | 0.00436 | 12.02888 | 0.00948 | 16.44115 | 0.00741 | 20.85135 | 0.01023 |
| 3.40696  | 0.00571 | 7.81513 | 0.00419 | 12.22935 | 0.00928 | 16.64158 | 0.00774 | 21.05286 | 0.02397 |
| 3.60837  | 0.00553 | 8.0166  | 0.00477 | 12.43081 | 0.00901 | 16.84203 | 0.00785 | 21.25327 | 0.04267 |
| 3.80886  | 0.00542 | 8.21706 | 0.00452 | 12.63027 | 0.00965 | 17.04349 | 0.00743 | 21.45471 | 0.06427 |
| 4.00833  | 0.00551 | 8.41755 | 0.00495 | 12.83077 | 0.00926 | 17.24401 | 0.00754 | 21.6552  | 0.07043 |

|          |         |
|----------|---------|
| 21.85665 | 0.07037 |
| 22.0571  | 0.07031 |
| 22.25756 | 0.07101 |
| 22.45803 | 0.07104 |
| 22.65849 | 0.07048 |
| 22.85896 | 0.07107 |
| 23.05942 | 0.07042 |
| 23.26088 | 0.07121 |
| 23.46135 | 0.07121 |
| 23.66188 | 0.07125 |
| 23.86233 | 0.07088 |
| 24.06375 | 0.07095 |
| 24.26421 | 0.07009 |
| 24.4657  | 0.07009 |
| 24.66514 | 0.06983 |
| 24.8656  | 0.06965 |
| 25.06606 | 0.07007 |
| 25.26653 | 0.0699  |
| 25.466   | 0.06973 |
| 25.66646 | 0.06009 |
| 25.86693 | 0.01815 |
| 26.06642 | 0.00734 |
| 26.26785 | 0.00587 |
| 26.46746 | 0.00556 |
| 26.66779 | 0.00552 |
| 26.86728 | 0.00585 |
| 27.06875 | 0.00571 |
| 27.26818 | 0.00545 |
| 27.46865 | 0.00573 |
| 27.66812 | 0.00528 |
| 27.86858 | 0.00542 |
| 28.06904 | 0.00488 |
| 28.27056 | 0.00505 |
| 28.46997 | 0.00475 |
| 28.67144 | 0.00486 |
| 28.87292 | 0.00476 |
| 29.07336 | 0.00469 |
| 29.27485 | 0.00464 |
| 29.47529 | 0.0037  |
| 29.67579 | 0.00414 |
| 29.87622 | 0.004   |
| 30.0767  | 0.00416 |

|          |         |
|----------|---------|
| 30.27715 | 0.00436 |
| 30.47761 | 0.00423 |
| 30.67708 | 0.00374 |
| 30.87854 | 0.00416 |
| 31.07801 | 0.00508 |
| 31.27849 | 0.01298 |
| 31.47895 | 0.02988 |
| 31.67841 | 0.0458  |
| 31.87987 | 0.06308 |
| 32.07936 | 0.06705 |
| 32.27986 | 0.06691 |
| 32.47929 | 0.06625 |
| 32.67976 | 0.06688 |
| 32.8792  | 0.06674 |
| 33.08067 | 0.06655 |
| 33.28113 | 0.06681 |
| 33.48259 | 0.06729 |
| 33.68206 | 0.06691 |
| 33.88252 | 0.06769 |
| 34.08299 | 0.06755 |
| 34.28251 | 0.06743 |
| 34.48294 | 0.06787 |
| 34.68338 | 0.06776 |
| 34.88387 | 0.06811 |
| 35.08331 | 0.06824 |
| 35.28478 | 0.06807 |
| 35.48524 | 0.06817 |
| 35.68573 | 0.0683  |
| 35.88617 | 0.06772 |
| 36.08663 | 0.06766 |
| 36.28712 | 0.06776 |
| 36.48856 | 0.06767 |
| 36.68903 | 0.05134 |
| 36.89051 | 0.01    |
| 37.09195 | 0.00602 |
| 37.29242 | 0.00617 |
| 37.4939  | 0.00671 |
| 37.69337 | 0.00694 |
| 37.89385 | 0.00648 |
| 38.09329 | 0.00661 |
| 38.2938  | 0.00716 |
| 38.49321 | 0.00655 |

|          |         |
|----------|---------|
| 38.69473 | 0.00671 |
| 38.89415 | 0.00645 |
| 39.0946  | 0.00677 |
| 39.29409 | 0.00643 |
| 39.49457 | 0.0061  |
| 39.69506 | 0.00602 |
| 39.89546 | 0.00591 |
| 40.09593 | 0.00551 |
| 40.29641 | 0.00531 |
| 40.49691 | 0.00564 |
| 40.69633 | 0.00539 |
| 40.89679 | 0.00547 |
| 41.09631 | 0.00513 |
| 41.29772 | 0.00567 |
| 41.49719 | 0.00591 |
| 41.69771 | 0.00596 |
| 41.89816 | 0.00659 |
| 42.0986  | 0.00626 |
| 42.29907 | 0.00536 |
| 42.50051 | 0.0058  |
| 42.70097 | 0.00576 |
| 42.90143 | 0.00682 |
| 43.1029  | 0.00911 |
| 43.30339 | 0.01818 |
| 43.50383 | 0.03132 |
| 43.70429 | 0.05185 |
| 43.90578 | 0.05672 |
| 44.10522 | 0.06164 |
| 44.30668 | 0.06172 |
| 44.50717 | 0.06126 |
| 44.70866 | 0.06148 |
| 44.90808 | 0.06171 |
| 45.10854 | 0.06189 |
| 45.30902 | 0.06177 |
| 45.5085  | 0.06252 |
| 45.71    | 0.06183 |
| 45.9104  | 0.06159 |
| 46.11187 | 0.06169 |
| 46.31133 | 0.06163 |
| 46.51183 | 0.06118 |
| 46.71226 | 0.06031 |
| 46.91275 | 0.06167 |

|          |         |
|----------|---------|
| 47.11319 | 0.06119 |
| 47.31365 | 0.06075 |
| 47.51315 | 0.06136 |
| 47.71361 | 0.06088 |
| 47.9141  | 0.06154 |
| 48.11559 | 0.06119 |
| 48.31698 | 0.06042 |
| 48.51747 | 0.06044 |
| 48.7179  | 0.06073 |
| 48.9174  | 0.06018 |
| 49.11886 | 0.0604  |
| 49.31932 | 0.06045 |
| 49.52076 | 0.06044 |
| 49.72025 | 0.06059 |
| 49.92169 | 0.05972 |
| 50.12215 | 0.05948 |
| 50.32262 | 0.05947 |
| 50.52208 | 0.05908 |
| 50.72258 | 0.05685 |
| 50.92301 | 0.01711 |
| 51.12248 | 0.00767 |
| 51.32296 | 0.00577 |
| 51.52341 | 0.00552 |
| 51.72487 | 0.00604 |
| 51.92435 | 0.0061  |
| 52.1248  | 0.00653 |
| 52.32428 | 0.00658 |
| 52.5248  | 0.00648 |
| 52.72423 | 0.00648 |
| 52.92472 | 0.00707 |
| 53.12416 | 0.00721 |
| 53.3256  | 0.0075  |
| 53.52606 | 0.00788 |
| 53.72653 | 0.00855 |
| 53.92799 | 0.0085  |
| 54.12845 | 0.0087  |
| 54.32898 | 0.00748 |
| 54.52839 | 0.0082  |
| 54.72985 | 0.00798 |
| 54.93036 | 0.00795 |
| 55.13078 | 0.00838 |
| 55.33027 | 0.00837 |

|          |         |
|----------|---------|
| 55.53171 | 0.00852 |
| 55.7322  | 0.00869 |
| 55.9327  | 0.00843 |
| 56.13313 | 0.00831 |
| 56.33362 | 0.00786 |
| 56.53406 | 0.00809 |
| 56.73449 | 0.00774 |
| 56.93596 | 0.00738 |
| 57.13645 | 0.00739 |
| 57.3369  | 0.0074  |
| 57.53635 | 0.0068  |
| 57.73684 | 0.00673 |
| 57.93628 | 0.00707 |
| 58.13681 | 0.00667 |
| 58.33727 | 0.00644 |
| 58.53868 | 0.00667 |
| 58.73917 | 0.0083  |
| 58.93964 | 0.01372 |
| 59.14007 | 0.02545 |
| 59.34054 | 0.03857 |
| 59.54202 | 0.04582 |
| 59.74146 | 0.05475 |
| 59.94195 | 0.06758 |
| 60.14239 | 0.06759 |
| 60.34292 | 0.06752 |
| 60.54239 | 0.06723 |
| 60.74279 | 0.06712 |
| 60.94325 | 0.06707 |
| 61.14378 | 0.06745 |
| 61.34421 | 0.06693 |
| 61.54565 | 0.06745 |
| 61.74611 | 0.06706 |
| 61.94757 | 0.06756 |
| 62.14904 | 0.06723 |
| 62.3485  | 0.06739 |
| 62.54903 | 0.06723 |
| 62.74849 | 0.06709 |
| 62.94992 | 0.06733 |
| 63.14936 | 0.06759 |
| 63.35083 | 0.06771 |
| 63.55129 | 0.06776 |
| 63.75275 | 0.06779 |



|          |         |
|----------|---------|
| 63.95224 | 0.0676  |
| 64.15271 | 0.06754 |
| 64.35215 | 0.06786 |
| 64.55264 | 0.06717 |
| 64.75408 | 0.06684 |
| 64.95354 | 0.0664  |
| 65.15401 | 0.06637 |
| 65.35348 | 0.0662  |
| 65.55397 | 0.0664  |
| 65.75341 | 0.06607 |
| 65.95487 | 0.06626 |
| 66.15434 | 0.06649 |
| 66.3558  | 0.06642 |
| 66.55527 | 0.0668  |
| 66.75673 | 0.0549  |
| 66.9572  | 0.0158  |
| 67.15769 | 0.00601 |
| 67.35715 | 0.00421 |
| 67.55761 | 0.00343 |
| 67.75712 | 0.00353 |
| 67.95858 | 0.00329 |
| 68.15901 | 0.00291 |
| 68.35848 | 0.00265 |
| 68.55894 | 0.00203 |
| 68.75844 | 0.00221 |
| 68.95885 | 0.00259 |
| 69.15934 | 0.00287 |
| 69.36078 | 0.00289 |
| 69.56029 | 0.00259 |
| 69.76176 | 0.00315 |
| 69.96217 | 0.00342 |
| 70.16265 | 0.00262 |
| 70.3631  | 0.0024  |
| 70.56356 | 0.00277 |
| 70.76403 | 0.00308 |
| 70.96356 | 0.00324 |
| 71.16499 | 0.00306 |
| 71.36545 | 0.00338 |
| 71.56694 | 0.00332 |
| 71.76738 | 0.00359 |
| 71.96782 | 0.00347 |
| 72.1683  | 0.00385 |

|          |         |
|----------|---------|
| 72.36977 | 0.0039  |
| 72.5702  | 0.00373 |
| 72.77068 | 0.00429 |
| 72.97113 | 0.00471 |
| 73.17163 | 0.00521 |
| 73.37312 | 0.00522 |
| 73.57355 | 0.00538 |
| 73.77505 | 0.00581 |
| 73.97448 | 0.00594 |
| 74.17495 | 0.00604 |
| 74.37442 | 0.00617 |
| 74.57587 | 0.00617 |
| 74.77631 | 0.00653 |
| 74.97778 | 0.00671 |
| 75.17724 | 0.00631 |
| 75.37771 | 0.00625 |
| 75.57718 | 0.00648 |
| 75.77866 | 0.00687 |
| 75.97814 | 0.00627 |
| 76.17857 | 0.00556 |
| 76.37904 | 0.00538 |
| 76.57955 | 0.00532 |
| 76.78102 | 0.00558 |
| 76.98046 | 0.00503 |
| 77.18089 | 0.00487 |
| 77.38038 | 0.0051  |
| 77.58082 | 0.00461 |
| 77.78032 | 0.00505 |
| 77.98175 | 0.00521 |
| 78.18128 | 0.00532 |
| 78.38271 | 0.00535 |
| 78.58218 | 0.00516 |
| 78.78262 | 0.00519 |
| 78.98408 | 0.00526 |
| 79.18354 | 0.00463 |
| 79.38403 | 0.00448 |
| 79.58447 | 0.00494 |
| 79.78507 | 0.00451 |
| 79.98441 | 0.00412 |
| 80.18487 | 0.00372 |
| 80.38534 | 0.00323 |
| 80.58686 | 0.00292 |

|          |         |
|----------|---------|
| 80.78726 | 0.00237 |
| 80.98872 | 0.0026  |
| 81.18819 | 0.00394 |
| 81.38868 | 0.00768 |
| 81.58913 | 0.01436 |
| 81.78862 | 0.03682 |
| 81.98905 | 0.0519  |
| 82.18952 | 0.05806 |
| 82.38998 | 0.05788 |
| 82.59048 | 0.05805 |
| 82.79092 | 0.05892 |
| 82.99041 | 0.05835 |
| 83.19088 | 0.05947 |
| 83.39034 | 0.05953 |
| 83.5908  | 0.05901 |
| 83.79024 | 0.05854 |
| 83.99071 | 0.05869 |
| 84.19018 | 0.05868 |
| 84.39164 | 0.05941 |
| 84.5931  | 0.05961 |
| 84.79262 | 0.05897 |
| 84.99309 | 0.05857 |
| 85.1925  | 0.0585  |
| 85.39396 | 0.05885 |
| 85.59343 | 0.05853 |
| 85.79395 | 0.05856 |
| 85.99342 | 0.05834 |
| 86.19388 | 0.05827 |
| 86.39332 | 0.05846 |
| 86.59379 | 0.05814 |
| 86.79425 | 0.05761 |
| 86.99471 | 0.05794 |
| 87.19515 | 0.05819 |
| 87.39561 | 0.05775 |
| 87.59613 | 0.05797 |
| 87.7956  | 0.05805 |
| 87.99707 | 0.0586  |
| 88.1965  | 0.05877 |
| 88.39694 | 0.05852 |
| 88.59743 | 0.05824 |
| 88.79893 | 0.05849 |
| 88.99839 | 0.05794 |

|          |          |
|----------|----------|
| 89.19883 | 0.05845  |
| 89.3983  | 0.05779  |
| 89.59973 | 0.05775  |
| 89.80022 | 0.04163  |
| 90.00068 | 0.00814  |
| 90.20215 | 0.00244  |
| 90.40159 | 0.00149  |
| 90.60205 | 0.00135  |
| 90.80154 | 0.0014   |
| 91.00204 | 0.00163  |
| 91.20151 | 6.37E-04 |
| 91.40194 | 8.80E-04 |
| 91.60238 | 4.85E-04 |
| 91.80285 | 7.48E-05 |
| 92.00234 | 4.70E-04 |
| 92.20278 | 4.03E-04 |
| 92.40324 | 1.86E-04 |
| 92.60477 | 0        |
| 92.80523 | 0        |
| 93.00563 | 3.22E-05 |
| 93.20715 | 6.01E-04 |
| 93.40669 | 5.83E-04 |
| 93.60802 | 5.71E-04 |
| 93.80852 | 7.40E-04 |
| 94.00995 | 0.00102  |
| 94.20942 | 0.00104  |
| 94.41088 | 7.60E-04 |
| 94.61037 | 8.21E-04 |
| 94.81184 | 8.26E-04 |
| 95.01128 | 6.60E-04 |
| 95.21177 | 4.61E-04 |
| 95.41221 | 0.00136  |
| 95.61267 | 9.46E-04 |
| 95.81314 | 0.00104  |
| 96.01263 | 0.00137  |
| 96.21308 | 0.00115  |
| 96.41353 | 0.00132  |
| 96.614   | 0.00149  |
| 96.81347 | 0.00153  |
| 97.01393 | 0.00185  |
| 97.2134  | 0.00196  |
| 97.41386 | 0.00167  |

|           |         |
|-----------|---------|
| 97.61333  | 0.00172 |
| 97.81379  | 0.00196 |
| 98.01326  | 0.00289 |
| 98.21375  | 0.00235 |
| 98.41419  | 0.00245 |
| 98.61366  | 0.00255 |
| 98.81412  | 0.002   |
| 99.01463  | 0.00289 |
| 99.21505  | 0.00265 |
| 99.41453  | 0.00453 |
| 99.61501  | 0.01119 |
| 99.81545  | 0.03103 |
| 100.01594 | 0.06117 |
| 100.21538 | 0.07119 |
| 100.41586 | 0.07209 |
| 100.61633 | 0.07205 |
| 100.81778 | 0.0717  |
| 101.01824 | 0.07242 |
| 101.2197  | 0.07259 |
| 101.42119 | 0.0727  |
| 101.62065 | 0.07301 |
| 101.8221  | 0.07258 |
| 102.02157 | 0.07319 |
| 102.22205 | 0.07339 |
| 102.42252 | 0.07296 |
| 102.62395 | 0.07345 |
| 102.82341 | 0.07442 |
| 103.02388 | 0.07397 |
| 103.2244  | 0.07419 |
| 103.42593 | 0.07393 |
| 103.62527 | 0.07433 |
| 103.82673 | 0.07389 |
| 104.0282  | 0.07458 |
| 104.22866 | 0.0742  |
| 104.42919 | 0.07298 |
| 104.62862 | 0.06432 |
| 104.83006 | 0.0644  |
| 105.03052 | 0.06453 |
| 105.231   | 0.0639  |
| 105.43048 | 0.06422 |
| 105.63191 | 0.0618  |
| 105.83139 | 0.01557 |

|           |         |
|-----------|---------|
| 106.03185 | 0.0078  |
| 106.23134 | 0.00731 |
| 106.43278 | 0.00734 |
| 106.63326 | 0.00735 |
| 106.83473 | 0.00766 |
| 107.0352  | 0.00798 |
| 107.23563 | 0.00821 |
| 107.4371  | 0.00741 |
| 107.63657 | 0.00739 |
| 107.83802 | 0.00762 |
| 108.03849 | 0.00749 |
| 108.23995 | 0.00775 |
| 108.44046 | 0.0076  |
| 108.64088 | 0.00812 |
| 108.8404  | 0.00811 |
| 109.04186 | 0.00875 |
| 109.24227 | 0.00864 |
| 109.44274 | 0.00851 |
| 109.6442  | 0.00866 |
| 109.84466 | 0.00887 |
| 110.04613 | 0.00905 |
| 110.24559 | 0.00925 |
| 110.44706 | 0.00888 |
| 110.64659 | 0.00925 |
| 110.84702 | 0.00928 |
| 111.04745 | 0.00967 |
| 111.24794 | 0.01003 |

|           |         |
|-----------|---------|
| 111.44838 | 0.00976 |
| 111.64887 | 0.01033 |
| 111.84931 | 0.01046 |
| 112.04977 | 0.01085 |
| 112.25025 | 0.01111 |
| 112.45173 | 0.01057 |
| 112.65218 | 0.0107  |
| 112.85166 | 0.01042 |
| 113.05215 | 0.01042 |
| 113.25256 | 0.01033 |
| 113.45303 | 0.0103  |
| 113.6535  | 0.01033 |
| 113.85396 | 0.01062 |
| 114.05445 | 0.01032 |
| 114.25591 | 0.0103  |
| 114.45635 | 0.01008 |
| 114.65682 | 0.01061 |
| 114.85631 | 0.01031 |
| 115.05675 | 0.01005 |
| 115.25627 | 0.01025 |
| 115.45768 | 0.0101  |
| 115.65817 | 0.01026 |
| 115.8586  | 0.0101  |
| 116.06007 | 0.01032 |
| 116.25954 | 0.0105  |
| 116.46    | 0.01055 |
| 116.65947 | 0.01071 |

|           |         |
|-----------|---------|
| 116.86    | 0.01094 |
| 117.06039 | 0.01033 |
| 117.26098 | 0.01116 |
| 117.46033 | 0.01147 |
| 117.66182 | 0.01036 |
| 117.86131 | 0.01045 |
| 118.06175 | 0.01039 |
| 118.26223 | 0.01086 |
| 118.46265 | 0.01122 |
| 118.66315 | 0.01143 |
| 118.86358 | 0.01127 |
| 119.06404 | 0.01124 |
| 119.26451 | 0.01122 |
| 119.46597 | 0.01132 |
| 119.66545 | 0.0109  |
| 119.86591 | 0.01011 |
| 120.0654  | 0.01021 |
| 120.26583 | 0.00957 |
| 120.46633 | 0.00905 |
| 120.66778 | 0.00929 |
| 120.86829 | 0.00876 |
| 121.06869 | 0.00881 |
| 121.27015 | 0.00874 |
| 121.46968 | 0.00854 |
| 121.67008 | 0.00883 |
| 121.87055 | 0.00876 |
| 122.07102 | 0.00928 |

|           |         |
|-----------|---------|
| 122.27148 | 0.00769 |
| 122.47194 | 0.00783 |
| 122.67144 | 0.00705 |
| 122.87187 | 0.00681 |
| 123.07237 | 0.00587 |
| 123.2738  | 0.00559 |
| 123.47427 | 0.00493 |
| 123.67377 | 0.00445 |
| 123.87422 | 0.00421 |
| 124.07466 | 0.00351 |
| 124.27613 | 0.00389 |
| 124.47559 | 0.00317 |
| 124.67606 | 0.00304 |
| 124.87653 | 0.00318 |
| 125.07701 | 0.003   |
| 125.27749 | 0.00296 |
| 125.47797 | 0.00259 |
| 125.67738 | 0.00252 |
| 125.87791 | 0.00256 |
| 126.07734 | 0.00272 |
| 126.27781 | 0.00314 |
| 126.47824 | 0.00208 |
| 126.67871 | 0.00234 |
| 126.88023 | 0.00227 |
| 127.07965 | 0.00211 |
| 127.2811  | 0.00265 |
| 127.48158 | 0.00272 |

|           |          |
|-----------|----------|
| 127.68305 | 0.00207  |
| 127.88349 | 0.00266  |
| 128.08495 | 0.0031   |
| 128.28442 | 0.00305  |
| 128.48491 | 0.00293  |
| 128.68441 | 0.00311  |
| 128.88581 | 0.00267  |
| 129.08728 | 0.00272  |
| 129.28787 | 0.00192  |
| 129.48823 | 0.00183  |
| 129.6877  | 0.00199  |
| 129.88916 | 0.00176  |
| 130.08863 | 0.00137  |
| 130.2891  | 0.00171  |
| 130.48953 | 0.00133  |
| 130.69003 | 0.00145  |
| 130.8896  | 0.00122  |
| 131.08993 | 0.00133  |
| 131.2904  | 9.48E-04 |
| 131.49188 | 8.95E-04 |
| 131.69232 | 8.90E-04 |
| 131.89385 | 7.36E-04 |
| 132.09425 | 7.37E-04 |
| 132.29473 | 5.11E-04 |
| 132.49617 | 0        |

Data/Fig. 1k:

| Time (s) | MR (%)  |
|----------|---------|
| 0        | 1.5408  |
| 0.20046  | 1.53776 |
| 0.40192  | 1.536   |
| 0.60239  | 1.54563 |
| 0.80385  | 1.54411 |
| 1.00437  | 1.55453 |
| 1.20492  | 1.54437 |
| 1.40427  | 1.54089 |
| 1.60471  | 1.54384 |
| 1.8042   | 1.55781 |
| 2.00464  | 1.54345 |
| 2.20511  | 1.54572 |

|         |         |
|---------|---------|
| 2.40457 | 1.53824 |
| 2.60603 | 1.54411 |
| 2.8055  | 1.54557 |
| 3.00602 | 1.54985 |
| 3.20556 | 1.53999 |
| 3.40689 | 1.54053 |
| 3.60738 | 1.55198 |
| 3.80882 | 1.54151 |
| 4.00928 | 1.5389  |
| 4.20981 | 1.54848 |
| 4.40934 | 1.54407 |
| 4.6097  | 1.55167 |
| 4.81114 | 1.53843 |

|         |         |
|---------|---------|
| 5.01061 | 1.54222 |
| 5.21112 | 1.55336 |
| 5.4106  | 1.53066 |
| 5.61104 | 1.551   |
| 5.81047 | 1.5392  |
| 6.01193 | 1.55375 |
| 6.21142 | 1.54638 |
| 6.41286 | 1.54562 |
| 6.61332 | 1.54347 |
| 6.81481 | 1.54721 |
| 7.01428 | 1.53986 |
| 7.21572 | 1.55003 |
| 7.41524 | 1.5406  |

|          |         |
|----------|---------|
| 7.61667  | 1.54825 |
| 7.81718  | 1.53873 |
| 8.01663  | 1.54308 |
| 8.21806  | 1.55457 |
| 8.41753  | 1.54167 |
| 8.61902  | 1.55159 |
| 8.8185   | 1.54603 |
| 9.0189   | 1.54879 |
| 9.21836  | 1.55106 |
| 9.41887  | 1.55656 |
| 9.61929  | 1.54347 |
| 9.81978  | 1.54533 |
| 10.01924 | 1.54411 |

|          |         |
|----------|---------|
| 10.22068 | 1.55702 |
| 10.42215 | 1.53759 |
| 10.62261 | 1.5486  |
| 10.82407 | 1.55062 |
| 11.02455 | 1.55537 |
| 11.226   | 1.54414 |
| 11.42548 | 1.55447 |
| 11.62693 | 1.55038 |
| 11.82739 | 1.53962 |
| 12.02885 | 1.54735 |
| 12.22933 | 1.53512 |
| 12.42978 | 1.55159 |
| 12.62925 | 1.54297 |

|          |         |
|----------|---------|
| 12.83071 | 1.53287 |
| 13.03123 | 1.49893 |
| 13.23165 | 1.44073 |
| 13.43216 | 1.34679 |
| 13.63259 | 1.21258 |
| 13.83403 | 0.95659 |
| 14.03452 | 0.61884 |
| 14.23496 | 0.33071 |
| 14.43542 | 0.18632 |
| 14.63689 | 0.15463 |
| 14.83635 | 0.16584 |
| 15.03783 | 0.15507 |
| 15.23728 | 0.15628 |
| 15.43777 | 0.14025 |
| 15.63723 | 0.14229 |
| 15.83867 | 0.14276 |
| 16.03917 | 0.13251 |
| 16.23866 | 0.13293 |
| 16.43913 | 0.14064 |
| 16.63856 | 0.13764 |
| 16.839   | 0.14191 |
| 17.03846 | 0.12523 |
| 17.23995 | 0.1324  |
| 17.43939 | 0.13397 |
| 17.64085 | 0.13609 |
| 17.84132 | 0.13484 |
| 18.04178 | 0.12767 |
| 18.24227 | 0.13874 |
| 18.44273 | 0.13136 |
| 18.64417 | 0.13246 |
| 18.84464 | 0.46228 |
| 19.0451  | 0.88536 |
| 19.24557 | 1.28124 |
| 19.44708 | 1.4401  |
| 19.64649 | 1.48945 |
| 19.84801 | 1.49989 |
| 20.04842 | 1.51208 |
| 20.24888 | 1.50898 |
| 20.44935 | 1.51458 |
| 20.64984 | 1.50726 |
| 20.85028 | 1.52009 |
| 21.05177 | 1.50638 |

|          |         |
|----------|---------|
| 21.2522  | 1.51235 |
| 21.45268 | 1.51418 |
| 21.65413 | 1.51964 |
| 21.8546  | 1.51179 |
| 22.05506 | 1.51544 |
| 22.25455 | 1.51592 |
| 22.45602 | 1.50966 |
| 22.65545 | 1.51469 |
| 22.85694 | 1.51938 |
| 23.05738 | 1.52511 |
| 23.2579  | 1.51902 |
| 23.45733 | 1.51777 |
| 23.65777 | 1.51623 |
| 23.85724 | 1.52646 |
| 24.05771 | 1.51761 |
| 24.25817 | 1.51614 |
| 24.45764 | 1.53117 |
| 24.6591  | 1.52395 |
| 24.85959 | 1.53424 |
| 25.06003 | 1.51933 |
| 25.25949 | 1.4961  |
| 25.46098 | 1.47347 |
| 25.66042 | 1.43731 |
| 25.86188 | 1.4015  |
| 26.06137 | 1.30054 |
| 26.26183 | 1.06659 |
| 26.4623  | 0.83218 |
| 26.66377 | 0.54021 |
| 26.86426 | 0.28406 |
| 27.06473 | 0.2401  |
| 27.26616 | 0.23985 |
| 27.46673 | 0.23494 |
| 27.66812 | 0.23151 |
| 27.86758 | 0.22722 |
| 28.06803 | 0.21792 |
| 28.26748 | 0.21668 |
| 28.46895 | 0.2165  |
| 28.66838 | 0.21243 |
| 28.86885 | 0.21068 |
| 29.06931 | 0.21677 |
| 29.27078 | 0.20738 |
| 29.47024 | 0.20644 |

|          |         |
|----------|---------|
| 29.67171 | 0.20376 |
| 29.87217 | 0.2106  |
| 30.07263 | 0.20605 |
| 30.27409 | 0.21532 |
| 30.47356 | 0.21466 |
| 30.67508 | 0.20675 |
| 30.87449 | 0.20582 |
| 31.07496 | 0.20653 |
| 31.27542 | 0.19775 |
| 31.47688 | 0.19724 |
| 31.67635 | 0.20482 |
| 31.87681 | 0.18725 |
| 32.07634 | 0.19809 |
| 32.27674 | 0.20565 |
| 32.4782  | 0.26244 |
| 32.67867 | 0.90422 |
| 32.88013 | 1.29671 |
| 33.07961 | 1.43639 |
| 33.28006 | 1.48392 |
| 33.47955 | 1.50861 |
| 33.68099 | 1.51521 |
| 33.88149 | 1.52143 |
| 34.08291 | 1.52222 |
| 34.28338 | 1.53021 |
| 34.48484 | 1.53171 |
| 34.68433 | 1.52132 |
| 34.88477 | 1.52365 |
| 35.0843  | 1.52953 |
| 35.28473 | 1.53714 |
| 35.48522 | 1.52524 |
| 35.68467 | 1.52783 |
| 35.88612 | 1.53171 |
| 36.08656 | 1.52878 |
| 36.28703 | 1.52882 |
| 36.48749 | 1.52533 |
| 36.68798 | 1.53078 |
| 36.88842 | 1.52762 |
| 37.08891 | 1.52608 |
| 37.28835 | 1.52942 |
| 37.48884 | 1.52871 |
| 37.68831 | 1.53498 |
| 37.88976 | 1.52577 |

|          |         |
|----------|---------|
| 38.09021 | 1.52819 |
| 38.28967 | 1.52212 |
| 38.49015 | 1.5328  |
| 38.68961 | 1.53472 |
| 38.89007 | 1.52914 |
| 39.09053 | 1.53565 |
| 39.29199 | 1.53398 |
| 39.49146 | 1.5351  |
| 39.69292 | 1.52322 |
| 39.8934  | 1.5289  |
| 40.09388 | 1.52626 |
| 40.29338 | 1.53624 |
| 40.49482 | 1.53163 |
| 40.69425 | 1.53935 |
| 40.89471 | 1.53788 |
| 41.09524 | 1.52836 |
| 41.29564 | 1.51561 |
| 41.4971  | 1.49098 |
| 41.69757 | 1.44977 |
| 41.89904 | 1.39654 |
| 42.0985  | 1.29278 |
| 42.29896 | 1.11332 |
| 42.49942 | 0.81388 |
| 42.6999  | 0.48318 |
| 42.89936 | 0.22184 |
| 43.09982 | 0.12788 |
| 43.29929 | 0.11514 |
| 43.49978 | 0.11964 |
| 43.70021 | 0.09928 |
| 43.89974 | 0.10246 |
| 44.10017 | 0.08984 |
| 44.29961 | 0.09696 |
| 44.5001  | 0.09101 |
| 44.70054 | 0.08452 |
| 44.901   | 0.08155 |
| 45.10047 | 0.06937 |
| 45.30195 | 0.08564 |
| 45.50141 | 0.0801  |
| 45.70288 | 0.07598 |
| 45.90239 | 0.08898 |
| 46.10379 | 0.10023 |
| 46.30428 | 0.10229 |

|          |         |
|----------|---------|
| 46.50474 | 0.10901 |
| 46.70618 | 0.10993 |
| 46.90667 | 0.11481 |
| 47.10714 | 0.11009 |
| 47.30757 | 0.11706 |
| 47.50905 | 0.09826 |
| 47.70853 | 0.10338 |
| 47.90996 | 0.10807 |
| 48.11043 | 0.10545 |
| 48.31189 | 0.10627 |
| 48.51139 | 0.10256 |
| 48.71282 | 0.11401 |
| 48.91228 | 0.11272 |
| 49.11377 | 0.111   |
| 49.31521 | 0.10561 |
| 49.51467 | 0.10653 |
| 49.71616 | 0.1034  |
| 49.91561 | 0.10473 |
| 50.11706 | 0.29932 |
| 50.31667 | 0.82868 |
| 50.517   | 1.28918 |
| 50.71649 | 1.46647 |
| 50.91792 | 1.4957  |
| 51.11844 | 1.5105  |
| 51.31988 | 1.52429 |
| 51.51935 | 1.52423 |
| 51.72078 | 1.52961 |
| 51.92127 | 1.52623 |
| 52.12283 | 1.52186 |
| 52.32317 | 1.52111 |
| 52.52266 | 1.53205 |
| 52.7231  | 1.53339 |
| 52.92257 | 1.53156 |
| 53.12403 | 1.52779 |
| 53.3235  | 1.53146 |
| 53.52402 | 1.53546 |
| 53.72445 | 1.52771 |
| 53.9259  | 1.5285  |
| 54.12537 | 1.5335  |
| 54.32585 | 1.52878 |
| 54.52528 | 1.53696 |
| 54.72576 | 1.53355 |

|          |         |
|----------|---------|
| 54.92621 | 1.53056 |
| 55.12573 | 1.52593 |
| 55.32615 | 1.53022 |
| 55.52661 | 1.53623 |
| 55.72711 | 1.53346 |
| 55.92655 | 1.5336  |
| 56.12706 | 1.53758 |
| 56.32647 | 1.53769 |
| 56.52698 | 1.53797 |
| 56.7274  | 1.53808 |
| 56.92789 | 1.53221 |
| 57.12739 | 1.53728 |
| 57.32779 | 1.52828 |
| 57.52927 | 1.53    |
| 57.73074 | 1.53567 |
| 57.93121 | 1.53717 |
| 58.13066 | 1.52974 |
| 58.33114 | 1.53755 |
| 58.53059 | 1.53764 |
| 58.73106 | 1.53464 |
| 58.93054 | 1.53538 |
| 59.13203 | 1.54391 |
| 59.33244 | 1.53608 |
| 59.53293 | 1.54056 |
| 59.73337 | 1.53502 |
| 59.93383 | 1.52077 |
| 60.13432 | 1.49799 |
| 60.33576 | 1.4565  |
| 60.53724 | 1.37882 |
| 60.73671 | 1.21332 |
| 60.93817 | 0.99364 |
| 61.13761 | 0.65316 |
| 61.33808 | 0.38556 |
| 61.5376  | 0.26479 |
| 61.73801 | 0.21953 |
| 61.93749 | 0.2055  |
| 62.13897 | 0.20558 |
| 62.3384  | 0.17272 |
| 62.53987 | 0.1256  |
| 62.7394  | 0.08178 |
| 62.9398  | 0.0589  |
| 63.14029 | 0.04901 |

|          |         |
|----------|---------|
| 63.34075 | 0.04045 |
| 63.54125 | 0.0523  |
| 63.74168 | 0.03414 |
| 63.94212 | 0.04286 |
| 64.1426  | 0.04136 |
| 64.34406 | 0.03356 |
| 64.54454 | 0.02411 |
| 64.74602 | 0.03129 |
| 64.94644 | 0.02301 |
| 65.14792 | 0.02566 |
| 65.34739 | 0.02865 |
| 65.54783 | 0.0303  |
| 65.74832 | 0.01863 |
| 65.94876 | 0.02496 |
| 66.15022 | 0.02567 |
| 66.34969 | 0.02264 |
| 66.55019 | 0.00964 |
| 66.74962 | 0.01893 |
| 66.9511  | 0.01241 |
| 67.15055 | 0.01993 |
| 67.35103 | 0.00733 |
| 67.55148 | 0.01801 |
| 67.75293 | 0.0145  |
| 67.95246 | 0.01539 |
| 68.15387 | 0.01285 |
| 68.35433 | 0.02237 |
| 68.55579 | 0.01223 |
| 68.75628 | 0.00783 |
| 68.95572 | 0.00324 |
| 69.15624 | 0.00918 |
| 69.35665 | 0.00609 |
| 69.55711 | 0.01009 |
| 69.75761 | 0.00975 |
| 69.95806 | 0.00827 |
| 70.15751 | 0.01364 |
| 70.358   | 0.01377 |
| 70.55844 | 0.00109 |
| 70.75891 | 0.00307 |
| 70.95939 | 0.0105  |
| 71.15983 | 0       |
| 71.36035 | 0.32068 |
| 71.56178 | 0.99641 |

|          |         |
|----------|---------|
| 71.76322 | 1.34176 |
| 71.96268 | 1.40387 |
| 72.16321 | 1.43232 |
| 72.36361 | 1.46154 |
| 72.56408 | 1.46155 |
| 72.76357 | 1.464   |
| 72.96405 | 1.46719 |
| 73.16348 | 1.47638 |
| 73.36496 | 1.48508 |
| 73.56441 | 1.48696 |
| 73.7649  | 1.48872 |
| 73.96537 | 1.49837 |
| 74.16586 | 1.48734 |
| 74.36629 | 1.49172 |
| 74.56775 | 1.49041 |
| 74.76921 | 1.48492 |
| 74.96966 | 1.49913 |
| 75.17117 | 1.48884 |
| 75.37058 | 1.49064 |
| 75.57204 | 1.48608 |
| 75.7725  | 1.49082 |
| 75.97396 | 1.48568 |
| 76.17346 | 1.48631 |
| 76.37489 | 1.48025 |
| 76.57436 | 1.47626 |
| 76.77583 | 1.49487 |
| 76.9764  | 1.46865 |
| 77.17675 | 1.49663 |
| 77.37821 | 1.49034 |
| 77.57768 | 1.48528 |
| 77.77914 | 1.49102 |
| 77.9796  | 1.48826 |
| 78.18107 | 1.49387 |
| 78.38053 | 1.48622 |
| 78.582   | 1.48941 |
| 78.78146 | 1.4966  |
| 78.98292 | 1.48492 |
| 79.18239 | 1.49846 |
| 79.38385 | 1.49424 |
| 79.58332 | 1.50271 |
| 79.78378 | 1.48981 |
| 79.98524 | 1.49975 |

|          |         |
|----------|---------|
| 80.18471 | 1.50063 |
| 80.38518 | 1.49671 |
| 80.58464 | 1.49038 |
| 80.7861  | 1.49774 |
| 80.98557 | 1.49849 |
| 81.18704 | 1.48833 |
| 81.3865  | 1.49128 |
| 81.58796 | 1.49371 |
| 81.78744 | 1.49493 |
| 81.98889 | 1.49738 |
| 82.18836 | 1.50486 |
| 82.38982 | 1.50343 |
| 82.59128 | 1.49047 |
| 82.79174 | 1.49121 |
| 82.99321 | 1.49717 |
| 83.19267 | 1.48582 |
| 83.39414 | 1.49115 |
| 83.5936  | 1.48626 |
| 83.79506 | 1.46541 |
| 83.99553 | 1.41917 |
| 84.19599 | 1.32485 |
| 84.39646 | 1.09246 |
| 84.59692 | 0.7991  |
| 84.79738 | 0.48526 |
| 84.99885 | 0.37401 |
| 85.19833 | 0.35646 |
| 85.39978 | 0.33903 |
| 85.60024 | 0.33649 |
| 85.8007  | 0.3298  |
| 86.00117 | 0.31151 |
| 86.20163 | 0.25536 |
| 86.4021  | 0.23664 |
| 86.60256 | 0.23588 |
| 86.80402 | 0.22995 |
| 87.00449 | 0.19324 |
| 87.20495 | 0.15403 |
| 87.40442 | 0.14624 |
| 87.60489 | 0.14833 |
| 87.80535 | 0.13882 |
| 88.00581 | 0.14597 |
| 88.20628 | 0.12802 |
| 88.40674 | 0.05386 |

|          |         |
|----------|---------|
| 88.60821 | 0.03658 |
| 88.80767 | 0.03727 |
| 89.00813 | 0.04153 |
| 89.2076  | 0.03647 |
| 89.40906 | 0.02707 |
| 89.60953 | 0.02029 |
| 89.80999 | 0.02239 |
| 90.00946 | 0.01638 |
| 90.20992 | 0.01467 |
| 90.40939 | 0.02258 |
| 90.60985 | 0.01145 |
| 90.80932 | 0.02141 |
| 91.01078 | 0       |
| 91.21125 | 0       |
| 91.41071 | 0       |
| 91.61118 | 0.00719 |
| 91.81064 | 0.00879 |
| 92.01211 | 0.00508 |
| 92.21157 | 0.00581 |
| 92.41303 | 0.01994 |
| 92.6125  | 0.02882 |
| 92.81296 | 0.01607 |
| 93.01244 | 0.0169  |
| 93.2129  | 0.0184  |
| 93.41336 | 0.01463 |
| 93.61383 | 0.01838 |
| 93.81429 | 0.01814 |
| 94.01376 | 0.01831 |
| 94.21522 | 0.0182  |
| 94.41468 | 0.02228 |
| 94.61515 | 0.01498 |
| 94.81561 | 0.01474 |
| 95.01608 | 0.0212  |
| 95.21655 | 0.01297 |
| 95.418   | 0.01861 |
| 95.61747 | 0.02173 |
| 95.81894 | 0.01757 |
| 96.0184  | 0.0118  |
| 96.21986 | 0.00975 |
| 96.42032 | 0.01111 |
| 96.62179 | 0.01152 |
| 96.82325 | 0.01679 |

|          |         |
|----------|---------|
| 97.02271 | 0.01373 |
| 97.22418 | 0.02086 |
| 97.42464 | 0.01681 |
| 97.6261  | 0.01989 |
| 97.82657 | 0       |
| 98.02803 | 0.01212 |
| 98.22749 | 0.01078 |
| 98.42896 | 0.01733 |
| 98.62942 | 0.01225 |
| 98.82989 | 0.04455 |
| 99.02935 | 0.61449 |
| 99.23081 | 1.13078 |
| 99.43228 | 1.34596 |
| 99.63174 | 1.40703 |
| 99.8332  | 1.43171 |
| 100.0337 | 1.43511 |
| 100.2341 | 1.44698 |
| 100.4336 | 1.45543 |
| 100.6351 | 1.45791 |
| 100.8355 | 1.45461 |
| 101.036  | 1.46405 |
| 101.2355 | 1.46154 |
| 101.4369 | 1.45932 |

|          |         |
|----------|---------|
| 101.6374 | 1.45398 |
| 101.8388 | 1.45916 |
| 102.0393 | 1.46594 |
| 102.2388 | 1.45824 |
| 102.4402 | 1.46096 |
| 102.6397 | 1.46417 |
| 102.8402 | 1.46337 |
| 103.0397 | 1.46495 |
| 103.2401 | 1.45806 |
| 103.4406 | 1.46747 |
| 103.642  | 1.46854 |
| 103.8415 | 1.47162 |
| 104.042  | 1.46486 |
| 104.2414 | 1.46561 |
| 104.4429 | 1.46884 |
| 104.6424 | 1.47344 |
| 104.8428 | 1.46521 |
| 105.0433 | 1.47836 |
| 105.2428 | 1.4665  |
| 105.4442 | 1.46871 |
| 105.6437 | 1.46534 |
| 105.8441 | 1.46586 |
| 106.0446 | 1.47228 |

|          |         |
|----------|---------|
| 106.2461 | 1.46754 |
| 106.4455 | 1.46484 |
| 106.646  | 1.48385 |
| 106.8455 | 1.46784 |
| 107.0459 | 1.46752 |
| 107.2454 | 1.47451 |
| 107.4469 | 1.47549 |
| 107.6473 | 1.47484 |
| 107.8468 | 1.45897 |
| 108.0483 | 1.47081 |
| 108.2477 | 1.47568 |
| 108.4492 | 1.46016 |
| 108.6496 | 1.47724 |
| 108.8511 | 1.47176 |
| 109.0516 | 1.46415 |
| 109.252  | 1.47102 |
| 109.4515 | 1.4728  |
| 109.653  | 1.46978 |
| 109.8534 | 1.47276 |
| 110.0549 | 1.47107 |
| 110.2544 | 1.47411 |
| 110.4548 | 1.47629 |
| 110.6553 | 1.47531 |

|          |         |
|----------|---------|
| 110.8548 | 1.47297 |
| 111.0552 | 1.46893 |
| 111.2557 | 1.47813 |
| 111.4572 | 1.48002 |
| 111.6576 | 1.47945 |
| 111.8591 | 1.47617 |
| 112.0585 | 1.472   |
| 112.259  | 1.47202 |
| 112.4595 | 1.47515 |
| 112.6609 | 1.48536 |
| 112.8604 | 1.46281 |
| 113.0619 | 1.43866 |
| 113.2623 | 1.37556 |
| 113.4628 | 1.22073 |
| 113.6632 | 0.9441  |
| 113.8637 | 0.57466 |
| 114.0642 | 0.23736 |
| 114.2646 | 0.10754 |
| 114.4661 | 0.0883  |
| 114.6666 | 0.08361 |
| 114.868  | 0.06829 |
| 115.0685 | 0.06166 |
| 115.269  | 0.06165 |

|          |         |
|----------|---------|
| 115.4684 | 0.05165 |
| 115.6689 | 0.04855 |
| 115.8694 | 0.04301 |
| 116.0708 | 0.0389  |
| 116.2723 | 0.03492 |
| 116.4717 | 0.02444 |
| 116.6722 | 0.02164 |
| 116.8727 | 0.01729 |
| 117.0741 | 0.02407 |
| 117.2746 | 0.01558 |
| 117.4751 | 0.02077 |
| 117.6745 | 0.01646 |
| 117.8751 | 0.01996 |
| 118.0745 | 0.00728 |
| 118.275  | 0.0116  |
| 118.4754 | 0.01348 |
| 118.6759 | 0.01221 |
| 118.8774 | 0.00336 |
| 119.0778 | 0.01172 |
| 119.2782 | 0.00444 |
| 119.4777 | 0.0031  |

Data/ Fig. 2a:

| Magnetic field (mT) | MR (%)  |
|---------------------|---------|
| 94.91328            | 0.0531  |
| 93.84174            | 0.05725 |
| 92.74648            | 0.0621  |
| 91.77263            | 0.06454 |
| 90.69894            | 0.07025 |
| 89.69698            | 0.07716 |
| 88.67176            | 0.08169 |
| 87.67789            | 0.09098 |
| 86.65827            | 0.09496 |
| 85.61667            | 0.1021  |
| 84.6386             | 0.10409 |
| 83.64674            | 0.10945 |
| 82.56681            | 0.12046 |
| 81.63532            | 0.12457 |
| 80.57959            | 0.13373 |

|          |         |
|----------|---------|
| 79.56911 | 0.13772 |
| 78.56959 | 0.14462 |
| 77.56226 | 0.15825 |
| 76.57551 | 0.15757 |
| 75.52825 | 0.16895 |
| 74.60259 | 0.17649 |
| 73.51663 | 0.18217 |
| 72.52235 | 0.19171 |
| 71.52782 | 0.19673 |
| 70.52908 | 0.20441 |
| 69.52781 | 0.21982 |
| 68.45425 | 0.22305 |
| 67.49792 | 0.23521 |
| 66.47658 | 0.24236 |
| 65.47705 | 0.25117 |
| 64.46086 | 0.26297 |

|          |         |
|----------|---------|
| 63.47186 | 0.27117 |
| 62.44425 | 0.28604 |
| 61.44143 | 0.29699 |
| 60.42169 | 0.30552 |
| 59.42412 | 0.32067 |
| 58.37138 | 0.33479 |
| 57.41741 | 0.34511 |
| 56.35039 | 0.35542 |
| 55.37626 | 0.36969 |
| 54.37246 | 0.38264 |
| 53.38442 | 0.39831 |
| 52.39028 | 0.41375 |
| 51.32894 | 0.42894 |
| 50.39154 | 0.44557 |
| 49.30312 | 0.46286 |
| 48.29991 | 0.48283 |

|          |         |
|----------|---------|
| 47.30071 | 0.49581 |
| 46.28111 | 0.52044 |
| 45.36701 | 0.53877 |
| 44.28949 | 0.56279 |
| 43.34312 | 0.58519 |
| 42.28134 | 0.61133 |
| 41.3022  | 0.63742 |
| 40.30518 | 0.65729 |
| 39.27316 | 0.68657 |
| 38.32643 | 0.71463 |
| 37.25312 | 0.73924 |
| 36.29543 | 0.77031 |
| 35.24366 | 0.80398 |
| 34.30502 | 0.83843 |
| 33.24622 | 0.87479 |
| 32.32366 | 0.91166 |

|          |         |
|----------|---------|
| 31.2331  | 0.94901 |
| 30.28981 | 0.99593 |
| 29.23316 | 1.03854 |
| 28.26003 | 1.08636 |
| 27.20643 | 1.14322 |
| 26.22497 | 1.19661 |
| 25.18263 | 1.25358 |
| 24.23332 | 1.3112  |
| 23.21996 | 1.37647 |
| 22.22268 | 1.44862 |
| 21.16697 | 1.52306 |
| 20.22804 | 1.59963 |
| 19.17852 | 1.68048 |
| 18.19256 | 1.7681  |
| 17.19097 | 1.86271 |
| 16.18679 | 1.96094 |

|           |         |
|-----------|---------|
| 15.19185  | 2.06553 |
| 14.15313  | 2.17421 |
| 13.18802  | 2.29161 |
| 12.13127  | 2.41721 |
| 11.20356  | 2.54732 |
| 10.15254  | 2.68417 |
| 9.1981    | 2.82308 |
| 8.14441   | 2.96994 |
| 7.16114   | 3.13205 |
| 6.16572   | 3.29635 |
| 5.11887   | 3.45614 |
| 4.1882    | 3.62591 |
| 3.14318   | 3.78334 |
| 2.15739   | 3.92448 |
| 1.16711   | 4.07596 |
| 0.12025   | 4.21976 |
| -0.86747  | 4.36921 |
| -1.85261  | 4.51182 |
| -2.84023  | 4.62295 |
| -3.82264  | 4.68695 |
| -4.89034  | 4.70043 |
| -5.82413  | 4.6884  |
| -6.88228  | 4.64274 |
| -7.82715  | 4.57532 |
| -8.87448  | 4.48455 |
| -9.81302  | 4.34236 |
| -10.88131 | 4.1747  |
| -11.8799  | 4.00414 |
| -12.86959 | 3.8235  |
| -13.85867 | 3.64721 |
| -14.83462 | 3.46344 |
| -15.90185 | 3.26832 |
| -16.84665 | 3.08264 |
| -17.89549 | 2.92189 |
| -18.8793  | 2.75862 |
| -19.89355 | 2.5834  |
| -20.89332 | 2.42562 |
| -21.8979  | 2.27636 |
| -22.89362 | 2.14082 |
| -23.89086 | 2.02014 |
| -24.9048  | 1.89244 |
| -25.90809 | 1.77754 |

|           |         |
|-----------|---------|
| -26.89394 | 1.65285 |
| -27.83889 | 1.55139 |
| -28.9143  | 1.44792 |
| -29.90516 | 1.36282 |
| -30.89574 | 1.28326 |
| -31.90295 | 1.21364 |
| -32.90166 | 1.15184 |
| -33.94238 | 1.08164 |
| -34.87444 | 1.0191  |
| -35.93638 | 0.96293 |
| -36.8811  | 0.91036 |
| -37.93416 | 0.86148 |
| -38.91741 | 0.8183  |
| -39.89069 | 0.77697 |
| -40.96503 | 0.73905 |
| -41.91732 | 0.70492 |
| -42.96874 | 0.67039 |
| -43.90244 | 0.63806 |
| -44.93023 | 0.60852 |
| -45.91105 | 0.5776  |
| -46.92092 | 0.55451 |
| -47.90313 | 0.52873 |
| -48.95232 | 0.51053 |
| -49.94109 | 0.48703 |
| -50.97989 | 0.46798 |
| -51.92406 | 0.44835 |
| -52.9746  | 0.43191 |
| -53.90357 | 0.41441 |
| -54.95918 | 0.39713 |
| -55.94522 | 0.37601 |
| -56.92342 | 0.36745 |
| -57.96401 | 0.34854 |
| -58.92549 | 0.33662 |
| -59.98557 | 0.31833 |
| -60.96742 | 0.30991 |
| -61.96426 | 0.30088 |
| -62.9415  | 0.28407 |
| -63.93495 | 0.27537 |
| -64.99246 | 0.26421 |
| -65.9444  | 0.25462 |
| -67.0003  | 0.23837 |
| -67.94411 | 0.23064 |

|           |         |
|-----------|---------|
| -69.011   | 0.22158 |
| -69.98408 | 0.21134 |
| -70.96863 | 0.20595 |
| -71.94915 | 0.19631 |
| -72.92252 | 0.18582 |
| -73.99645 | 0.18221 |
| -74.97928 | 0.17195 |
| -75.97463 | 0.16782 |
| -76.97249 | 0.16094 |
| -77.95198 | 0.152   |
| -79.01227 | 0.14714 |
| -80.0025  | 0.13595 |
| -81.00068 | 0.13109 |
| -82.03231 | 0.1205  |
| -83.00768 | 0.11795 |
| -83.97143 | 0.11315 |
| -85.03984 | 0.10585 |
| -85.98348 | 0.10047 |
| -87.07201 | 0.09383 |
| -88.01358 | 0.08957 |
| -89.01087 | 0.08722 |
| -90.00905 | 0.08065 |
| -91.07657 | 0.07482 |
| -91.98087 | 0.07161 |
| -93.03716 | 0.06487 |
| -94.02625 | 0.06036 |
| -94.98283 | 0.05714 |
| -94.32591 | 0.06    |
| -93.50407 | 0.06764 |
| -92.48922 | 0.0702  |
| -91.43936 | 0.07646 |
| -90.39576 | 0.0801  |
| -89.29465 | 0.08629 |
| -88.22885 | 0.0924  |
| -87.07532 | 0.0976  |
| -86.08343 | 0.10309 |
| -84.94576 | 0.10703 |
| -83.96178 | 0.11982 |
| -82.85066 | 0.12558 |
| -81.83011 | 0.12885 |
| -80.79027 | 0.13383 |
| -79.78564 | 0.14103 |

|           |         |
|-----------|---------|
| -78.75853 | 0.14833 |
| -77.69509 | 0.15487 |
| -76.75363 | 0.16395 |
| -75.64795 | 0.17047 |
| -74.67775 | 0.17401 |
| -73.71823 | 0.18333 |
| -72.69534 | 0.1959  |
| -71.62183 | 0.19873 |
| -70.63496 | 0.20535 |
| -69.69708 | 0.21525 |
| -68.62259 | 0.22478 |
| -67.62669 | 0.23185 |
| -66.56674 | 0.24223 |
| -65.54671 | 0.25633 |
| -64.56345 | 0.26368 |
| -63.5542  | 0.27196 |
| -62.60118 | 0.29037 |
| -61.51572 | 0.30017 |
| -60.50289 | 0.31009 |
| -59.50718 | 0.32026 |
| -58.55504 | 0.33229 |
| -57.47793 | 0.34485 |
| -56.46869 | 0.35721 |
| -55.45901 | 0.37277 |
| -54.44607 | 0.38505 |
| -53.44912 | 0.39943 |
| -52.39102 | 0.41367 |
| -51.42972 | 0.43064 |
| -50.42557 | 0.44571 |
| -49.41855 | 0.46442 |
| -48.3976  | 0.47914 |
| -47.40983 | 0.50134 |
| -46.35972 | 0.5198  |
| -45.36527 | 0.5388  |
| -44.35619 | 0.558   |
| -43.35969 | 0.5823  |
| -42.38787 | 0.60276 |
| -41.32114 | 0.62697 |
| -40.33489 | 0.6509  |
| -39.33019 | 0.67753 |
| -38.31908 | 0.70552 |
| -37.32284 | 0.73523 |

|           |         |
|-----------|---------|
| -36.37809 | 0.76494 |
| -35.29982 | 0.79516 |
| -34.32049 | 0.82926 |
| -33.3316  | 0.86438 |
| -32.25522 | 0.90476 |
| -31.30458 | 0.94253 |
| -30.24724 | 0.98617 |
| -29.26955 | 1.02871 |
| -28.27173 | 1.0765  |
| -27.26784 | 1.12662 |
| -26.26051 | 1.18028 |
| -25.25685 | 1.23591 |
| -24.27253 | 1.2929  |
| -23.21878 | 1.35637 |
| -22.25388 | 1.42344 |
| -21.19958 | 1.49784 |
| -20.24019 | 1.57741 |
| -19.17544 | 1.65645 |
| -18.24564 | 1.74098 |
| -17.18248 | 1.83634 |
| -16.22301 | 1.93561 |
| -15.16497 | 2.03927 |
| -14.24358 | 2.15036 |
| -13.16477 | 2.26363 |
| -12.16562 | 2.39018 |
| -11.17853 | 2.52479 |
| -10.19391 | 2.66052 |
| -9.17174  | 2.80265 |
| -8.14022  | 2.95288 |
| -7.17553  | 3.11917 |
| -6.15573  | 3.28814 |
| -5.18054  | 3.46055 |
| -4.13278  | 3.62795 |
| -3.1827   | 3.79231 |
| -2.12381  | 3.93678 |
| -1.13002  | 4.09741 |
| -0.13785  | 4.24386 |
| 0.9133    | 4.39892 |
| 1.83635   | 4.54511 |
| 2.89153   | 4.64654 |
| 3.89481   | 4.71349 |
| 4.89034   | 4.73534 |

|          |         |
|----------|---------|
| 5.89181  | 4.72496 |
| 6.88382  | 4.68202 |
| 7.94482  | 4.60386 |
| 8.8865   | 4.48562 |
| 9.93935  | 4.3535  |
| 10.97223 | 4.19974 |
| 11.95982 | 4.03589 |
| 12.96052 | 3.86081 |
| 13.96953 | 3.66959 |
| 14.94474 | 3.47164 |
| 15.99148 | 3.28158 |
| 16.9443  | 3.10095 |
| 17.95501 | 2.92265 |
| 18.96488 | 2.75065 |
| 19.9319  | 2.58409 |
| 21.00434 | 2.43538 |
| 22.0077  | 2.28076 |
| 22.99657 | 2.14113 |

|          |         |
|----------|---------|
| 23.94833 | 2.00609 |
| 25.02775 | 1.88094 |
| 26.01601 | 1.77371 |
| 27.00566 | 1.66204 |
| 27.98632 | 1.55494 |
| 28.9703  | 1.45715 |
| 30.03485 | 1.37248 |
| 30.99245 | 1.2904  |
| 32.00068 | 1.21762 |
| 33.03637 | 1.1452  |
| 34.04229 | 1.07928 |
| 35.04164 | 1.01448 |
| 36.00521 | 0.96313 |
| 37.04391 | 0.91095 |
| 38.09278 | 0.86127 |
| 39.03829 | 0.81518 |
| 40.03555 | 0.76693 |
| 41.03902 | 0.73379 |

|          |         |
|----------|---------|
| 42.10322 | 0.69656 |
| 43.03459 | 0.65993 |
| 44.06172 | 0.63145 |
| 45.06133 | 0.59704 |
| 46.08964 | 0.57268 |
| 47.07918 | 0.54389 |
| 48.07579 | 0.52028 |
| 49.08813 | 0.49586 |
| 50.08111 | 0.46799 |
| 51.11874 | 0.45078 |
| 52.10852 | 0.4298  |
| 53.07642 | 0.41811 |
| 54.07637 | 0.39578 |
| 55.07817 | 0.38045 |
| 56.11104 | 0.36738 |
| 57.07129 | 0.34474 |
| 58.11557 | 0.33654 |
| 59.06548 | 0.31608 |

|          |         |
|----------|---------|
| 60.10743 | 0.3033  |
| 61.04407 | 0.28987 |
| 62.12131 | 0.28071 |
| 63.07644 | 0.2698  |
| 64.14612 | 0.25952 |
| 65.07927 | 0.24733 |
| 66.16156 | 0.23544 |
| 67.10335 | 0.22448 |
| 68.11498 | 0.21558 |
| 69.12271 | 0.20559 |
| 70.07087 | 0.19895 |
| 71.14119 | 0.18873 |
| 72.12301 | 0.17859 |
| 73.12613 | 0.17094 |
| 74.10376 | 0.16063 |
| 75.1029  | 0.15665 |
| 76.11334 | 0.14784 |
| 77.14167 | 0.14362 |

|          |         |
|----------|---------|
| 78.13895 | 0.13777 |
| 79.1416  | 0.12946 |
| 80.09756 | 0.11885 |
| 81.13042 | 0.11496 |
| 82.13862 | 0.10985 |
| 83.1091  | 0.10091 |
| 84.16039 | 0.0986  |
| 85.0978  | 0.09122 |
| 86.14556 | 0.08385 |
| 87.13978 | 0.07481 |
| 88.13189 | 0.0714  |
| 89.13004 | 0.06692 |
| 90.13743 | 0.05999 |
| 91.11466 | 0.05311 |
| 92.13104 | 0.04896 |
| 93.12065 | 0.04446 |
| 94.16621 | 0.03745 |

Data/Fig. 2b:

| Time (s) | MR (%)  |
|----------|---------|
| 30.05643 | 0.4682  |
| 29.37502 | 0.46885 |
| 28.681   | 0.46644 |
| 27.95382 | 0.46711 |
| 27.00879 | 0.46716 |
| 26.24791 | 0.46616 |
| 25.47474 | 0.46641 |
| 24.69569 | 0.46553 |
| 23.72096 | 0.46556 |
| 22.92368 | 0.46434 |
| 22.10845 | 0.45999 |
| 21.30723 | 0.46163 |
| 20.34044 | 0.46033 |
| 19.52799 | 0.45785 |
| 18.71162 | 0.45671 |
| 17.91359 | 0.45744 |
| 16.92095 | 0.45554 |
| 16.12825 | 0.4532  |
| 15.30988 | 0.45037 |
| 14.53971 | 0.44852 |
| 13.74106 | 0.4463  |

|          |         |
|----------|---------|
| 12.85039 | 0.44144 |
| 11.98291 | 0.43832 |
| 11.21898 | 0.43429 |
| 10.42279 | 0.43035 |
| 9.42739  | 0.4252  |
| 8.65314  | 0.42131 |
| 7.88109  | 0.4144  |
| 7.0235   | 0.40678 |
| 6.18513  | 0.40199 |
| 5.43572  | 0.393   |
| 4.65899  | 0.38354 |
| 3.79051  | 0.37483 |
| 2.90881  | 0.36215 |
| 2.13356  | 0.34767 |
| 1.37628  | 0.32776 |
| 0.45669  | 0.30498 |
| -0.27857 | 0.2669  |
| -1.02331 | 0.21951 |
| -1.95148 | 0.15996 |
| -2.72102 | 0.08149 |
| -3.48155 | 0.01639 |
| -4.32618 | 0.04549 |

|          |         |
|----------|---------|
| -5.20436 | 0.13745 |
| -5.93385 | 0.19645 |
| -6.69771 | 0.23975 |
| -7.63103 | 0.27204 |
| -8.3645  | 0.29387 |
| -9.29737 | 0.31737 |
| -10.0442 | 0.33357 |
| -10.7832 | 0.34245 |
| -11.5639 | 0.3641  |
| -12.4902 | 0.37453 |
| -13.2435 | 0.38379 |
| -13.9958 | 0.38503 |
| -14.8493 | 0.39658 |
| -15.6778 | 0.41014 |
| -16.4262 | 0.41715 |
| -17.2614 | 0.42089 |
| -18.0786 | 0.42169 |
| -18.8285 | 0.42433 |
| -19.5914 | 0.42925 |
| -20.5129 | 0.43261 |
| -21.2601 | 0.43497 |
| -22.0148 | 0.43512 |

|          |         |
|----------|---------|
| -22.9591 | 0.43786 |
| -23.6916 | 0.44132 |
| -24.4573 | 0.44423 |
| -25.3743 | 0.44584 |
| -26.1141 | 0.44728 |
| -26.8707 | 0.44965 |
| -27.7913 | 0.45227 |
| -28.5158 | 0.45366 |
| -29.0474 | 0.45603 |
| -29.4638 | 0.45555 |
| -29.6145 | 0.45592 |
| -29.6376 | 0.45546 |
| -29.49   | 0.45468 |
| -29.2616 | 0.45345 |
| -28.9485 | 0.45211 |
| -28.4122 | 0.45292 |
| -27.9079 | 0.45318 |
| -27.2855 | 0.45135 |
| -26.6161 | 0.4516  |
| -25.9632 | 0.44945 |
| -25.2397 | 0.44869 |
| -24.3938 | 0.44987 |

|          |         |
|----------|---------|
| -23.5282 | 0.44669 |
| -22.74   | 0.44488 |
| -21.9485 | 0.44254 |
| -21.1242 | 0.44098 |
| -20.0842 | 0.43976 |
| -19.2704 | 0.43773 |
| -18.4217 | 0.43453 |
| -17.5756 | 0.43206 |
| -16.6568 | 0.4305  |
| -15.7442 | 0.42771 |
| -14.9046 | 0.42307 |
| -14.0936 | 0.4186  |
| -13.108  | 0.41622 |
| -12.3193 | 0.41282 |
| -11.4988 | 0.40852 |
| -10.6819 | 0.40347 |
| -9.68373 | 0.39752 |
| -8.88373 | 0.39307 |
| -8.10605 | 0.3866  |
| -7.12687 | 0.38007 |
| -6.34226 | 0.37176 |
| -5.58493 | 0.36451 |

|          |         |
|----------|---------|
| -4.6281  | 0.35298 |
| -3.86494 | 0.34099 |
| -3.10934 | 0.33053 |
| -2.1584  | 0.31298 |
| -1.37874 | 0.29491 |
| -0.6023  | 0.26446 |
| 0.18444  | 0.22541 |
| 0.96908  | 0.17784 |
| 1.92176  | 0.09602 |

|         |         |
|---------|---------|
| 2.71133 | 0.02249 |
| 3.48155 | 0       |
| 4.23522 | 0.04983 |
| 5.081   | 0.13821 |
| 5.96184 | 0.19826 |
| 6.73439 | 0.26424 |
| 7.47866 | 0.28705 |
| 8.41961 | 0.30513 |
| 9.17887 | 0.33519 |

|          |         |
|----------|---------|
| 9.93606  | 0.35447 |
| 10.86122 | 0.3686  |
| 11.61229 | 0.38904 |
| 12.34522 | 0.39863 |
| 13.19664 | 0.40401 |
| 14.0688  | 0.41641 |
| 14.82359 | 0.42163 |
| 15.60251 | 0.42631 |
| 16.54233 | 0.43145 |

|          |         |
|----------|---------|
| 17.28784 | 0.43759 |
| 18.04335 | 0.44106 |
| 18.80285 | 0.44453 |
| 19.75507 | 0.44724 |
| 20.52622 | 0.45086 |
| 21.29116 | 0.45393 |
| 22.05341 | 0.45604 |
| 23.01349 | 0.4609  |
| 23.78683 | 0.46122 |

|          |         |
|----------|---------|
| 24.56325 | 0.46346 |
| 25.3225  | 0.46406 |
| 26.25432 | 0.46582 |
| 27.00757 | 0.46643 |
| 27.75011 | 0.46741 |
| 28.51056 | 0.46871 |

Data/Fig. 2c:

| Magnetic field (mT) | Sensitivity (T-1) |
|---------------------|-------------------|
| 94.91328            | -0.04392          |
| 93.84174            | -0.03873          |
| 92.74648            | -0.04423          |
| 91.77263            | -0.0251           |
| 90.69894            | -0.05311          |
| 89.69698            | -0.06894          |
| 88.67176            | -0.04414          |
| 87.67789            | -0.09339          |
| 86.65827            | -0.03895          |
| 85.61667            | -0.06851          |
| 84.6386             | -0.02032          |
| 83.64674            | -0.05394          |
| 82.56681            | -0.10188          |
| 81.63532            | -0.04408          |
| 80.57959            | -0.0866           |
| 79.56911            | -0.03945          |
| 78.56959            | -0.06889          |
| 77.56226            | -0.13515          |
| 76.57551            | 0.00687           |
| 75.52825            | -0.10848          |
| 74.60259            | -0.0813           |
| 73.51663            | -0.0522           |
| 72.52235            | -0.09579          |
| 71.52782            | -0.05039          |
| 70.52908            | -0.07669          |
| 69.52781            | -0.15362          |
| 68.45425            | -0.02999          |
| 67.49792            | -0.12681          |
| 66.47658            | -0.06983          |
| 65.47705            | -0.08798          |

|          |          |
|----------|----------|
| 64.46086 | -0.11577 |
| 63.47186 | -0.08269 |
| 62.44425 | -0.14428 |
| 61.44143 | -0.10888 |
| 60.42169 | -0.08344 |
| 59.42412 | -0.15136 |
| 58.37138 | -0.13371 |
| 57.41741 | -0.10776 |
| 56.35039 | -0.09629 |
| 55.37626 | -0.14594 |
| 54.37246 | -0.12855 |
| 53.38442 | -0.15789 |
| 52.39028 | -0.1547  |
| 51.32894 | -0.14254 |
| 50.39154 | -0.17654 |
| 49.30312 | -0.15813 |
| 48.29991 | -0.19816 |
| 47.30071 | -0.12922 |
| 46.28111 | -0.24036 |
| 45.36701 | -0.19943 |
| 44.28949 | -0.2217  |
| 43.34312 | -0.23527 |
| 42.28134 | -0.24467 |
| 41.3022  | -0.26486 |
| 40.30518 | -0.19794 |
| 39.27316 | -0.28179 |
| 38.32643 | -0.29431 |
| 37.25312 | -0.22756 |
| 36.29543 | -0.32199 |
| 35.24366 | -0.31761 |
| 34.30502 | -0.36392 |

|          |          |
|----------|----------|
| 33.24622 | -0.34045 |
| 32.32366 | -0.39598 |
| 31.2331  | -0.33934 |
| 30.28981 | -0.49248 |
| 29.23316 | -0.39913 |
| 28.26003 | -0.48603 |
| 27.20643 | -0.53358 |
| 26.22497 | -0.53761 |
| 25.18263 | -0.53979 |
| 24.23332 | -0.59912 |
| 23.21996 | -0.63528 |
| 22.22268 | -0.71318 |
| 21.16697 | -0.69449 |
| 20.22804 | -0.80271 |
| 19.17852 | -0.75765 |
| 18.19256 | -0.87325 |
| 17.19097 | -0.92731 |
| 16.18679 | -0.95938 |
| 15.19185 | -1.02995 |
| 14.15313 | -1.02405 |
| 13.18802 | -1.18918 |
| 12.13127 | -1.16048 |
| 11.20356 | -1.36762 |
| 10.15254 | -1.26807 |
| 9.1981   | -1.41546 |
| 8.14441  | -1.35357 |
| 7.16114  | -1.59859 |
| 6.16572  | -1.59784 |
| 5.11887  | -1.47538 |
| 4.1882   | -1.76037 |
| 3.14318  | -1.45155 |

|          |          |
|----------|----------|
| 2.15739  | -1.37768 |
| 1.16711  | -1.46977 |
| 0.12025  | -1.31804 |
| -0.86747 | -1.44969 |
| -1.85261 | -1.38519 |
| -2.84023 | -1.07548 |
| -3.82264 | -0.62233 |
| -4.89034 | -0.12055 |
| -5.82413 | 0.12307  |
| -6.88228 | 0.41232  |
| -7.82715 | 0.6824   |
| -8.87448 | 0.82949  |
| -9.81302 | 1.45193  |
| -10.8813 | 1.50654  |
| -11.8799 | 1.64228  |
| -12.8696 | 1.75794  |
| -13.8587 | 1.71971  |
| -14.8346 | 1.81994  |
| -15.9019 | 1.77044  |
| -16.8467 | 1.90652  |
| -17.8955 | 1.48905  |
| -18.8793 | 1.6151   |
| -19.8936 | 1.68404  |
| -20.8933 | 1.54079  |
| -21.8979 | 1.4527   |
| -22.8936 | 1.33267  |
| -23.8909 | 1.18625  |
| -24.9048 | 1.23604  |
| -25.9081 | 1.12517  |
| -26.8939 | 1.2443   |
| -27.8389 | 1.05728  |

|          |         |
|----------|---------|
| -28.9143 | 0.9484  |
| -29.9052 | 0.84731 |
| -30.8957 | 0.79294 |
| -31.903  | 0.68301 |
| -32.9017 | 0.61171 |
| -33.9424 | 0.66728 |
| -34.8744 | 0.66421 |
| -35.9364 | 0.52391 |
| -36.8811 | 0.55142 |
| -37.9342 | 0.46025 |
| -38.9174 | 0.43558 |
| -39.8907 | 0.42135 |
| -40.965  | 0.35037 |
| -41.9173 | 0.35594 |
| -42.9687 | 0.3262  |
| -43.9024 | 0.34411 |
| -44.9302 | 0.2856  |
| -45.9111 | 0.31345 |
| -46.9209 | 0.22741 |
| -47.9031 | 0.26114 |
| -48.9523 | 0.17255 |
| -49.9411 | 0.2365  |
| -50.9799 | 0.18258 |
| -51.9241 | 0.20689 |
| -52.9746 | 0.15589 |
| -53.9036 | 0.18756 |
| -54.9592 | 0.16301 |
| -55.9452 | 0.21342 |
| -56.9234 | 0.0872  |
| -57.964  | 0.18105 |
| -58.9255 | 0.12361 |



|          |          |
|----------|----------|
| -59.9856 | 0.172    |
| -60.9674 | 0.08547  |
| -61.9643 | 0.09033  |
| -62.9415 | 0.17155  |
| -63.935  | 0.08725  |
| -64.9925 | 0.10531  |
| -65.9444 | 0.10044  |
| -67.0003 | 0.15353  |
| -67.9441 | 0.08174  |
| -69.011  | 0.08472  |
| -69.9841 | 0.105    |
| -70.9686 | 0.05469  |
| -71.9492 | 0.09807  |
| -72.9225 | 0.10762  |
| -73.9965 | 0.03355  |
| -74.9793 | 0.10414  |
| -75.9746 | 0.04144  |
| -76.9725 | 0.06889  |
| -77.952  | 0.09107  |
| -79.0123 | 0.04583  |
| -80.0025 | 0.11285  |
| -81.0007 | 0.04863  |
| -82.0323 | 0.10253  |
| -83.0077 | 0.02603  |
| -83.9714 | 0.04977  |
| -85.0398 | 0.06826  |
| -85.9835 | 0.05696  |
| -87.072  | 0.06089  |
| -88.0136 | 0.04522  |
| -89.0109 | 0.02361  |
| -90.0091 | 0.06569  |
| -91.0766 | 0.05458  |
| -91.9809 | 0.03553  |
| -93.0372 | 0.06378  |
| -94.0263 | 0.04553  |
| -94.9828 | 0.03363  |
| -94.3259 | -0.00278 |
| -93.5041 | 0.09283  |
| -92.4892 | 0.02527  |
| -91.4394 | 0.05952  |
| -90.3958 | 0.0349   |
| -89.2947 | 0.05618  |

|          |         |
|----------|---------|
| -88.2289 | 0.05724 |
| -87.0753 | 0.04503 |
| -86.0834 | 0.05528 |
| -84.9458 | 0.03464 |
| -83.9618 | 0.12975 |
| -82.8507 | 0.05184 |
| -81.8301 | 0.03194 |
| -80.7903 | 0.04789 |
| -79.7856 | 0.0715  |
| -78.7585 | 0.07096 |
| -77.6951 | 0.0614  |
| -76.7536 | 0.09629 |
| -75.648  | 0.0589  |
| -74.6778 | 0.0364  |
| -73.7182 | 0.09694 |
| -72.6953 | 0.12269 |
| -71.6218 | 0.02632 |
| -70.635  | 0.06691 |
| -69.6971 | 0.10536 |
| -68.6226 | 0.08851 |
| -67.6267 | 0.07082 |
| -66.5667 | 0.09769 |
| -65.5467 | 0.13782 |
| -64.5635 | 0.07464 |
| -63.5542 | 0.08181 |
| -62.6012 | 0.19261 |
| -61.5157 | 0.08999 |
| -60.5029 | 0.0976  |
| -59.5072 | 0.10186 |
| -58.555  | 0.12589 |
| -57.4779 | 0.11626 |
| -56.4687 | 0.12203 |
| -55.459  | 0.15349 |
| -54.4461 | 0.12076 |
| -53.4491 | 0.14369 |
| -52.391  | 0.13399 |
| -51.4297 | 0.17577 |
| -50.4256 | 0.14944 |
| -49.4186 | 0.18496 |
| -48.3976 | 0.14353 |
| -47.4098 | 0.22363 |
| -46.3597 | 0.17483 |

|          |         |
|----------|---------|
| -45.3653 | 0.19009 |
| -44.3562 | 0.18916 |
| -43.3597 | 0.24249 |
| -42.3879 | 0.20927 |
| -41.3211 | 0.22551 |
| -40.3349 | 0.24111 |
| -39.3302 | 0.26319 |
| -38.3191 | 0.27492 |
| -37.3228 | 0.29606 |
| -36.3781 | 0.31212 |
| -35.2998 | 0.27803 |
| -34.3205 | 0.34531 |
| -33.3316 | 0.35214 |
| -32.2552 | 0.37178 |
| -31.3046 | 0.3936  |
| -30.2472 | 0.40864 |
| -29.2696 | 0.43076 |
| -28.2717 | 0.47383 |
| -27.2678 | 0.49365 |
| -26.2605 | 0.52646 |
| -25.2569 | 0.54755 |
| -24.2725 | 0.57157 |
| -23.2188 | 0.59424 |
| -22.2539 | 0.68533 |
| -21.1996 | 0.69527 |
| -20.2402 | 0.81652 |
| -19.1754 | 0.73026 |
| -18.2456 | 0.89355 |
| -17.1825 | 0.88076 |
| -16.223  | 1.01506 |
| -15.165  | 0.96013 |
| -14.2436 | 1.18027 |
| -13.1648 | 1.02673 |
| -12.1656 | 1.23701 |
| -11.1785 | 1.33013 |
| -10.1939 | 1.34276 |
| -9.17174 | 1.35258 |
| -8.14022 | 1.41463 |
| -7.17553 | 1.67159 |
| -6.15573 | 1.60418 |
| -5.18054 | 1.70882 |
| -4.13278 | 1.54172 |

|          |          |
|----------|----------|
| -3.1827  | 1.66683  |
| -2.12381 | 1.31267  |
| -1.13002 | 1.55266  |
| -0.13785 | 1.416    |
| 0.9133   | 1.41297  |
| 1.83635  | 1.51491  |
| 2.89153  | 0.91859  |
| 3.89481  | 0.63724  |
| 4.89034  | 0.20959  |
| 5.89181  | -0.09895 |
| 6.88382  | -0.41348 |
| 7.94482  | -0.70427 |
| 8.8865   | -1.20177 |
| 9.93935  | -1.20246 |
| 10.97223 | -1.4287  |
| 11.95982 | -1.59468 |
| 12.96052 | -1.68456 |
| 13.96953 | -1.82803 |
| 14.94474 | -1.96172 |
| 15.99148 | -1.75803 |
| 16.9443  | -1.83873 |
| 17.95501 | -1.71406 |
| 18.96488 | -1.65761 |
| 19.9319  | -1.67899 |
| 21.00434 | -1.35365 |
| 22.0077  | -1.50668 |
| 22.99657 | -1.3824  |
| 23.94833 | -1.39092 |
| 25.02775 | -1.13809 |
| 26.01601 | -1.06606 |
| 27.00566 | -1.10997 |
| 27.98632 | -1.07542 |
| 28.9703  | -0.97956 |
| 30.03485 | -0.78458 |
| 30.99245 | -0.84614 |
| 32.00068 | -0.71318 |
| 33.03637 | -0.6914  |
| 34.04229 | -0.64831 |
| 35.04164 | -0.64192 |
| 36.00521 | -0.52777 |
| 37.04391 | -0.49788 |
| 38.09278 | -0.46955 |

|          |          |
|----------|----------|
| 39.03829 | -0.48352 |
| 40.03555 | -0.48012 |
| 41.03902 | -0.32786 |
| 42.10322 | -0.34745 |
| 43.03459 | -0.39068 |
| 44.06172 | -0.27557 |
| 45.06133 | -0.34218 |
| 46.08964 | -0.23552 |
| 47.07918 | -0.28939 |
| 48.07579 | -0.2357  |
| 49.08813 | -0.24    |
| 50.08111 | -0.27933 |
| 51.11874 | -0.16514 |
| 52.10852 | -0.21109 |
| 53.07642 | -0.12025 |
| 54.07637 | -0.22247 |
| 55.07817 | -0.15246 |
| 56.11104 | -0.12603 |
| 57.07129 | -0.23496 |
| 58.11557 | -0.07824 |
| 59.06548 | -0.21469 |
| 60.10743 | -0.12228 |
| 61.04407 | -0.143   |
| 62.12131 | -0.08482 |
| 63.07644 | -0.11387 |
| 64.14612 | -0.09593 |
| 65.07927 | -0.13033 |
| 66.16156 | -0.10955 |
| 67.10335 | -0.1161  |
| 68.11498 | -0.08783 |
| 69.12271 | -0.09892 |
| 70.07087 | -0.06992 |
| 71.14119 | -0.09531 |
| 72.12301 | -0.10311 |
| 73.12613 | -0.07608 |
| 74.10376 | -0.10534 |
| 75.1029  | -0.0397  |
| 76.11334 | -0.08707 |
| 77.14167 | -0.04098 |
| 78.13895 | -0.05859 |
| 79.1416  | -0.08279 |
| 80.09756 | -0.11088 |

|          |          |
|----------|----------|
| 81.13042 | -0.03759 |
| 82.13862 | -0.0506  |
| 83.1091  | -0.09206 |

|          |          |
|----------|----------|
| 84.16039 | -0.02198 |
| 85.0978  | -0.07865 |
| 86.14556 | -0.07024 |

|          |          |
|----------|----------|
| 87.13978 | -0.09084 |
| 88.13189 | -0.03433 |
| 89.13004 | -0.0449  |

|          |          |
|----------|----------|
| 90.13743 | -0.06875 |
| 91.11466 | -0.07034 |
| 92.13104 | -0.04081 |

|          |          |
|----------|----------|
| 93.12065 | -0.04545 |
| 94.16621 | -0.06705 |

Data/Fig. 2d:

| Magnetic field (mT) | Sensitivity (T-1) |
|---------------------|-------------------|
| 27.95382            | -0.00923          |
| 27.00879            | -4.75E-04         |
| 26.24791            | 0.01305           |
| 25.47474            | -0.00317          |
| 24.69569            | 0.0112            |
| 23.72096            | -2.47E-04         |
| 22.92368            | 0.01515           |
| 22.10845            | 0.05311           |
| 21.30723            | -0.02036          |
| 20.34044            | 0.01339           |
| 19.52799            | 0.03035           |
| 18.71162            | 0.01399           |
| 17.91359            | -0.0091           |
| 16.92095            | 0.01901           |
| 16.12825            | 0.02939           |
| 15.30988            | 0.03442           |
| 14.53971            | 0.02391           |
| 13.74106            | 0.02763           |
| 12.85039            | 0.05438           |
| 11.98291            | 0.03574           |
| 11.21898            | 0.05253           |
| 10.42279            | 0.04932           |
| 9.42739             | 0.05152           |
| 8.65314             | 0.04996           |
| 7.88109             | 0.08924           |
| 7.0235              | 0.08845           |
| 6.18513             | 0.05694           |

|          |          |
|----------|----------|
| 5.43572  | 0.11942  |
| 4.65899  | 0.12141  |
| 3.79051  | 0.09981  |
| 2.90881  | 0.14335  |
| 2.13356  | 0.18614  |
| 1.37628  | 0.26199  |
| 0.45669  | 0.24699  |
| -0.27857 | 0.51658  |
| -1.02331 | 0.63488  |
| -1.95148 | 0.64054  |
| -2.72102 | 1.01895  |
| -3.48155 | 0.85578  |
| -4.32618 | -0.34432 |
| -5.20436 | -1.04572 |
| -5.93385 | -0.80719 |
| -6.69771 | -0.56557 |
| -7.63103 | -0.34504 |
| -8.3645  | -0.29671 |
| -9.29737 | -0.25108 |
| -10.0442 | -0.2162  |
| -10.7832 | -0.11973 |
| -11.5639 | -0.27632 |
| -12.4902 | -0.11223 |
| -13.2435 | -0.12245 |
| -13.9958 | -0.01646 |
| -14.8493 | -0.13471 |
| -15.6778 | -0.16306 |
| -16.4262 | -0.09324 |

|          |          |
|----------|----------|
| -17.2614 | -0.04465 |
| -18.0786 | -0.00969 |
| -18.8285 | -0.03514 |
| -19.5914 | -0.06416 |
| -20.5129 | -0.03633 |
| -21.2601 | -0.03144 |
| -22.0148 | -0.00199 |
| -22.9591 | -0.02891 |
| -23.6916 | -0.047   |
| -24.4573 | -0.03783 |
| -25.3743 | -0.0175  |
| -26.1141 | -0.01928 |
| -26.8707 | -0.03118 |
| -27.7913 | -0.02835 |
| -27.9079 | 0.00512  |
| -27.2855 | -0.02939 |
| -26.6161 | 0.0038   |
| -25.9632 | -0.03286 |
| -25.2397 | -0.01041 |
| -24.3938 | 0.01393  |
| -23.5282 | -0.03664 |
| -22.74   | -0.02278 |
| -21.9485 | -0.02945 |
| -21.1242 | -0.0189  |
| -20.0842 | -0.01169 |
| -19.2704 | -0.02479 |
| -18.4217 | -0.03757 |
| -17.5756 | -0.02901 |

|          |          |
|----------|----------|
| -16.6568 | -0.0169  |
| -15.7442 | -0.03049 |
| -14.9046 | -0.05503 |
| -14.0936 | -0.0549  |
| -13.108  | -0.024   |
| -12.3193 | -0.04292 |
| -11.4988 | -0.05221 |
| -10.6819 | -0.06158 |
| -9.68373 | -0.05938 |
| -8.88373 | -0.05541 |
| -8.10605 | -0.08287 |
| -7.12687 | -0.06641 |
| -6.34226 | -0.10554 |
| -5.58493 | -0.09538 |
| -4.6281  | -0.12007 |
| -3.86494 | -0.15656 |
| -3.10934 | -0.13807 |
| -2.1584  | -0.18393 |
| -1.37874 | -0.23107 |
| -0.6023  | -0.39116 |
| 0.18444  | -0.49519 |
| 0.96908  | -0.60521 |
| 1.92176  | -0.85805 |
| 2.71133  | -0.93108 |
| 3.48155  | -0.29196 |
| 4.23522  | 0.6609   |
| 5.081    | 1.04345  |
| 5.96184  | 0.68037  |

|          |         |
|----------|---------|
| 6.73439  | 0.85176 |
| 7.47866  | 0.30563 |
| 8.41961  | 0.19157 |
| 9.17887  | 0.39458 |
| 9.93606  | 0.25378 |
| 10.86122 | 0.15214 |
| 11.61229 | 0.27115 |
| 12.34522 | 0.13029 |
| 13.19664 | 0.06294 |
| 14.0688  | 0.14153 |
| 14.82359 | 0.0689  |
| 15.60251 | 0.05983 |
| 16.54233 | 0.05447 |
| 17.28784 | 0.08204 |
| 18.04335 | 0.04573 |
| 18.80285 | 0.04544 |
| 19.75507 | 0.02832 |
| 20.52622 | 0.04672 |
| 21.29116 | 0.04003 |
| 22.05341 | 0.0275  |
| 23.01349 | 0.05041 |
| 23.78683 | 0.00415 |
| 24.56325 | 0.02864 |
| 25.3225  | 0.00782 |
| 26.25432 | 0.01886 |
| 27.00757 | 0.0081  |
| 27.75011 | 0.01307 |

Data/Fig. 2e:

| 15.4μA         |                             | 33.4μA         |                             | 0.16mA         |                             | 0.34mA         |                             | 0.72mA         |                             | 3.36mA         |                             |
|----------------|-----------------------------|----------------|-----------------------------|----------------|-----------------------------|----------------|-----------------------------|----------------|-----------------------------|----------------|-----------------------------|
| Frequency (Hz) | Noise Power Density (Ω/√Hz) | Frequency (Hz) | Noise Power Density (Ω/√Hz) | Frequency (Hz) | Noise Power Density (Ω/√Hz) | Frequency (Hz) | Noise Power Density (Ω/√Hz) | Frequency (Hz) | Noise Power Density (Ω/√Hz) | Frequency (Hz) | Noise Power Density (Ω/√Hz) |
| 0.07726        | 0.00168                     | 0.07713        | 0.00129                     | 0.07742        | 0.00163                     | 0.07707        | 8.04E-04                    | 0.07809        | 9.27E-04                    | 0.07729        | 6.18E-04                    |
| 0.24895        | 0.00186                     | 0.24852        | 0.00113                     | 0.24946        | 5.53E-04                    | 0.24835        | 2.95E-04                    | 0.25162        | 3.05E-04                    | 0.24903        | 1.96E-04                    |
| 0.42063        | 0.00256                     | 0.41991        | 0.00121                     | 0.4215         | 2.71E-04                    | 0.41963        | 2.31E-04                    | 0.42515        | 1.77E-04                    | 0.42078        | 1.13E-04                    |
| 0.59232        | 0.00202                     | 0.59131        | 0.00105                     | 0.59354        | 2.10E-04                    | 0.5909         | 1.52E-04                    | 0.59868        | 1.67E-04                    | 0.59252        | 7.02E-05                    |

|         |         |         |          |         |          |         |          |         |          |         |          |
|---------|---------|---------|----------|---------|----------|---------|----------|---------|----------|---------|----------|
| 0.76401 | 0.00202 | 0.7627  | 0.00119  | 0.76558 | 2.65E-04 | 0.76218 | 1.14E-04 | 0.77221 | 1.05E-04 | 0.76427 | 5.36E-05 |
| 0.9357  | 0.00212 | 0.9341  | 0.00152  | 0.93762 | 2.59E-04 | 0.93346 | 1.10E-04 | 0.94574 | 1.02E-04 | 0.93602 | 4.45E-05 |
| 1.10738 | 0.00249 | 1.10549 | 8.72E-04 | 1.10966 | 2.62E-04 | 1.10473 | 1.15E-04 | 1.11927 | 6.77E-05 | 1.10776 | 4.22E-05 |
| 1.27907 | 0.0024  | 1.27688 | 8.35E-04 | 1.2817  | 2.31E-04 | 1.27601 | 9.88E-05 | 1.2928  | 5.38E-05 | 1.27951 | 4.75E-05 |
| 1.45076 | 0.00272 | 1.44828 | 0.0011   | 1.45375 | 2.34E-04 | 1.44729 | 1.15E-04 | 1.46633 | 5.58E-05 | 1.45125 | 3.71E-05 |
| 1.62245 | 0.00202 | 1.61967 | 0.00103  | 1.62579 | 1.98E-04 | 1.61857 | 1.03E-04 | 1.63985 | 6.28E-05 | 1.623   | 5.07E-05 |
| 1.79413 | 0.00211 | 1.79107 | 0.00103  | 1.79783 | 2.01E-04 | 1.78984 | 1.32E-04 | 1.81338 | 5.58E-05 | 1.79475 | 3.65E-05 |
| 1.96582 | 0.00243 | 1.96246 | 0.0011   | 1.96987 | 2.41E-04 | 1.96112 | 9.98E-05 | 1.98691 | 5.54E-05 | 1.96649 | 4.88E-05 |
| 2.13751 | 0.00194 | 2.13385 | 0.00117  | 2.14191 | 2.45E-04 | 2.1324  | 9.79E-05 | 2.16044 | 6.40E-05 | 2.13824 | 2.17E-05 |
| 2.30919 | 0.00227 | 2.30525 | 9.29E-04 | 2.31395 | 2.02E-04 | 2.30367 | 8.85E-05 | 2.33397 | 4.25E-05 | 2.30999 | 2.35E-05 |
| 2.48088 | 0.0017  | 2.47664 | 9.91E-04 | 2.48599 | 2.29E-04 | 2.47495 | 1.25E-04 | 2.5075  | 6.51E-05 | 2.48173 | 3.38E-05 |
| 2.65257 | 0.00218 | 2.64803 | 0.00112  | 2.65803 | 1.61E-04 | 2.64623 | 1.05E-04 | 2.68103 | 6.83E-05 | 2.65348 | 3.54E-05 |
| 2.82426 | 0.00201 | 2.81943 | 9.06E-04 | 2.83007 | 2.17E-04 | 2.8175  | 1.15E-04 | 2.85456 | 7.25E-05 | 2.82522 | 3.46E-05 |
| 2.99594 | 0.0019  | 2.99082 | 0.0012   | 3.00211 | 1.89E-04 | 2.98878 | 1.24E-04 | 3.02809 | 5.05E-05 | 2.99697 | 2.73E-05 |
| 3.16763 | 0.00233 | 3.16222 | 0.00118  | 3.17415 | 2.77E-04 | 3.16006 | 1.38E-04 | 3.20162 | 7.36E-05 | 3.16872 | 3.45E-05 |
| 3.33932 | 0.00194 | 3.33361 | 0.00108  | 3.34619 | 2.45E-04 | 3.33133 | 1.02E-04 | 3.37515 | 5.58E-05 | 3.34046 | 2.79E-05 |
| 3.51101 | 0.00214 | 3.505   | 0.00105  | 3.51824 | 1.74E-04 | 3.50261 | 9.33E-05 | 3.54868 | 4.98E-05 | 3.51221 | 3.00E-05 |
| 3.68269 | 0.00274 | 3.6764  | 8.93E-04 | 3.69028 | 2.47E-04 | 3.67389 | 6.75E-05 | 3.72221 | 6.28E-05 | 3.68395 | 2.78E-05 |
| 3.85438 | 0.0023  | 3.84779 | 0.00112  | 3.86232 | 2.18E-04 | 3.84516 | 1.23E-04 | 3.89574 | 5.97E-05 | 3.8557  | 2.51E-05 |
| 4.02607 | 0.00193 | 4.01919 | 0.0012   | 4.03436 | 2.18E-04 | 4.01644 | 8.22E-05 | 4.06927 | 5.79E-05 | 4.02745 | 3.55E-05 |
| 4.19776 | 0.00208 | 4.19058 | 0.0011   | 4.2064  | 2.55E-04 | 4.18772 | 1.08E-04 | 4.2428  | 5.81E-05 | 4.19919 | 2.33E-05 |
| 4.36944 | 0.0025  | 4.36197 | 0.00111  | 4.37844 | 2.54E-04 | 4.35899 | 1.26E-04 | 4.41633 | 5.67E-05 | 4.37094 | 2.98E-05 |
| 4.54113 | 0.00175 | 4.53337 | 0.00143  | 4.55048 | 2.31E-04 | 4.53027 | 1.08E-04 | 4.58986 | 4.29E-05 | 4.54269 | 2.41E-05 |
| 4.71282 | 0.00293 | 4.70476 | 0.00103  | 4.72252 | 2.42E-04 | 4.70155 | 6.70E-05 | 4.76339 | 5.18E-05 | 4.71443 | 3.17E-05 |
| 4.8845  | 0.00191 | 4.87616 | 7.38E-04 | 4.89456 | 2.53E-04 | 4.87282 | 9.81E-05 | 4.93692 | 7.28E-05 | 4.88618 | 3.04E-05 |
| 5.05619 | 0.0026  | 5.04755 | 0.00117  | 5.0666  | 2.29E-04 | 5.0441  | 9.85E-05 | 5.11045 | 4.60E-05 | 5.05792 | 2.91E-05 |
| 5.22788 | 0.00233 | 5.21894 | 0.00128  | 5.23864 | 2.11E-04 | 5.21538 | 8.72E-05 | 5.28398 | 4.74E-05 | 5.22967 | 3.08E-05 |
| 5.39957 | 0.00272 | 5.39034 | 0.00108  | 5.41068 | 2.92E-04 | 5.38665 | 1.07E-04 | 5.45751 | 4.14E-05 | 5.40142 | 3.08E-05 |
| 5.57125 | 0.00261 | 5.56173 | 0.00101  | 5.58273 | 1.82E-04 | 5.55793 | 1.27E-04 | 5.63104 | 4.96E-05 | 5.57316 | 2.48E-05 |
| 5.74294 | 0.00261 | 5.73312 | 8.60E-04 | 5.75477 | 1.80E-04 | 5.72921 | 1.21E-04 | 5.80457 | 4.49E-05 | 5.74491 | 2.58E-05 |
| 5.91463 | 0.00197 | 5.90452 | 0.00111  | 5.92681 | 2.39E-04 | 5.90048 | 1.19E-04 | 5.97809 | 4.42E-05 | 5.91665 | 2.60E-05 |
| 6.08632 | 0.00217 | 6.07591 | 0.00123  | 6.09885 | 2.98E-04 | 6.07176 | 1.31E-04 | 6.15162 | 6.13E-05 | 6.0884  | 2.82E-05 |
| 6.258   | 0.00302 | 6.24731 | 0.00134  | 6.27089 | 1.16E-04 | 6.24304 | 1.13E-04 | 6.32515 | 5.35E-05 | 6.26015 | 2.51E-05 |
| 6.42969 | 0.00219 | 6.4187  | 0.00108  | 6.44293 | 1.89E-04 | 6.41431 | 8.64E-05 | 6.49868 | 5.67E-05 | 6.43189 | 2.79E-05 |
| 6.60138 | 0.00187 | 6.59009 | 8.87E-04 | 6.61497 | 1.84E-04 | 6.58559 | 1.33E-04 | 6.67221 | 4.27E-05 | 6.60364 | 2.92E-05 |
| 6.77307 | 0.0021  | 6.76149 | 0.00109  | 6.78701 | 1.89E-04 | 6.75687 | 1.40E-04 | 6.84574 | 4.03E-05 | 6.77539 | 3.31E-05 |
| 6.94475 | 0.0023  | 6.93288 | 0.001    | 6.95905 | 1.99E-04 | 6.92814 | 8.40E-05 | 7.01927 | 4.43E-05 | 6.94713 | 2.66E-05 |
| 7.11644 | 0.0023  | 7.10428 | 0.00105  | 7.13109 | 2.60E-04 | 7.09942 | 9.04E-05 | 7.1928  | 5.59E-05 | 7.11888 | 2.94E-05 |
| 7.28813 | 0.00208 | 7.27567 | 0.00132  | 7.30313 | 2.27E-04 | 7.2707  | 1.27E-04 | 7.36633 | 5.84E-05 | 7.29062 | 2.81E-05 |
| 7.45981 | 0.00217 | 7.44706 | 8.69E-04 | 7.47517 | 2.42E-04 | 7.44197 | 1.12E-04 | 7.53986 | 4.60E-05 | 7.46237 | 2.38E-05 |
| 7.6315  | 0.00286 | 7.61846 | 0.00113  | 7.64722 | 3.22E-04 | 7.61325 | 9.91E-05 | 7.71339 | 4.00E-05 | 7.63412 | 2.09E-05 |
| 7.80319 | 0.00267 | 7.78985 | 0.00123  | 7.81926 | 2.82E-04 | 7.78453 | 1.06E-04 | 7.88692 | 5.20E-05 | 7.80586 | 2.03E-05 |

|          |         |          |          |          |          |          |          |          |          |          |          |
|----------|---------|----------|----------|----------|----------|----------|----------|----------|----------|----------|----------|
| 7.97488  | 0.00203 | 7.96124  | 8.78E-04 | 7.9913   | 2.17E-04 | 7.9558   | 9.94E-05 | 8.06045  | 4.97E-05 | 7.97761  | 2.30E-05 |
| 8.14656  | 0.00204 | 8.13264  | 0.001    | 8.16334  | 2.13E-04 | 8.12708  | 1.22E-04 | 8.23398  | 5.20E-05 | 8.14935  | 2.52E-05 |
| 8.31825  | 0.00252 | 8.30403  | 9.04E-04 | 8.33538  | 2.12E-04 | 8.29836  | 1.14E-04 | 8.40751  | 5.74E-05 | 8.3211   | 2.75E-05 |
| 8.48994  | 0.00174 | 8.47543  | 9.33E-04 | 8.50742  | 2.05E-04 | 8.46963  | 9.92E-05 | 8.58104  | 4.47E-05 | 8.49285  | 2.71E-05 |
| 8.66163  | 0.00253 | 8.64682  | 9.17E-04 | 8.67946  | 2.37E-04 | 8.64091  | 1.04E-04 | 8.75457  | 6.12E-05 | 8.66459  | 2.77E-05 |
| 8.83331  | 0.00252 | 8.81821  | 0.00109  | 8.8515   | 1.73E-04 | 8.81219  | 1.47E-04 | 8.9281   | 5.33E-05 | 8.83634  | 3.14E-05 |
| 9.005    | 0.00293 | 8.98961  | 0.0011   | 9.02354  | 1.81E-04 | 8.98346  | 1.29E-04 | 9.10163  | 6.61E-05 | 9.00809  | 3.87E-05 |
| 9.17669  | 0.0025  | 9.161    | 0.00102  | 9.19558  | 1.99E-04 | 9.15474  | 1.55E-04 | 9.27516  | 6.27E-05 | 9.17983  | 2.12E-05 |
| 9.34838  | 0.00189 | 9.3324   | 9.72E-04 | 9.36762  | 2.23E-04 | 9.32602  | 1.21E-04 | 9.44869  | 5.52E-05 | 9.35158  | 2.81E-05 |
| 9.52006  | 0.00217 | 9.50379  | 0.00108  | 9.53966  | 1.89E-04 | 9.4973   | 9.17E-05 | 9.62222  | 3.57E-05 | 9.52332  | 2.69E-05 |
| 9.69175  | 0.00246 | 9.67518  | 0.00154  | 9.71171  | 2.74E-04 | 9.66857  | 9.63E-05 | 9.79575  | 7.31E-05 | 9.69507  | 2.42E-05 |
| 9.86344  | 0.00186 | 9.84658  | 8.27E-04 | 9.88375  | 2.16E-04 | 9.83985  | 1.15E-04 | 9.96928  | 6.04E-05 | 9.86682  | 1.98E-05 |
| 10.03512 | 0.00219 | 10.01797 | 0.00124  | 10.05579 | 2.88E-04 | 10.01113 | 1.20E-04 | 10.14281 | 5.33E-05 | 10.03856 | 2.27E-05 |
| 10.20681 | 0.002   | 10.18936 | 0.00108  | 10.22783 | 1.99E-04 | 10.1824  | 8.26E-05 | 10.31633 | 6.35E-05 | 10.21031 | 1.84E-05 |
| 10.3785  | 0.00257 | 10.36076 | 0.00113  | 10.39987 | 3.26E-04 | 10.35368 | 1.20E-04 | 10.48986 | 4.66E-05 | 10.38205 | 3.14E-05 |
| 10.55019 | 0.00189 | 10.53215 | 8.51E-04 | 10.57191 | 2.18E-04 | 10.52496 | 1.08E-04 | 10.66339 | 4.74E-05 | 10.5538  | 2.78E-05 |
| 10.72187 | 0.00241 | 10.70355 | 0.00109  | 10.74395 | 2.64E-04 | 10.69623 | 1.01E-04 | 10.83692 | 7.62E-05 | 10.72555 | 2.56E-05 |
| 10.89356 | 0.00328 | 10.87494 | 8.98E-04 | 10.91599 | 2.61E-04 | 10.86751 | 1.28E-04 | 11.01045 | 4.79E-05 | 10.89729 | 2.75E-05 |
| 11.06525 | 0.00263 | 11.04633 | 0.00149  | 11.08803 | 2.23E-04 | 11.03879 | 9.30E-05 | 11.18398 | 4.73E-05 | 11.06904 | 2.80E-05 |
| 11.23694 | 0.00249 | 11.21773 | 8.21E-04 | 11.26007 | 2.12E-04 | 11.21006 | 1.53E-04 | 11.35751 | 4.34E-05 | 11.24079 | 2.36E-05 |
| 11.40862 | 0.0021  | 11.38912 | 0.00121  | 11.43211 | 2.27E-04 | 11.38134 | 1.71E-04 | 11.53104 | 5.44E-05 | 11.41253 | 2.76E-05 |
| 11.58031 | 0.00214 | 11.56052 | 0.00107  | 11.60415 | 3.09E-04 | 11.55262 | 9.68E-05 | 11.70457 | 4.98E-05 | 11.58428 | 2.90E-05 |
| 11.752   | 0.00182 | 11.73191 | 0.00117  | 11.7762  | 2.47E-04 | 11.72389 | 1.11E-04 | 11.8781  | 4.90E-05 | 11.75602 | 2.44E-05 |
| 11.92369 | 0.00198 | 11.9033  | 0.0011   | 11.94824 | 1.77E-04 | 11.89517 | 1.09E-04 | 12.05163 | 5.22E-05 | 11.92777 | 2.43E-05 |
| 12.09537 | 0.00265 | 12.0747  | 0.00107  | 12.12028 | 2.61E-04 | 12.06645 | 1.18E-04 | 12.22516 | 4.18E-05 | 12.09952 | 3.01E-05 |
| 12.26706 | 0.00184 | 12.24609 | 0.0011   | 12.29232 | 2.59E-04 | 12.23772 | 9.93E-05 | 12.39869 | 6.01E-05 | 12.27126 | 3.28E-05 |
| 12.43875 | 0.00225 | 12.41748 | 6.77E-04 | 12.46436 | 2.37E-04 | 12.409   | 9.45E-05 | 12.57222 | 4.48E-05 | 12.44301 | 2.88E-05 |
| 12.61043 | 0.0023  | 12.58888 | 8.75E-04 | 12.6364  | 2.54E-04 | 12.58028 | 1.14E-04 | 12.74575 | 4.98E-05 | 12.61475 | 2.97E-05 |
| 12.78212 | 0.00222 | 12.76027 | 8.86E-04 | 12.80844 | 2.27E-04 | 12.75155 | 1.31E-04 | 12.91928 | 5.28E-05 | 12.7865  | 3.61E-05 |
| 12.95381 | 0.00223 | 12.93167 | 0.00107  | 12.98048 | 2.21E-04 | 12.92283 | 1.30E-04 | 13.09281 | 3.74E-05 | 12.95825 | 2.81E-05 |
| 13.1255  | 0.00263 | 13.10306 | 0.00124  | 13.15252 | 1.96E-04 | 13.09411 | 1.10E-04 | 13.26634 | 5.96E-05 | 13.12999 | 2.86E-05 |
| 13.29718 | 0.00276 | 13.27445 | 9.77E-04 | 13.32456 | 2.16E-04 | 13.26538 | 1.06E-04 | 13.43987 | 6.78E-05 | 13.30174 | 3.33E-05 |
| 13.46887 | 0.00244 | 13.44585 | 0.00117  | 13.4966  | 3.13E-04 | 13.43666 | 8.44E-05 | 13.6134  | 8.33E-05 | 13.47349 | 2.59E-05 |
| 13.64056 | 0.0031  | 13.61724 | 0.0012   | 13.66864 | 2.93E-04 | 13.60794 | 1.15E-04 | 13.78693 | 5.11E-05 | 13.64523 | 2.01E-05 |
| 13.81225 | 0.00221 | 13.78864 | 9.72E-04 | 13.84069 | 1.84E-04 | 13.77921 | 1.28E-04 | 13.96046 | 7.33E-05 | 13.81698 | 3.24E-05 |
| 13.98393 | 0.00292 | 13.96003 | 0.00111  | 14.01273 | 2.77E-04 | 13.95049 | 1.06E-04 | 14.13399 | 5.76E-05 | 13.98872 | 1.96E-05 |
| 14.15562 | 0.00192 | 14.13142 | 0.00109  | 14.18477 | 3.41E-04 | 14.12177 | 1.18E-04 | 14.30752 | 4.71E-05 | 14.16047 | 2.24E-05 |
| 14.32731 | 0.00223 | 14.30282 | 0.00114  | 14.35681 | 2.71E-04 | 14.29304 | 1.48E-04 | 14.48105 | 4.10E-05 | 14.33222 | 2.37E-05 |
| 14.499   | 0.00178 | 14.47421 | 8.73E-04 | 14.52885 | 2.34E-04 | 14.46432 | 1.35E-04 | 14.65457 | 6.17E-05 | 14.50396 | 2.34E-05 |
| 14.67068 | 0.00169 | 14.6456  | 0.00137  | 14.70089 | 2.35E-04 | 14.6356  | 1.36E-04 | 14.8281  | 4.42E-05 | 14.67571 | 2.31E-05 |
| 14.84237 | 0.00263 | 14.817   | 0.0012   | 14.87293 | 1.95E-04 | 14.80687 | 1.58E-04 |          |          | 14.84745 | 2.90E-05 |
|          |         | 14.98839 | 9.57E-04 |          |          | 14.97815 | 1.02E-04 |          |          |          |          |

Data/Fig. 2f:

| 13.8 $\mu$ A   |                                                   | 29.9 $\mu$ A   |                                                   | 0.14mA         |                                                   | 0.30mA         |                                                   | 0.65mA         |                                                   | 1.40mA         |                                                   |
|----------------|---------------------------------------------------|----------------|---------------------------------------------------|----------------|---------------------------------------------------|----------------|---------------------------------------------------|----------------|---------------------------------------------------|----------------|---------------------------------------------------|
| Frequency (Hz) | Noise Power Density ( $\Omega/\sqrt{\text{Hz}}$ ) | Frequency (Hz) | Noise Power Density ( $\Omega/\sqrt{\text{Hz}}$ ) | Frequency (Hz) | Noise Power Density ( $\Omega/\sqrt{\text{Hz}}$ ) | Frequency (Hz) | Noise Power Density ( $\Omega/\sqrt{\text{Hz}}$ ) | Frequency (Hz) | Noise Power Density ( $\Omega/\sqrt{\text{Hz}}$ ) | Frequency (Hz) | Noise Power Density ( $\Omega/\sqrt{\text{Hz}}$ ) |
| 0.07517        | 0.00119                                           | 0.07787        | 6.49E-04                                          | 0.08198        | 9.60E-04                                          | 0.07368        | 5.39E-04                                          | 0.07506        | 8.75E-04                                          | 0.07799        | 3.55E-04                                          |
| 0.2422         | 0.00116                                           | 0.25092        | 6.01E-04                                          | 0.26414        | 2.14E-04                                          | 0.2374         | 2.32E-04                                          | 0.24185        | 1.32E-04                                          | 0.25132        | 1.65E-04                                          |
| 0.40924        | 0.00141                                           | 0.42396        | 6.85E-04                                          | 0.44631        | 1.28E-04                                          | 0.40113        | 2.04E-04                                          | 0.40864        | 6.06E-05                                          | 0.42464        | 1.08E-04                                          |
| 0.57628        | 0.00108                                           | 0.59701        | 5.98E-04                                          | 0.62848        | 1.43E-04                                          | 0.56485        | 1.54E-04                                          | 0.57543        | 4.54E-05                                          | 0.59796        | 6.00E-05                                          |
| 0.74331        | 0.00125                                           | 0.77005        | 7.03E-04                                          | 0.81065        | 1.55E-04                                          | 0.72858        | 1.08E-04                                          | 0.74222        | 4.24E-05                                          | 0.77128        | 4.23E-05                                          |
| 0.91035        | 0.0011                                            | 0.9431         | 6.34E-04                                          | 0.99282        | 1.25E-04                                          | 0.8923         | 6.36E-05                                          | 0.90901        | 3.13E-05                                          | 0.9446         | 3.77E-05                                          |
| 1.07739        | 0.00101                                           | 1.11614        | 5.26E-04                                          | 1.17499        | 1.43E-04                                          | 1.05603        | 6.25E-05                                          | 1.0758         | 3.92E-05                                          | 1.11792        | 3.17E-05                                          |
| 1.24442        | 0.0013                                            | 1.28919        | 6.43E-04                                          | 1.35715        | 1.58E-04                                          | 1.21975        | 6.93E-05                                          | 1.24259        | 3.97E-05                                          | 1.29124        | 4.00E-05                                          |
| 1.41146        | 0.00129                                           | 1.46224        | 7.88E-04                                          | 1.53932        | 1.42E-04                                          | 1.38348        | 6.30E-05                                          | 1.40938        | 3.47E-05                                          | 1.46456        | 2.38E-05                                          |
| 1.5785         | 0.00129                                           | 1.63528        | 5.41E-04                                          | 1.72149        | 1.39E-04                                          | 1.5472         | 6.51E-05                                          | 1.57617        | 3.19E-05                                          | 1.63788        | 2.44E-05                                          |
| 1.74553        | 9.56E-04                                          | 1.80833        | 6.50E-04                                          | 1.90366        | 1.59E-04                                          | 1.71093        | 5.54E-05                                          | 1.74296        | 2.46E-05                                          | 1.8112         | 2.59E-05                                          |
| 1.91257        | 0.00132                                           | 1.98137        | 5.58E-04                                          | 2.08583        | 1.49E-04                                          | 1.87466        | 7.06E-05                                          | 1.90975        | 4.04E-05                                          | 1.98452        | 3.18E-05                                          |
| 2.07961        | 0.00156                                           | 2.15442        | 6.22E-04                                          | 2.26799        | 1.38E-04                                          | 2.03838        | 4.76E-05                                          | 2.07654        | 2.60E-05                                          | 2.15784        | 2.17E-05                                          |
| 2.24664        | 0.0019                                            | 2.32746        | 5.66E-04                                          | 2.45016        | 8.89E-05                                          | 2.20211        | 5.23E-05                                          | 2.24333        | 3.25E-05                                          | 2.33116        | 2.68E-05                                          |
| 2.41368        | 0.00104                                           | 2.50051        | 5.11E-04                                          | 2.63233        | 1.20E-04                                          | 2.36583        | 5.58E-05                                          | 2.41012        | 3.46E-05                                          | 2.50448        | 2.36E-05                                          |
| 2.58072        | 0.00111                                           | 2.67356        | 4.68E-04                                          | 2.8145         | 1.14E-04                                          | 2.52956        | 6.48E-05                                          | 2.57691        | 3.52E-05                                          | 2.67781        | 2.36E-05                                          |
| 2.74776        | 0.00121                                           | 2.8466         | 6.99E-04                                          | 2.99667        | 1.40E-04                                          | 2.69328        | 5.94E-05                                          | 2.7437         | 3.36E-05                                          | 2.85113        | 1.94E-05                                          |
| 2.91479        | 0.00138                                           | 3.01965        | 8.35E-04                                          | 3.17884        | 9.23E-05                                          | 2.85701        | 5.44E-05                                          | 2.91049        | 2.59E-05                                          | 3.02445        | 2.05E-05                                          |
| 3.08183        | 0.00128                                           | 3.19269        | 4.88E-04                                          | 3.361          | 9.89E-05                                          | 3.02073        | 6.62E-05                                          | 3.07728        | 3.34E-05                                          | 3.19777        | 2.65E-05                                          |
| 3.24887        | 0.00111                                           | 3.36574        | 6.01E-04                                          | 3.54317        | 1.21E-04                                          | 3.18446        | 6.52E-05                                          | 3.24407        | 2.42E-05                                          | 3.37109        | 2.35E-05                                          |
| 3.4159         | 0.00114                                           | 3.53878        | 6.41E-04                                          | 3.72534        | 1.50E-04                                          | 3.34818        | 7.58E-05                                          | 3.41086        | 3.22E-05                                          | 3.54441        | 2.63E-05                                          |
| 3.58294        | 0.00145                                           | 3.71183        | 6.61E-04                                          | 3.90751        | 1.13E-04                                          | 3.51191        | 5.01E-05                                          | 3.57765        | 2.52E-05                                          | 3.71773        | 2.49E-05                                          |
| 3.74998        | 0.00134                                           | 3.88488        | 6.62E-04                                          | 4.08968        | 1.53E-04                                          | 3.67563        | 4.78E-05                                          | 3.74444        | 3.69E-05                                          | 3.89105        | 2.18E-05                                          |
| 3.91701        | 0.00131                                           | 4.05792        | 5.69E-04                                          | 4.27185        | 1.27E-04                                          | 3.83936        | 5.04E-05                                          | 3.91123        | 2.68E-05                                          | 4.06437        | 2.04E-05                                          |
| 4.08405        | 0.00121                                           | 4.23097        | 7.63E-04                                          | 4.45401        | 1.33E-04                                          | 4.00308        | 7.22E-05                                          | 4.07802        | 2.40E-05                                          | 4.23769        | 2.27E-05                                          |
| 4.25109        | 0.0013                                            | 4.40401        | 4.94E-04                                          | 4.63618        | 1.17E-04                                          | 4.16681        | 4.70E-05                                          | 4.24481        | 2.36E-05                                          | 4.41101        | 1.92E-05                                          |
| 4.41812        | 7.84E-04                                          | 4.57706        | 6.71E-04                                          | 4.81835        | 1.53E-04                                          | 4.33054        | 4.48E-05                                          | 4.4116         | 3.09E-05                                          | 4.58433        | 1.99E-05                                          |
| 4.58516        | 0.00121                                           | 4.7501         | 5.98E-04                                          | 5.00052        | 1.61E-04                                          | 4.49426        | 5.75E-05                                          | 4.57839        | 2.87E-05                                          | 4.75765        | 2.49E-05                                          |
| 4.7522         | 0.00107                                           | 4.92315        | 5.56E-04                                          | 5.18269        | 9.56E-05                                          | 4.65799        | 5.01E-05                                          | 4.74518        | 2.78E-05                                          | 4.93097        | 2.05E-05                                          |
| 4.91923        | 0.00152                                           | 5.0962         | 4.98E-04                                          | 5.36485        | 1.32E-04                                          | 4.82171        | 5.81E-05                                          | 4.91197        | 3.67E-05                                          | 5.1043         | 1.32E-05                                          |
| 5.08627        | 0.00134                                           | 5.26924        | 6.73E-04                                          | 5.54702        | 1.45E-04                                          | 4.98544        | 6.75E-05                                          | 5.07876        | 2.92E-05                                          | 5.27762        | 1.61E-05                                          |
| 5.25331        | 0.00133                                           | 5.44229        | 7.03E-04                                          | 5.72919        | 9.99E-05                                          | 5.14916        | 6.04E-05                                          | 5.24555        | 2.40E-05                                          | 5.45094        | 2.24E-05                                          |
| 5.42034        | 0.00163                                           | 5.61533        | 5.85E-04                                          | 5.91136        | 1.84E-04                                          | 5.31289        | 5.65E-05                                          | 5.41234        | 3.92E-05                                          | 5.62426        | 2.52E-05                                          |
| 5.58738        | 0.0011                                            | 5.78838        | 6.23E-04                                          | 6.09353        | 9.22E-05                                          | 5.47661        | 4.68E-05                                          | 5.57913        | 3.94E-05                                          | 5.79758        | 1.36E-05                                          |
| 5.75442        | 0.00121                                           | 5.96142        | 6.44E-04                                          | 6.2757         | 1.51E-04                                          | 5.64034        | 5.73E-05                                          | 5.74592        | 3.11E-05                                          | 5.9709         | 2.48E-05                                          |
| 5.92145        | 0.0012                                            | 6.13447        | 5.78E-04                                          | 6.45786        | 1.26E-04                                          | 5.80406        | 7.53E-05                                          | 5.91271        | 2.76E-05                                          | 6.14422        | 2.27E-05                                          |
| 6.08849        | 0.00168                                           | 6.30752        | 5.20E-04                                          | 6.64003        | 9.60E-05                                          | 5.96779        | 7.27E-05                                          | 6.0795         | 3.00E-05                                          | 6.31754        | 2.00E-05                                          |
| 6.25553        | 0.00136                                           | 6.48056        | 4.93E-04                                          | 6.8222         | 1.38E-04                                          | 6.13151        | 6.03E-05                                          | 6.24629        | 3.64E-05                                          | 6.49086        | 2.05E-05                                          |
| 6.42256        | 0.00106                                           | 6.65361        | 6.10E-04                                          | 7.00437        | 1.68E-04                                          | 6.29524        | 4.81E-05                                          | 6.41308        | 2.84E-05                                          | 6.66418        | 1.73E-05                                          |

|          |          |          |          |          |          |          |          |          |          |          |          |
|----------|----------|----------|----------|----------|----------|----------|----------|----------|----------|----------|----------|
| 6.5896   | 0.00103  | 6.82665  | 5.32E-04 | 7.18654  | 9.39E-05 | 6.45896  | 6.07E-05 | 6.57987  | 3.26E-05 | 6.8375   | 1.94E-05 |
| 6.75664  | 0.00134  | 6.9997   | 5.90E-04 | 7.36871  | 1.54E-04 | 6.62269  | 6.10E-05 | 6.74666  | 3.68E-05 | 7.01082  | 1.33E-05 |
| 6.92367  | 0.00169  | 7.17274  | 5.29E-04 | 7.55087  | 1.17E-04 | 6.78642  | 5.69E-05 | 6.91345  | 3.37E-05 | 7.18414  | 1.65E-05 |
| 7.09071  | 0.0011   | 7.34579  | 5.58E-04 | 7.73304  | 1.43E-04 | 6.95014  | 6.68E-05 | 7.08024  | 2.07E-05 | 7.35746  | 2.41E-05 |
| 7.25775  | 9.42E-04 | 7.51884  | 4.75E-04 | 7.91521  | 1.34E-04 | 7.11387  | 5.70E-05 | 7.24703  | 3.16E-05 | 7.53079  | 2.28E-05 |
| 7.42479  | 0.00118  | 7.69188  | 4.41E-04 | 8.09738  | 1.39E-04 | 7.27759  | 6.92E-05 | 7.41382  | 2.97E-05 | 7.70411  | 1.59E-05 |
| 7.59182  | 0.00155  | 7.86493  | 5.76E-04 | 8.27955  | 1.14E-04 | 7.44132  | 5.72E-05 | 7.58061  | 2.66E-05 | 7.87743  | 1.92E-05 |
| 7.75886  | 0.00104  | 8.03797  | 6.22E-04 | 8.46172  | 1.08E-04 | 7.60504  | 5.86E-05 | 7.7474   | 3.63E-05 | 8.05075  | 2.18E-05 |
| 7.9259   | 0.00135  | 8.21102  | 3.92E-04 | 8.64388  | 1.80E-04 | 7.76877  | 6.04E-05 | 7.91419  | 4.17E-05 | 8.22407  | 2.29E-05 |
| 8.09293  | 0.0012   | 8.38406  | 4.63E-04 | 8.82605  | 1.37E-04 | 7.93249  | 5.57E-05 | 8.08098  | 3.49E-05 | 8.39739  | 2.19E-05 |
| 8.25997  | 0.00139  | 8.55711  | 8.14E-04 | 9.00822  | 1.16E-04 | 8.09622  | 6.06E-05 | 8.24777  | 3.08E-05 | 8.57071  | 1.82E-05 |
| 8.42701  | 0.00172  | 8.73016  | 6.18E-04 | 9.19039  | 9.63E-05 | 8.25994  | 7.92E-05 | 8.41456  | 2.66E-05 | 8.74403  | 1.46E-05 |
| 8.59404  | 0.00124  | 8.9032   | 6.60E-04 | 9.37256  | 1.17E-04 | 8.42367  | 5.36E-05 | 8.58135  | 4.32E-05 | 8.91735  | 1.53E-05 |
| 8.76108  | 9.17E-04 | 9.07625  | 5.37E-04 | 9.55472  | 1.15E-04 | 8.58739  | 7.26E-05 | 8.74814  | 2.03E-05 | 9.09067  | 2.13E-05 |
| 8.92812  | 9.27E-04 | 9.24929  | 6.12E-04 | 9.73689  | 1.12E-04 | 8.75112  | 7.78E-05 | 8.91493  | 3.48E-05 | 9.26399  | 2.12E-05 |
| 9.09515  | 0.00169  | 9.42234  | 5.72E-04 | 9.91906  | 9.52E-05 | 8.91485  | 6.14E-05 | 9.08172  | 3.53E-05 | 9.43731  | 2.37E-05 |
| 9.26219  | 0.00122  | 9.59538  | 6.57E-04 | 10.10123 | 1.27E-04 | 9.07857  | 6.13E-05 | 9.24851  | 2.72E-05 | 9.61063  | 2.70E-05 |
| 9.42923  | 0.0013   | 9.76843  | 4.47E-04 | 10.2834  | 1.37E-04 | 9.2423   | 6.09E-05 | 9.4153   | 3.30E-05 | 9.78395  | 1.74E-05 |
| 9.59626  | 0.00164  | 9.94148  | 6.26E-04 | 10.46557 | 1.36E-04 | 9.40602  | 5.34E-05 | 9.58209  | 3.86E-05 | 9.95728  | 2.17E-05 |
| 9.7633   | 0.00111  | 10.11452 | 6.23E-04 | 10.64773 | 1.29E-04 | 9.56975  | 6.49E-05 | 9.74888  | 3.42E-05 | 10.1306  | 2.17E-05 |
| 9.93034  | 0.00143  | 10.28757 | 5.85E-04 | 10.8299  | 1.79E-04 | 9.73347  | 4.82E-05 | 9.91567  | 2.63E-05 | 10.30392 | 2.17E-05 |
| 10.09737 | 0.00151  | 10.46061 | 6.44E-04 | 11.01207 | 1.40E-04 | 9.8972   | 6.08E-05 | 10.08246 | 2.63E-05 | 10.47724 | 3.30E-05 |
| 10.26441 | 0.00146  | 10.63366 | 5.34E-04 | 11.19424 | 1.22E-04 | 10.06092 | 6.88E-05 | 10.24925 | 3.39E-05 | 10.65056 | 2.21E-05 |
| 10.43145 | 0.0011   | 10.8067  | 6.65E-04 | 11.37641 | 1.09E-04 | 10.22465 | 6.87E-05 | 10.41604 | 3.87E-05 | 10.82388 | 2.53E-05 |
| 10.59848 | 0.00116  | 10.97975 | 6.63E-04 | 11.55858 | 1.22E-04 | 10.38837 | 6.30E-05 | 10.58283 | 2.47E-05 | 10.9972  | 1.66E-05 |
| 10.76552 | 0.00141  | 11.1528  | 5.64E-04 | 11.74074 | 1.25E-04 | 10.5521  | 6.97E-05 | 10.74962 | 2.63E-05 | 11.17052 | 2.69E-05 |
| 10.93256 | 0.00166  | 11.32584 | 6.35E-04 | 11.92291 | 1.08E-04 | 10.71582 | 5.34E-05 | 10.91641 | 3.74E-05 | 11.34384 | 2.08E-05 |
| 11.09959 | 0.0015   | 11.49889 | 5.65E-04 | 12.10508 | 1.31E-04 | 10.87955 | 5.55E-05 | 11.0832  | 3.20E-05 | 11.51716 | 2.28E-05 |
| 11.26663 | 0.00152  | 11.67193 | 7.55E-04 | 12.28725 | 9.14E-05 | 11.04327 | 5.45E-05 | 11.24999 | 2.83E-05 | 11.69048 | 1.66E-05 |
| 11.43367 | 0.00121  | 11.84498 | 7.19E-04 | 12.46942 | 1.37E-04 | 11.207   | 7.54E-05 | 11.41678 | 3.93E-05 | 11.8638  | 1.48E-05 |
| 11.6007  | 0.00122  | 12.01802 | 5.48E-04 | 12.65158 | 1.37E-04 | 11.37073 | 7.04E-05 | 11.58357 | 3.17E-05 | 12.03712 | 1.99E-05 |
| 11.76774 | 0.00177  | 12.19107 | 7.82E-04 | 12.83375 | 1.36E-04 | 11.53445 | 7.07E-05 | 11.75036 | 2.44E-05 | 12.21044 | 1.75E-05 |
| 11.93478 | 0.00139  | 12.36412 | 7.55E-04 | 13.01592 | 1.17E-04 | 11.69818 | 5.31E-05 | 11.91715 | 2.99E-05 | 12.38377 | 1.89E-05 |
| 12.10182 | 0.00144  | 12.53716 | 6.68E-04 | 13.19809 | 1.23E-04 | 11.8619  | 6.86E-05 | 12.08394 | 3.05E-05 | 12.55709 | 2.31E-05 |
| 12.26885 | 0.00134  | 12.71021 | 6.03E-04 | 13.38026 | 1.41E-04 | 12.02563 | 5.85E-05 | 12.25073 | 3.40E-05 | 12.73041 | 2.13E-05 |
| 12.43589 | 0.00118  | 12.88325 | 5.48E-04 | 13.56243 | 1.33E-04 | 12.18935 | 6.09E-05 | 12.41752 | 3.76E-05 | 12.90373 | 2.17E-05 |
| 12.60293 | 0.00112  | 13.0563  | 8.11E-04 | 13.74459 | 1.02E-04 | 12.35308 | 6.42E-05 | 12.58431 | 2.94E-05 | 13.07705 | 2.43E-05 |
| 12.76996 | 0.00128  | 13.22934 | 5.38E-04 | 13.92676 | 1.50E-04 | 12.5168  | 5.05E-05 | 12.75111 | 2.75E-05 | 13.25037 | 2.13E-05 |
| 12.937   | 0.00147  | 13.40239 | 5.14E-04 | 14.10893 | 1.72E-04 | 12.68053 | 6.52E-05 | 12.9179  | 3.41E-05 | 13.42369 | 1.84E-05 |
| 13.10404 | 8.41E-04 | 13.57544 | 7.12E-04 | 14.2911  | 1.44E-04 | 12.84425 | 7.75E-05 | 13.08469 | 3.27E-05 | 13.59701 | 2.39E-05 |
| 13.27107 | 0.0017   | 13.74848 | 6.58E-04 | 14.47327 | 1.65E-04 | 13.00798 | 6.75E-05 | 13.25148 | 3.74E-05 | 13.77033 | 2.30E-05 |
| 13.43811 | 0.0015   | 13.92153 | 7.79E-04 | 14.65544 | 1.39E-04 | 13.1717  | 7.49E-05 | 13.41827 | 3.33E-05 | 13.94365 | 2.72E-05 |

|          |         |          |          |         |          |          |          |          |          |          |          |
|----------|---------|----------|----------|---------|----------|----------|----------|----------|----------|----------|----------|
| 13.60515 | 0.00136 | 14.09457 | 7.99E-04 | 14.8376 | 1.25E-04 | 13.33543 | 6.19E-05 | 13.58506 | 4.39E-05 | 14.11697 | 2.33E-05 |
| 13.77218 | 0.00111 | 14.26762 | 5.47E-04 |         |          | 13.49915 | 5.91E-05 | 13.75185 | 3.48E-05 | 14.29029 | 2.76E-05 |
| 13.93922 | 0.00177 | 14.44066 | 7.57E-04 |         |          | 13.66288 | 7.60E-05 | 13.91864 | 3.00E-05 | 14.46361 | 2.22E-05 |
| 14.10626 | 0.00128 | 14.61371 | 6.05E-04 |         |          | 13.82661 | 7.22E-05 | 14.08543 | 1.87E-05 | 14.63693 | 1.53E-05 |
| 14.27329 | 0.00173 | 14.78676 | 6.65E-04 |         |          | 13.99033 | 5.98E-05 | 14.25222 | 2.85E-05 | 14.81026 | 2.60E-05 |
| 14.44033 | 0.00112 | 14.9598  | 3.69E-04 |         |          | 14.15406 | 6.89E-05 | 14.41901 | 3.05E-05 | 14.98358 | 2.28E-05 |
| 14.60737 | 0.00129 |          |          |         |          | 14.31778 | 8.69E-05 | 14.5858  | 2.49E-05 |          |          |
| 14.7744  | 0.00138 |          |          |         |          | 14.48151 | 6.97E-05 | 14.75259 | 3.70E-05 |          |          |
| 14.94144 | 0.00129 |          |          |         |          | 14.64523 | 7.76E-05 | 14.91938 | 3.18E-05 |          |          |
|          |         |          |          |         |          | 14.80896 | 5.04E-05 |          |          |          |          |
|          |         |          |          |         |          | 14.97268 | 6.55E-05 |          |          |          |          |

Data/Fig. 3a:

| Temperature (°C) | MR (%)  |
|------------------|---------|
| 20               | 4.73534 |
| 40               | 4.61586 |
| 60               | 4.36194 |
| 80               | 4.29694 |

Data/Fig. 3b:

| Temperature (°C) | MR (%) |
|------------------|--------|
| 20               | 0.4682 |
| 40               | 0.4716 |
| 60               | 0.4781 |
| 80               | 0.4625 |

Data/Fig. 4b:

| Original            |         | Recycled            |         |
|---------------------|---------|---------------------|---------|
| Magnetic field (mT) | MR (%)  | Magnetic field (mT) | MR (%)  |
| 99.63779            | 0.02516 | 98.04259            | 0.03965 |
| 97.72162            | 0.03766 | 95.98103            | 0.05005 |
| 95.93271            | 0.04899 | 93.72946            | 0.06113 |
| 93.84365            | 0.05953 | 91.65881            | 0.07235 |
| 91.90554            | 0.07376 | 89.38354            | 0.08441 |
| 89.68732            | 0.09134 | 87.34524            | 0.09875 |
| 87.69482            | 0.10776 | 85.10837            | 0.1121  |
| 85.40294            | 0.12304 | 83.07322            | 0.12486 |
| 83.44266            | 0.13652 | 80.99234            | 0.13843 |
| 81.22059            | 0.158   | 78.75964            | 0.1527  |
| 79.23735            | 0.17886 | 76.79659            | 0.16758 |
| 77.14486            | 0.19582 | 74.65885            | 0.18182 |

|          |         |          |         |
|----------|---------|----------|---------|
| 75.10873 | 0.21863 | 72.6977  | 0.19928 |
| 72.94371 | 0.24386 | 70.67253 | 0.21654 |
| 71.01058 | 0.25929 | 68.61121 | 0.23567 |
| 68.82209 | 0.28103 | 66.69128 | 0.25383 |
| 66.83557 | 0.30775 | 64.56946 | 0.27425 |
| 64.86073 | 0.33378 | 62.55467 | 0.29656 |
| 62.865   | 0.35898 | 60.56086 | 0.32066 |
| 60.84542 | 0.38579 | 58.54924 | 0.34534 |
| 58.77576 | 0.41898 | 56.53084 | 0.37152 |
| 56.75761 | 0.45193 | 54.3748  | 0.39859 |
| 54.64183 | 0.48708 | 52.47745 | 0.42937 |
| 52.74655 | 0.52898 | 50.40611 | 0.46346 |
| 50.18671 | 0.56693 | 48.51658 | 0.49882 |
| 48.16822 | 0.61795 | 46.38427 | 0.5363  |

|          |         |          |         |
|----------|---------|----------|---------|
| 46.01384 | 0.66246 | 44.37986 | 0.57853 |
| 44.11351 | 0.71531 | 42.38564 | 0.62312 |
| 41.96096 | 0.77268 | 40.24351 | 0.67088 |
| 40.10329 | 0.8334  | 38.35546 | 0.72463 |
| 37.95798 | 0.89779 | 36.26233 | 0.78452 |
| 35.98892 | 0.96596 | 34.26057 | 0.85012 |
| 34.04146 | 1.04288 | 32.25155 | 0.92266 |
| 31.96699 | 1.13358 | 30.26145 | 1.0037  |
| 29.96087 | 1.22467 | 28.17826 | 1.0961  |
| 27.9643  | 1.32612 | 26.21255 | 1.1961  |
| 25.84728 | 1.43482 | 24.33453 | 1.30675 |
| 23.95374 | 1.55173 | 22.16714 | 1.42944 |
| 21.8306  | 1.68969 | 20.2452  | 1.56731 |
| 19.9123  | 1.84279 | 18.11431 | 1.72766 |
| 17.88285 | 2.01158 | 16.19585 | 1.90658 |
| 15.85273 | 2.20227 | 14.04987 | 2.10275 |
| 13.94536 | 2.4062  | 12.13829 | 2.31335 |
| 11.77875 | 2.63433 | 10.13998 | 2.54189 |
| 9.88603  | 2.88799 | 8.1534   | 2.7844  |
| 7.75153  | 3.14746 | 6.24558  | 3.03451 |
| 5.8329   | 3.42029 | 4.08266  | 3.29633 |
| 3.81561  | 3.68572 | 2.17443  | 3.5698  |
| 1.79585  | 3.94042 | 0.03968  | 3.86224 |
| -0.20587 | 4.19415 | -1.87317 | 4.23444 |
| -2.24246 | 4.40423 | -3.85834 | 4.49501 |
| -4.24204 | 4.51284 | -5.81091 | 4.58907 |
| -6.22122 | 4.51214 | -7.93229 | 4.4649  |
| -8.23458 | 4.41764 | -9.84577 | 4.14931 |
| -10.1946 | 4.27214 | -11.9467 | 3.7869  |
| -12.2851 | 4.07892 | -13.9117 | 3.42655 |
| -14.2142 | 3.84323 | -15.9154 | 3.08963 |
| -16.2229 | 3.59341 | -17.9155 | 2.75552 |
| -18.3157 | 3.35586 | -19.9064 | 2.44883 |
| -20.1816 | 3.09925 | -22.0062 | 2.15765 |
| -22.2975 | 2.8494  | -23.9673 | 1.91336 |
| -24.1752 | 2.62545 | -25.9204 | 1.69193 |
| -26.3089 | 2.39576 | -27.9363 | 1.49061 |
| -28.2094 | 2.17246 | -29.8983 | 1.31863 |
| -30.3492 | 1.97646 | -32.0142 | 1.17199 |
| -32.2267 | 1.79429 | -33.8867 | 1.04628 |
| -34.3255 | 1.62736 | -35.9642 | 0.93455 |
| -36.195  | 1.47668 | -37.8409 | 0.84021 |

|          |         |          |         |
|----------|---------|----------|---------|
| -38.2849 | 1.34475 | -39.9819 | 0.75551 |
| -40.2526 | 1.22934 | -41.9706 | 0.6844  |
| -42.2825 | 1.12136 | -43.9573 | 0.62538 |
| -44.1846 | 1.0281  | -45.945  | 0.57073 |
| -46.3342 | 0.94495 | -47.9417 | 0.51939 |
| -48.2708 | 0.87152 | -49.9244 | 0.47832 |
| -50.2759 | 0.80607 | -51.9211 | 0.43996 |
| -52.262  | 0.74092 | -53.9119 | 0.40474 |
| -54.3816 | 0.68614 | -55.8918 | 0.37208 |
| -56.34   | 0.62787 | -58.0103 | 0.34259 |
| -58.2869 | 0.58079 | -59.8917 | 0.31522 |
| -60.3046 | 0.53411 | -61.9007 | 0.28967 |
| -62.3078 | 0.48723 | -63.9031 | 0.26587 |
| -64.2759 | 0.44679 | -66.0263 | 0.24403 |
| -66.2136 | 0.41204 | -67.899  | 0.22444 |
| -68.3387 | 0.37956 | -70.049  | 0.20619 |
| -70.2232 | 0.34604 | -71.9387 | 0.18907 |
| -72.3732 | 0.31396 | -73.9333 | 0.17174 |
| -74.2366 | 0.28757 | -75.9623 | 0.15577 |
| -76.3833 | 0.25636 | -77.933  | 0.14303 |
| -78.2914 | 0.23825 | -79.9127 | 0.13073 |
| -80.2869 | 0.21614 | -81.9292 | 0.11749 |
| -82.3642 | 0.1923  | -84.012  | 0.10415 |
| -84.3049 | 0.16137 | -85.9716 | 0.09053 |
| -86.3107 | 0.13833 | -87.9724 | 0.07822 |
| -88.3274 | 0.1203  | -89.9779 | 0.06764 |
| -90.32   | 0.10132 | -91.9692 | 0.05521 |
| -92.2721 | 0.09027 | -93.7971 | 0.04629 |
| -93.9066 | 0.07477 | -94.6849 | 0.04317 |
| -94.5655 | 0.06547 | -94.6626 | 0.04434 |
| -94.3301 | 0.06865 | -93.8888 | 0.04914 |
| -93.4871 | 0.07001 | -92.5406 | 0.05531 |
| -92.0949 | 0.08353 | -90.8855 | 0.06454 |
| -90.4134 | 0.09874 | -89.0218 | 0.07486 |
| -88.4867 | 0.10636 | -86.7962 | 0.08669 |
| -86.4029 | 0.12418 | -84.6831 | 0.1003  |
| -84.1335 | 0.14    | -82.4063 | 0.11484 |
| -82.055  | 0.15713 | -80.1336 | 0.12941 |
| -79.7295 | 0.17648 | -77.8927 | 0.14519 |
| -77.5693 | 0.1973  | -75.6924 | 0.16213 |
| -75.3801 | 0.217   | -73.5103 | 0.17854 |
| -73.2396 | 0.23671 | -71.4061 | 0.19583 |



|          |         |          |         |
|----------|---------|----------|---------|
| -71.077  | 0.2616  | -69.1795 | 0.2149  |
| -69.048  | 0.28603 | -67.1989 | 0.23445 |
| -66.8551 | 0.30792 | -65.0039 | 0.25463 |
| -64.7747 | 0.33838 | -63.0664 | 0.27487 |
| -62.7036 | 0.35957 | -60.8879 | 0.29573 |
| -60.6633 | 0.38758 | -58.9191 | 0.31914 |
| -58.5332 | 0.42691 | -56.868  | 0.34527 |
| -56.5149 | 0.45021 | -54.8299 | 0.36751 |
| -54.4889 | 0.46286 | -52.8957 | 0.39527 |
| -52.4639 | 0.4976  | -50.7365 | 0.42701 |
| -50.472  | 0.54261 | -48.7809 | 0.46207 |
| -48.3591 | 0.58569 | -46.783  | 0.49639 |
| -46.3614 | 0.63849 | -44.6204 | 0.53423 |
| -44.416  | 0.68631 | -42.7188 | 0.57587 |
| -42.2685 | 0.74279 | -40.7297 | 0.6219  |
| -40.3623 | 0.79913 | -38.7285 | 0.67081 |
| -38.2255 | 0.86199 | -36.6128 | 0.72637 |
| -36.303  | 0.93522 | -34.614  | 0.78701 |
| -34.1602 | 1.01072 | -32.5911 | 0.85432 |
| -32.2861 | 1.08514 | -30.5995 | 0.92671 |
| -30.1706 | 1.1689  | -28.5371 | 1.00963 |
| -28.2471 | 1.27193 | -26.5745 | 1.10405 |
| -26.0968 | 1.38725 | -24.4401 | 1.20966 |
| -24.2167 | 1.51267 | -22.549  | 1.32301 |
| -22.0793 | 1.64679 | -20.4389 | 1.44846 |
| -20.1059 | 1.8013  | -18.4734 | 1.58761 |
| -18.123  | 1.96713 | -16.4506 | 1.7494  |
| -16.0486 | 2.15641 | -14.4099 | 1.93393 |
| -14.0317 | 2.36814 | -12.4    | 2.12996 |
| -12.0366 | 2.5998  | -10.4026 | 2.34399 |
| -10.1228 | 2.84954 | -8.41647 | 2.57472 |
| -8.07033 | 3.11448 | -6.31966 | 2.81872 |
| -6.05801 | 3.38627 | -4.43024 | 3.0742  |
| -4.01917 | 3.64761 | -2.30076 | 3.34352 |
| -2.00198 | 3.90086 | -0.39207 | 3.61754 |
| 0.0875   | 4.14246 | 1.74755  | 3.92471 |
| 1.96542  | 4.33948 | 3.6616   | 4.2889  |
| 4.10116  | 4.49934 | 5.8192   | 4.52966 |
| 6.00564  | 4.52507 | 7.7433   | 4.58324 |
| 8.11378  | 4.37587 | 9.70793  | 4.40177 |
| 10.08186 | 4.23588 | 11.86526 | 4.05702 |
| 12.07729 | 4.0056  | 13.78915 | 3.70314 |

|          |         |          |         |
|----------|---------|----------|---------|
| 14.20598 | 3.76364 | 15.79592 | 3.33461 |
| 16.09046 | 3.49187 | 17.78252 | 2.97954 |
| 18.20653 | 3.24591 | 19.67748 | 2.65684 |
| 20.07167 | 3.01497 | 21.84366 | 2.36179 |
| 22.17864 | 2.79034 | 23.76246 | 2.09689 |
| 24.13055 | 2.56142 | 25.91781 | 1.85606 |
| 26.13201 | 2.345   | 27.77789 | 1.63756 |
| 28.2408  | 2.13524 | 29.88912 | 1.44097 |
| 30.12402 | 1.95193 | 31.75393 | 1.27046 |
| 32.13938 | 1.78003 | 33.8421  | 1.12656 |
| 34.13679 | 1.61508 | 35.82484 | 1.00379 |
| 36.1406  | 1.47625 | 37.79365 | 0.90002 |
| 38.14814 | 1.35319 | 39.88644 | 0.80955 |
| 40.25239 | 1.23791 | 41.75348 | 0.73227 |
| 42.12934 | 1.15167 | 43.84446 | 0.66346 |
| 44.16281 | 1.06459 | 45.85334 | 0.60235 |
| 46.1781  | 0.98324 | 47.8491  | 0.55048 |
| 48.23901 | 0.91153 | 49.82949 | 0.50309 |
| 50.20927 | 0.8429  | 51.78216 | 0.46065 |
| 52.19196 | 0.78469 | 53.90366 | 0.42235 |
| 54.10378 | 0.72184 | 55.79549 | 0.38705 |
| 56.25667 | 0.66826 | 57.89665 | 0.35583 |
| 58.19183 | 0.61992 | 59.85572 | 0.32689 |
| 60.2915  | 0.57302 | 61.82945 | 0.30145 |
| 62.19602 | 0.52385 | 63.9413  | 0.27555 |
| 64.31325 | 0.48655 | 65.90162 | 0.25219 |
| 66.2985  | 0.44407 | 67.9037  | 0.23056 |
| 68.29892 | 0.40154 | 69.88904 | 0.21201 |
| 70.21051 | 0.36883 | 71.86381 | 0.1936  |
| 72.3279  | 0.33567 | 73.97803 | 0.17616 |
| 74.27223 | 0.30024 | 75.89049 | 0.15981 |
| 76.24898 | 0.27253 | 77.99406 | 0.14395 |
| 78.24111 | 0.24899 | 79.89444 | 0.1297  |
| 80.26643 | 0.22453 | 81.81311 | 0.11839 |
| 82.27085 | 0.20192 | 83.93712 | 0.10523 |
| 84.27859 | 0.1827  | 85.92041 | 0.09237 |
| 86.16627 | 0.15934 | 87.90942 | 0.0794  |
| 88.3182  | 0.13691 | 89.82372 | 0.06776 |
| 90.17707 | 0.118   | 91.94285 | 0.05525 |
| 92.31336 | 0.09874 | 93.93116 | 0.04365 |
| 94.19225 | 0.07201 | 95.94763 | 0.03264 |
| 96.30219 | 0.05857 |          |         |

Data/Fig. 4c:

| Original            |         | Recycled            |         |
|---------------------|---------|---------------------|---------|
| Magnetic field (mT) | MR (%)  | Magnetic field (mT) | MR (%)  |
| 32.66163            | 0.42815 | 26.07778            | 0.45002 |
| 32.58944            | 0.43085 | 26.02956            | 0.44891 |
| 32.40279            | 0.43039 | 25.97005            | 0.44946 |
| 32.15645            | 0.43379 | 25.90539            | 0.44942 |
| 31.83314            | 0.43676 | 25.78236            | 0.44981 |
| 31.45031            | 0.43877 | 25.52493            | 0.45082 |
| 31.05728            | 0.43617 | 25.15123            | 0.44872 |
| 30.67378            | 0.43825 | 24.60563            | 0.44765 |
| 30.22533            | 0.43519 | 23.9405             | 0.4485  |
| 29.82924            | 0.43419 | 23.26806            | 0.44733 |
| 29.37872            | 0.43322 | 22.54396            | 0.44652 |
| 28.98229            | 0.43421 | 21.76418            | 0.44515 |
| 28.54089            | 0.43399 | 20.71805            | 0.44378 |
| 28.14493            | 0.4325  | 19.84992            | 0.44201 |
| 27.70435            | 0.42492 | 18.9614             | 0.44118 |
| 27.29589            | 0.43106 | 17.7689             | 0.43797 |
| 26.89377            | 0.43616 | 16.78507            | 0.436   |
| 26.47793            | 0.43148 | 15.80786            | 0.43217 |
| 26.08686            | 0.4295  | 14.85062            | 0.42954 |
| 25.65566            | 0.43523 | 13.57692            | 0.4266  |
| 25.27694            | 0.43675 | 12.56129            | 0.42302 |
| 24.86592            | 0.4327  | 11.62343            | 0.41903 |
| 24.47491            | 0.43062 | 10.75764            | 0.41529 |
| 24.05703            | 0.43083 | 9.85154             | 0.41072 |
| 23.65704            | 0.42578 | 9.01133             | 0.40614 |
| 23.26217            | 0.42691 | 8.35262             | 0.40162 |
| 22.85441            | 0.42475 | 7.7406              | 0.39658 |
| 22.44626            | 0.42602 | 7.16046             | 0.39165 |
| 22.05415            | 0.42181 | 6.51299             | 0.38657 |
| 21.63648            | 0.42359 | 6.02459             | 0.38282 |
| 21.26384            | 0.43045 | 5.56258             | 0.37621 |
| 20.836              | 0.42418 | 5.11182             | 0.37024 |
| 20.46576            | 0.42367 | 4.60245             | 0.36585 |
| 20.02794            | 0.42385 | 4.19685             | 0.36097 |
| 19.63455            | 0.42422 | 3.81015             | 0.35605 |
| 19.23306            | 0.42085 | 3.43157             | 0.34987 |
| 18.84077            | 0.42348 | 3.07261             | 0.34559 |
| 18.41949            | 0.42749 | 2.61406             | 0.33753 |
| 18.02939            | 0.42431 | 2.25146             | 0.33251 |
| 17.62468            | 0.42166 | 1.9057              | 0.32379 |

|          |         |          |         |
|----------|---------|----------|---------|
| 17.20977 | 0.41852 | 1.4716   | 0.31631 |
| 16.81733 | 0.42276 | 1.1166   | 0.30957 |
| 16.41568 | 0.41699 | 0.76325  | 0.29844 |
| 16.03422 | 0.41655 | 0.39531  | 0.2835  |
| 15.59593 | 0.41675 | -0.04093 | 0.26701 |
| 15.22173 | 0.41765 | -0.38743 | 0.25214 |
| 14.79422 | 0.41159 | -0.74242 | 0.23464 |
| 14.38701 | 0.41638 | -1.10435 | 0.21458 |
| 14.00132 | 0.4258  | -1.55588 | 0.18962 |
| 13.59062 | 0.41953 | -1.91711 | 0.16381 |
| 13.19698 | 0.41838 | -2.29465 | 0.13526 |
| 12.81804 | 0.42004 | -2.68095 | 0.09547 |
| 12.39268 | 0.41504 | -3.1505  | 0.05521 |
| 12.01206 | 0.41297 | -3.52009 | 0.02954 |
| 11.60006 | 0.40764 | -3.88857 | 0.00924 |
| 11.18743 | 0.40612 | -4.30938 | 0.00125 |
| 10.78557 | 0.41225 | -4.7069  | 0.03649 |
| 10.40105 | 0.40971 | -5.07405 | 0.06685 |
| 9.96799  | 0.40835 | -5.55119 | 0.11825 |
| 9.59137  | 0.40205 | -5.92592 | 0.14493 |
| 9.16536  | 0.40333 | -6.29751 | 0.18766 |
| 8.78959  | 0.40509 | -6.67881 | 0.21496 |
| 8.38089  | 0.40528 | -7.15993 | 0.23017 |
| 7.98785  | 0.40212 | -7.53657 | 0.25038 |
| 7.56772  | 0.39824 | -7.93352 | 0.27386 |
| 7.18435  | 0.39451 | -8.30693 | 0.28238 |
| 6.77419  | 0.3992  | -8.72408 | 0.2923  |
| 6.37566  | 0.39289 | -9.14907 | 0.31106 |
| 5.95652  | 0.38985 | -9.51995 | 0.32014 |
| 5.55967  | 0.38886 | -9.9076  | 0.33387 |
| 5.14936  | 0.38836 | -10.385  | 0.34365 |
| 4.76439  | 0.38448 | -10.7649 | 0.34925 |
| 4.36634  | 0.38021 | -11.2502 | 0.35717 |
| 3.94177  | 0.37685 | -11.9726 | 0.36765 |
| 3.56598  | 0.36974 | -12.628  | 0.37529 |
| 3.14141  | 0.36717 | -13.3413 | 0.38179 |
| 2.76097  | 0.36381 | -14.099  | 0.39245 |
| 2.34058  | 0.36183 | -15.0968 | 0.3981  |
| 1.96057  | 0.35353 | -15.9525 | 0.40391 |
| 1.54255  | 0.34493 | -16.8243 | 0.40884 |
| 1.14844  | 0.34478 | -17.9049 | 0.42667 |
| 0.74151  | 0.33236 | -18.8183 | 0.43028 |

|          |          |          |         |
|----------|----------|----------|---------|
| 0.32372  | 0.31605  | -19.7877 | 0.44169 |
| -0.05105 | 0.30609  | -20.7727 | 0.44414 |
| -0.47224 | 0.29221  | -21.9948 | 0.44682 |
| -0.85279 | 0.2658   | -22.9611 | 0.44989 |
| -1.25545 | 0.24454  | -23.9322 | 0.45319 |
| -1.65373 | 0.20769  | -24.8911 | 0.45455 |
| -2.06421 | 0.16451  | -26.1507 | 0.45671 |
| -2.46485 | 0.10737  | -27.1418 | 0.45763 |
| -2.86919 | 0.05232  | -28.1196 | 0.45919 |
| -3.26009 | 1.55E-11 | -29.0984 | 0.46014 |
| -3.67246 | 0.05717  | -30.3164 | 0.46134 |
| -4.07699 | 0.07374  | -31.2637 | 0.46279 |
| -4.47969 | 0.11672  | -32.1123 | 0.46275 |
| -4.87738 | 0.13592  | -32.6771 | 0.46287 |
| -5.28168 | 0.17217  | -33.0557 | 0.4633  |
| -5.68533 | 0.19696  | -33.1055 | 0.46301 |
| -6.10379 | 0.21473  | -32.9705 | 0.46278 |
| -6.47711 | 0.22627  | -32.6047 | 0.46243 |
| -6.88456 | 0.25432  | -32.131  | 0.46299 |
| -7.27976 | 0.25844  | -31.5122 | 0.46284 |
| -7.68368 | 0.26651  | -30.8281 | 0.46265 |
| -8.09071 | 0.28282  | -29.8229 | 0.46169 |
| -8.5071  | 0.29439  | -28.9533 | 0.46086 |
| -8.88974 | 0.31237  | -28.0504 | 0.46096 |
| -9.29681 | 0.33147  | -27.0791 | 0.45986 |
| -9.69271 | 0.33073  | -26.0898 | 0.4599  |
| -10.0924 | 0.33685  | -24.8405 | 0.45894 |
| -10.5194 | 0.35013  | -23.8123 | 0.45711 |
| -10.8818 | 0.35825  | -22.7869 | 0.45521 |
| -11.3184 | 0.3619   | -21.5718 | 0.45464 |
| -11.692  | 0.36548  | -20.4034 | 0.45253 |
| -12.0735 | 0.36668  | -19.3427 | 0.45082 |
| -12.5037 | 0.37142  | -18.0486 | 0.44775 |
| -12.8898 | 0.37094  | -17.0369 | 0.44525 |
| -13.2928 | 0.37528  | -15.9993 | 0.44219 |
| -13.7231 | 0.39962  | -14.9887 | 0.43936 |
| -14.0972 | 0.40369  | -13.8495 | 0.43508 |
| -14.5203 | 0.40075  | -13.0482 | 0.43222 |
| -14.9128 | 0.40211  | -12.3186 | 0.42812 |
| -15.3124 | 0.40775  | -11.4625 | 0.42574 |
| -15.7256 | 0.40503  | -10.8731 | 0.42075 |
| -16.0952 | 0.40503  | -10.3036 | 0.41824 |

|          |         |          |         |
|----------|---------|----------|---------|
| -16.5182 | 0.40696 | -9.64692 | 0.41517 |
| -16.9036 | 0.40854 | -9.18299 | 0.41278 |
| -17.3257 | 0.4117  | -8.71337 | 0.40857 |
| -17.715  | 0.41007 | -8.27983 | 0.40544 |
| -18.1344 | 0.41908 | -7.8141  | 0.40336 |
| -18.5081 | 0.41679 | -7.40057 | 0.39969 |
| -18.9223 | 0.41892 | -6.96254 | 0.39603 |
| -19.3361 | 0.41787 | -6.59372 | 0.39293 |
| -19.729  | 0.41726 | -6.2195  | 0.39017 |
| -20.1228 | 0.42102 | -5.86343 | 0.38678 |
| -20.5217 | 0.42139 | -5.50532 | 0.38193 |
| -20.9421 | 0.42453 | -5.06853 | 0.37781 |
| -21.3195 | 0.42234 | -4.72122 | 0.37292 |
| -21.7423 | 0.42385 | -4.37046 | 0.36807 |
| -22.1406 | 0.42542 | -3.94503 | 0.36426 |
| -22.5333 | 0.42354 | -3.59424 | 0.35948 |
| -22.942  | 0.42646 | -3.24021 | 0.35297 |
| -23.3199 | 0.42472 | -2.88257 | 0.34724 |
| -23.7395 | 0.42685 | -2.41664 | 0.34071 |
| -24.1553 | 0.43054 | -2.06675 | 0.3334  |
| -24.5296 | 0.42921 | -1.69577 | 0.32263 |
| -24.9518 | 0.4346  | -1.32115 | 0.31171 |
| -25.3348 | 0.43422 | -0.93337 | 0.29291 |
| -25.7372 | 0.43373 | -0.50945 | 0.27892 |
| -26.1287 | 0.43196 | -0.13016 | 0.2632  |
| -26.5512 | 0.43279 | 0.22174  | 0.24872 |
| -26.9527 | 0.43313 | 0.6921   | 0.23418 |
| -27.354  | 0.42759 | 1.05723  | 0.21309 |
| -27.7458 | 0.43049 | 1.42927  | 0.19974 |
| -28.151  | 0.43829 | 1.85392  | 0.18048 |
| -28.556  | 0.43126 | 2.28969  | 0.14462 |
| -28.949  | 0.42932 | 2.67136  | 0.12148 |
| -29.7374 | 0.43669 | 3.04428  | 0.07335 |
| -30.1616 | 0.43397 | 3.4239   | 0.02835 |
| -30.5419 | 0.43188 | 3.88324  | 0       |
| -30.9649 | 0.42842 | 4.24467  | 0.00486 |
| -31.2426 | 0.43224 | 4.63309  | 0.05941 |
| -31.3467 | 0.43501 | 5.06912  | 0.12234 |
| -31.2401 | 0.44005 | 5.49264  | 0.15707 |
| -31.0384 | 0.43433 | 5.86753  | 0.18401 |
| -30.7201 | 0.43192 | 6.28812  | 0.19779 |
| -30.3582 | 0.43354 | 6.70841  | 0.20605 |

|          |         |          |         |
|----------|---------|----------|---------|
| -29.9301 | 0.42799 | 7.09134  | 0.2222  |
| -29.5118 | 0.42767 | 7.49794  | 0.2749  |
| -29.0848 | 0.43057 | 7.99256  | 0.29963 |
| -28.6249 | 0.42993 | 8.69058  | 0.32577 |
| -28.1815 | 0.42885 | 9.31328  | 0.34209 |
| -27.7484 | 0.42685 | 10.09115 | 0.35686 |
| -27.3338 | 0.4281  | 10.91093 | 0.36766 |
| -26.8747 | 0.43066 | 11.68816 | 0.38265 |
| -26.4578 | 0.42795 | 12.70939 | 0.39217 |
| -26.0355 | 0.4286  | 13.60383 | 0.40068 |
| -25.6243 | 0.42407 | 14.53211 | 0.40823 |
| -25.2115 | 0.42622 | 15.49726 | 0.41964 |
| -24.815  | 0.42077 | 16.67227 | 0.42563 |
| -24.4013 | 0.42791 | 17.62629 | 0.43136 |
| -23.9991 | 0.42235 | 18.60455 | 0.43532 |
| -23.5986 | 0.42345 |          |         |
| -23.1949 | 0.42168 |          |         |
| -22.7891 | 0.42655 |          |         |
| -22.3911 | 0.42617 |          |         |
| -21.9645 | 0.42345 |          |         |
| -21.5952 | 0.42409 |          |         |
| -21.1642 | 0.42338 |          |         |
| -20.7866 | 0.41954 |          |         |
| -20.3797 | 0.41621 |          |         |
| -19.9632 | 0.41725 |          |         |
| -19.5726 | 0.41433 |          |         |
| -19.1889 | 0.42203 |          |         |
| -18.7624 | 0.41569 |          |         |
| -18.3778 | 0.41936 |          |         |
| -17.9504 | 0.41499 |          |         |
| -17.5853 | 0.41098 |          |         |
| -17.1345 | 0.41284 |          |         |
| -16.7566 | 0.41602 |          |         |
| -16.3498 | 0.41345 |          |         |
| -15.9485 | 0.41014 |          |         |
| -15.5298 | 0.41762 |          |         |
| -15.1539 | 0.41231 |          |         |
| -14.7304 | 0.40428 |          |         |
| -14.332  | 0.40832 |          |         |
| -13.9284 | 0.40317 |          |         |
| -13.5261 | 0.4087  |          |         |
| -13.1325 | 0.40184 |          |         |

|          |         |  |  |
|----------|---------|--|--|
| -12.7142 | 0.40079 |  |  |
| -12.3173 | 0.39765 |  |  |
| -11.9208 | 0.40406 |  |  |
| -11.5383 | 0.40304 |  |  |
| -11.1043 | 0.39813 |  |  |
| -10.7251 | 0.39549 |  |  |
| -10.2989 | 0.39437 |  |  |
| -9.92576 | 0.39551 |  |  |
| -9.50954 | 0.39443 |  |  |
| -9.08275 | 0.40071 |  |  |
| -8.70594 | 0.38853 |  |  |
| -8.3394  | 0.38774 |  |  |
| -7.89313 | 0.39006 |  |  |
| -7.52354 | 0.38398 |  |  |
| -7.08786 | 0.38451 |  |  |
| -6.71083 | 0.38068 |  |  |
| -6.28526 | 0.38217 |  |  |
| -5.91914 | 0.37717 |  |  |
| -5.48209 | 0.37138 |  |  |
| -5.08895 | 0.364   |  |  |
| -4.68661 | 0.36363 |  |  |
| -4.28676 | 0.36189 |  |  |
| -3.88822 | 0.36403 |  |  |
| -3.46991 | 0.34962 |  |  |
| -3.09099 | 0.35052 |  |  |
| -2.67054 | 0.33856 |  |  |
| -2.26816 | 0.32843 |  |  |
| -1.87699 | 0.31678 |  |  |
| -1.47201 | 0.30611 |  |  |
| -1.07057 | 0.30087 |  |  |
| -0.66862 | 0.28251 |  |  |
| -0.28185 | 0.2685  |  |  |
| 0.14026  | 0.23892 |  |  |
| 0.53808  | 0.21002 |  |  |
| 0.93879  | 0.18158 |  |  |
| 1.36046  | 0.14327 |  |  |
| 1.73145  | 0.07676 |  |  |
| 2.16702  | 0.01923 |  |  |
| 2.5404   | 0.01967 |  |  |
| 2.96599  | 0.07038 |  |  |
| 3.34274  | 0.10126 |  |  |
| 3.77632  | 0.13074 |  |  |

|          |         |  |  |
|----------|---------|--|--|
| 4.15333  | 0.17079 |  |  |
| 4.55408  | 0.19226 |  |  |
| 4.95552  | 0.21999 |  |  |
| 5.36101  | 0.23512 |  |  |
| 5.75389  | 0.25129 |  |  |
| 6.16034  | 0.27786 |  |  |
| 6.58318  | 0.28723 |  |  |
| 6.96142  | 0.30533 |  |  |
| 7.38673  | 0.32623 |  |  |
| 7.75153  | 0.33013 |  |  |
| 8.167    | 0.34603 |  |  |
| 8.58685  | 0.35004 |  |  |
| 8.95323  | 0.36177 |  |  |
| 9.37944  | 0.35864 |  |  |
| 9.76258  | 0.37259 |  |  |
| 10.18269 | 0.36868 |  |  |
| 10.56024 | 0.36893 |  |  |
| 10.98382 | 0.38292 |  |  |
| 11.38092 | 0.38221 |  |  |
| 11.79502 | 0.38596 |  |  |
| 12.19212 | 0.38665 |  |  |
| 12.56389 | 0.39214 |  |  |
| 12.98134 | 0.39356 |  |  |
| 13.38423 | 0.39584 |  |  |
| 13.78075 | 0.39752 |  |  |
| 14.20342 | 0.40035 |  |  |
| 14.5792  | 0.40092 |  |  |
| 15.006   | 0.39807 |  |  |
| 15.37974 | 0.40551 |  |  |
| 15.80964 | 0.40049 |  |  |
| 16.17552 | 0.40915 |  |  |
| 16.59291 | 0.41242 |  |  |
| 16.99832 | 0.41085 |  |  |
| 17.39659 | 0.41283 |  |  |

|          |         |  |  |
|----------|---------|--|--|
| 17.81316 | 0.41052 |  |  |
| 18.19403 | 0.41086 |  |  |
| 18.60292 | 0.41448 |  |  |
| 18.98718 | 0.41405 |  |  |
| 19.41896 | 0.41401 |  |  |
| 19.8083  | 0.4159  |  |  |
| 20.20475 | 0.41498 |  |  |
| 20.62525 | 0.40776 |  |  |
| 21.01038 | 0.41492 |  |  |
| 21.41938 | 0.42221 |  |  |
| 21.80472 | 0.413   |  |  |
| 22.23396 | 0.42378 |  |  |
| 22.62518 | 0.42208 |  |  |
| 23.0193  | 0.42057 |  |  |
| 23.41184 | 0.41434 |  |  |
| 23.80924 | 0.42489 |  |  |
| 24.21565 | 0.42444 |  |  |
| 24.61663 | 0.42651 |  |  |
| 25.0332  | 0.43165 |  |  |
| 25.42476 | 0.42451 |  |  |
| 25.82803 | 0.4263  |  |  |
| 26.24225 | 0.42586 |  |  |
| 26.61151 | 0.42944 |  |  |
| 27.03835 | 0.4248  |  |  |
| 27.42234 | 0.42915 |  |  |
| 27.8234  | 0.42952 |  |  |
| 28.23326 | 0.42943 |  |  |
| 28.62766 | 0.43008 |  |  |
| 29.0174  | 0.42998 |  |  |
| 29.42892 | 0.42743 |  |  |
| 29.83776 | 0.42688 |  |  |
| 30.23079 | 0.42988 |  |  |
| 30.63623 | 0.43128 |  |  |

Data/Fig. 5c:

| flat                |         | 15mm                |         | 20mm                |         | 30mm                |         |
|---------------------|---------|---------------------|---------|---------------------|---------|---------------------|---------|
| Magnetic field (mT) | MR (%)  | Magnetic field (mT) | MR (%)  | Magnetic field (mT) | MR (%)  | Magnetic field (mT) | MR (%)  |
| 107.0406            | 0       | 107.2078            | 0.01611 | 106.1758            | 0.00365 | 106.4523            | 0       |
| 106.3317            | 0.00212 | 106.8618            | 0.01624 | 105.9094            | 0.00416 | 106.1166            | 0.00155 |
| 105.3299            | 0.00634 | 106.5688            | 0.01676 | 105.5446            | 0.00366 | 105.737             | 0.00307 |
| 103.8242            | 0.01276 | 106.1054            | 0.01738 | 105.0319            | 0.00437 | 105.2788            | 0.0056  |

|          |         |          |         |          |         |          |         |
|----------|---------|----------|---------|----------|---------|----------|---------|
| 102.1558 | 0.01927 | 105.3612 | 0.02004 | 104.272  | 0.00616 | 104.6783 | 0.00806 |
| 100.1052 | 0.02721 | 104.4471 | 0.02334 | 103.109  | 0.00806 | 103.8553 | 0.01112 |
| 98.11107 | 0.03468 | 102.9843 | 0.02774 | 101.9771 | 0.01173 | 103.0631 | 0.01405 |
| 96.01811 | 0.04319 | 101.6666 | 0.0326  | 100.3873 | 0.0157  | 102.2648 | 0.01737 |
| 93.74545 | 0.05199 | 100.2255 | 0.03836 | 98.91707 | 0.02063 | 101.229  | 0.02038 |
| 91.5724  | 0.06183 | 98.33746 | 0.04466 | 97.32957 | 0.02568 | 100.3407 | 0.02346 |
| 89.44805 | 0.07204 | 96.72002 | 0.05079 | 95.6653  | 0.03305 | 99.39268 | 0.02723 |
| 87.21664 | 0.08161 | 95.05211 | 0.05836 | 93.90017 | 0.03944 | 98.19015 | 0.03116 |
| 85.2078  | 0.09236 | 93.00997 | 0.06607 | 91.58704 | 0.04639 | 97.1977  | 0.03507 |
| 82.97878 | 0.10223 | 90.9307  | 0.07428 | 89.68698 | 0.05356 | 96.20374 | 0.03924 |
| 80.9805  | 0.11295 | 89.01477 | 0.08309 | 87.75363 | 0.06082 | 95.21041 | 0.04332 |
| 78.76776 | 0.12429 | 87.03658 | 0.09233 | 85.32066 | 0.06876 | 93.94002 | 0.04792 |
| 76.80995 | 0.13568 | 84.62599 | 0.0989  | 83.33641 | 0.07703 | 92.93647 | 0.05251 |
| 74.65468 | 0.14898 | 82.68887 | 0.10703 | 81.30853 | 0.08536 | 91.91369 | 0.05712 |
| 72.62845 | 0.16143 | 80.69034 | 0.11526 | 79.24316 | 0.09582 | 90.63434 | 0.06167 |
| 70.60751 | 0.17442 | 78.11229 | 0.12667 | 76.72604 | 0.10617 | 89.62155 | 0.06605 |
| 68.63453 | 0.18909 | 76.05074 | 0.13925 | 74.72999 | 0.11827 | 88.59516 | 0.07094 |
| 66.67062 | 0.20432 | 73.97938 | 0.15183 | 72.69436 | 0.12997 | 87.34258 | 0.07563 |
| 64.51854 | 0.22073 | 71.90099 | 0.16446 | 70.16348 | 0.14277 | 86.36119 | 0.08067 |
| 62.61898 | 0.23829 | 69.34551 | 0.17747 | 68.18575 | 0.15565 | 85.34403 | 0.08602 |
| 60.45803 | 0.25629 | 67.34259 | 0.19192 | 66.18954 | 0.16997 | 84.27745 | 0.09094 |
| 58.47822 | 0.27592 | 65.30295 | 0.20676 | 64.15929 | 0.18587 | 83.12486 | 0.09598 |
| 56.4581  | 0.29547 | 63.27532 | 0.22233 | 61.66483 | 0.20228 | 82.08268 | 0.10138 |
| 54.41898 | 0.31876 | 61.31428 | 0.24071 | 59.64768 | 0.2195  | 80.81706 | 0.10682 |
| 52.36998 | 0.34258 | 58.85641 | 0.25911 | 57.66391 | 0.23852 | 79.83972 | 0.11249 |
| 50.27091 | 0.36946 | 56.91253 | 0.27881 | 55.45804 | 0.25945 | 78.82119 | 0.11773 |
| 48.39155 | 0.39625 | 54.9156  | 0.30122 | 53.25604 | 0.28062 | 77.6144  | 0.12352 |
| 46.27637 | 0.42402 | 52.47246 | 0.32545 | 51.26367 | 0.30417 | 76.64168 | 0.1292  |
| 44.39019 | 0.45621 | 50.55084 | 0.35116 | 49.24557 | 0.33005 | 75.7254  | 0.13542 |
| 42.25665 | 0.49172 | 48.60256 | 0.37764 | 46.80665 | 0.35739 | 74.5529  | 0.14142 |
| 40.36857 | 0.53045 | 46.19873 | 0.40654 | 44.91353 | 0.38891 | 73.60136 | 0.14765 |
| 38.22741 | 0.57211 | 44.26773 | 0.43788 | 43.00883 | 0.42106 | 72.64298 | 0.15418 |
| 36.21436 | 0.61935 | 42.32058 | 0.47442 | 41.03153 | 0.45677 | 71.58706 | 0.16046 |
| 34.24182 | 0.67077 | 39.91952 | 0.51416 | 38.77805 | 0.49535 | 70.5553  | 0.1666  |
| 32.16234 | 0.73033 | 38.00636 | 0.5563  | 36.63884 | 0.53715 | 69.613   | 0.17329 |
| 30.17432 | 0.79393 | 36.07126 | 0.6015  | 34.72597 | 0.58438 | 68.66686 | 0.18074 |
| 28.19044 | 0.86424 | 34.15138 | 0.65312 | 32.82945 | 0.63857 | 67.69555 | 0.18814 |
| 26.27375 | 0.94356 | 31.74262 | 0.70786 | 30.52347 | 0.69518 | 66.55084 | 0.19545 |
| 24.12146 | 1.03336 | 29.83115 | 0.77001 | 28.60776 | 0.75984 | 65.6084  | 0.2029  |
| 22.12241 | 1.13475 | 27.91852 | 0.83772 | 26.6781  | 0.83306 | 64.67504 | 0.21039 |
| 20.13563 | 1.25247 | 25.96315 | 0.91599 | 24.74991 | 0.91463 | 63.49688 | 0.21897 |
| 18.12927 | 1.387   | 23.55958 | 1.00681 | 22.3309  | 1.00788 | 62.55407 | 0.22786 |

|          |         |          |         |          |         |          |         |
|----------|---------|----------|---------|----------|---------|----------|---------|
| 16.12216 | 1.54221 | 21.66082 | 1.10952 | 20.40501 | 1.11594 | 61.60382 | 0.23648 |
| 14.21295 | 1.71952 | 19.76695 | 1.23183 | 18.52373 | 1.24108 | 60.44427 | 0.24551 |
| 12.09926 | 1.92008 | 17.82568 | 1.36681 | 16.4038  | 1.38362 | 59.53603 | 0.25483 |
| 10.11827 | 2.1465  | 15.91077 | 1.52298 | 14.28824 | 1.54536 | 58.5833  | 0.26473 |
| 8.15734  | 2.38352 | 13.53957 | 1.703   | 12.40506 | 1.72833 | 57.44975 | 0.27427 |
| 6.1209   | 2.63291 | 11.65946 | 1.90415 | 10.51532 | 1.93272 | 56.51423 | 0.28503 |
| 4.12162  | 2.89026 | 9.77502  | 2.12665 | 8.40117  | 2.14977 | 55.59195 | 0.29572 |
| 2.1312   | 3.16066 | 7.85659  | 2.35399 | 6.25654  | 2.37878 | 54.37464 | 0.30695 |
| 0.05009  | 3.46156 | 5.46977  | 2.60136 | 4.33158  | 2.62074 | 53.44496 | 0.31839 |
| -1.89381 | 3.87162 | 3.55612  | 2.857   | 2.4441   | 2.86817 | 52.51524 | 0.33071 |
| -3.96554 | 4.13671 | 1.66665  | 3.11987 | 0.08029  | 3.13343 | 51.45371 | 0.3433  |
| -5.83524 | 4.22009 | -0.22373 | 3.44104 | -1.83144 | 3.49516 | 50.38726 | 0.35604 |
| -7.94152 | 4.09505 | -2.58527 | 3.79075 | -3.7092  | 3.76437 | 49.42974 | 0.36926 |
| -9.81886 | 3.79563 | -4.47945 | 3.99483 | -5.59107 | 3.89569 | 48.37481 | 0.38307 |
| -11.971  | 3.42034 | -6.39032 | 4.01683 | -7.56234 | 3.83488 | 47.3314  | 0.3978  |
| -13.8989 | 3.04058 | -8.27382 | 3.8427  | -9.96824 | 3.61151 | 46.38748 | 0.41243 |
| -15.9189 | 2.67411 | -10.683  | 3.52614 | -11.7859 | 3.291   | 45.41839 | 0.42781 |
| -17.9415 | 2.34232 | -12.5374 | 3.1689  | -13.8507 | 2.94636 | 44.21899 | 0.4446  |
| -19.9198 | 2.05121 | -14.4536 | 2.80517 | -15.9244 | 2.60322 | 43.26365 | 0.46171 |
| -21.883  | 1.79139 | -16.3657 | 2.4703  | -17.8101 | 2.29626 | 42.3167  | 0.47903 |
| -23.9581 | 1.55972 | -18.5103 | 2.16325 | -19.6804 | 2.01125 | 41.37756 | 0.49828 |
| -25.8478 | 1.35918 | -20.6067 | 1.89438 | -22.0714 | 1.76317 | 40.22861 | 0.51805 |
| -27.9904 | 1.19138 | -22.5285 | 1.6555  | -23.9187 | 1.53867 | 39.29463 | 0.53909 |
| -29.8528 | 1.04808 | -24.4086 | 1.44124 | -25.8068 | 1.34607 | 38.35152 | 0.56061 |
| -31.9811 | 0.92645 | -26.3033 | 1.25712 | -27.7425 | 1.16826 | 37.29367 | 0.58364 |
| -33.9328 | 0.8234  | -28.6248 | 1.09561 | -30.1471 | 1.02171 | 36.21401 | 0.60761 |
| -35.9096 | 0.7374  | -30.4913 | 0.96105 | -32.1026 | 0.89771 | 35.25269 | 0.63308 |
| -38.0092 | 0.66735 | -32.3598 | 0.84584 | -33.9406 | 0.79479 | 34.2965  | 0.65965 |
| -39.9921 | 0.60602 | -34.5166 | 0.75039 | -35.8462 | 0.70707 | 33.22761 | 0.68735 |
| -41.971  | 0.55275 | -36.6018 | 0.67087 | -37.7694 | 0.63024 | 32.14555 | 0.71656 |
| -43.9601 | 0.50559 | -38.4898 | 0.60489 | -40.1875 | 0.56734 | 31.18477 | 0.74759 |
| -45.9292 | 0.46851 | -40.3771 | 0.54778 | -42.0991 | 0.51425 | 30.24413 | 0.7805  |
| -47.9416 | 0.43408 | -42.5378 | 0.4993  | -43.947  | 0.46798 | 29.0815  | 0.8153  |
| -49.9131 | 0.40092 | -44.6241 | 0.45579 | -45.7681 | 0.4266  | 28.15498 | 0.85091 |
| -51.8674 | 0.36936 | -46.4781 | 0.41935 | -48.1264 | 0.39102 | 27.11577 | 0.88901 |
| -53.8519 | 0.34386 | -48.3749 | 0.38477 | -49.9487 | 0.35834 | 26.07536 | 0.93128 |
| -56.0145 | 0.32224 | -50.7006 | 0.35447 | -51.7724 | 0.32836 | 25.12686 | 0.97499 |
| -57.873  | 0.29948 | -52.5497 | 0.32574 | -53.6798 | 0.30175 | 24.16015 | 1.02143 |
| -59.9916 | 0.27869 | -54.4547 | 0.30068 | -56.0827 | 0.27832 | 23.21117 | 1.07139 |
| -61.9521 | 0.26003 | -56.3422 | 0.27693 | -57.9613 | 0.25624 | 22.05027 | 1.12461 |
| -63.9517 | 0.24202 | -58.7359 | 0.25525 | -59.889  | 0.23548 | 21.12158 | 1.18012 |
| -65.9573 | 0.22575 | -60.6071 | 0.23468 | -61.9438 | 0.217   | 20.07824 | 1.2415  |

|          |         |          |         |          |         |          |         |
|----------|---------|----------|---------|----------|---------|----------|---------|
| -67.938  | 0.21023 | -62.4567 | 0.21558 | -64.0617 | 0.19895 | 19.02927 | 1.30572 |
| -70.021  | 0.194   | -64.743  | 0.1975  | -65.9121 | 0.18235 | 18.10002 | 1.37482 |
| -71.9574 | 0.18049 | -66.5976 | 0.18128 | -67.8021 | 0.16749 | 17.04223 | 1.45038 |
| -73.929  | 0.16894 | -68.4919 | 0.16719 | -70.1589 | 0.15147 | 16.02438 | 1.52973 |
| -75.9407 | 0.15682 | -70.4156 | 0.1513  | -72.0104 | 0.13794 | 15.11628 | 1.61487 |
| -77.9549 | 0.14507 | -72.5332 | 0.13771 | -73.8613 | 0.12588 | 13.93795 | 1.71055 |
| -79.8435 | 0.13246 | -74.6183 | 0.12581 | -75.7433 | 0.11331 | 12.91018 | 1.81732 |
| -82.0157 | 0.12134 | -76.4812 | 0.11419 | -78.1661 | 0.10169 | 11.85765 | 1.93395 |
| -83.9714 | 0.11126 | -78.7381 | 0.10331 | -80.0579 | 0.09047 | 10.7917  | 2.06017 |
| -86.0661 | 0.10193 | -80.621  | 0.0936  | -81.9712 | 0.07961 | 9.58688  | 2.19305 |
| -87.9755 | 0.09296 | -82.5146 | 0.08233 | -83.8962 | 0.06844 | 8.38742  | 2.3303  |
| -90.0628 | 0.08616 | -84.4187 | 0.07219 | -86.0532 | 0.0583  | 7.33901  | 2.46032 |
| -91.9085 | 0.07815 | -86.4447 | 0.06211 | -88.1653 | 0.04987 | 6.31679  | 2.59918 |
| -93.7165 | 0.06999 | -88.6163 | 0.05269 | -90.0154 | 0.04136 | 5.33392  | 2.7338  |
| -94.4466 | 0.06665 | -90.4308 | 0.04538 | -91.6527 | 0.03454 | 4.10655  | 2.86977 |
| -94.3734 | 0.0654  | -91.7307 | 0.04045 | -93.1183 | 0.03056 | 3.1207   | 3.00766 |
| -93.5531 | 0.06985 | -92.649  | 0.03728 | -93.7664 | 0.028   | 2.16348  | 3.14479 |
| -92.2659 | 0.07464 | -93.0269 | 0.03651 | -94.013  | 0.02775 | 1.11237  | 3.28263 |
| -90.6334 | 0.08284 | -92.9451 | 0.03712 | -93.8383 | 0.02986 | 0.09669  | 3.426   |
| -88.7364 | 0.09104 | -92.5182 | 0.03845 | -93.2987 | 0.03316 | -0.80486 | 3.58495 |
| -86.71   | 0.0988  | -91.6786 | 0.04253 | -92.5238 | 0.03539 | -1.68409 | 3.79009 |
| -84.5641 | 0.10982 | -90.6774 | 0.04683 | -91.5006 | 0.03982 | -2.66972 | 3.98376 |
| -82.3733 | 0.12058 | -89.5011 | 0.05306 | -90.053  | 0.04403 | -3.61557 | 4.11785 |
| -80.054  | 0.13064 | -87.775  | 0.05886 | -88.4431 | 0.05036 | -4.41266 | 4.22975 |
| -78.0072 | 0.14141 | -86.2127 | 0.06508 | -86.9016 | 0.05707 | -5.47303 | 4.29857 |
| -75.7007 | 0.15422 | -84.5791 | 0.07386 | -85.1246 | 0.0644  | -6.30651 | 4.31847 |
| -73.6145 | 0.16555 | -82.7666 | 0.08263 | -83.2886 | 0.07353 | -7.15767 | 4.29763 |
| -71.36   | 0.17751 | -80.3569 | 0.09157 | -81.3013 | 0.08336 | -8.11981 | 4.23089 |
| -69.3374 | 0.19166 | -78.3933 | 0.10198 | -79.0436 | 0.09371 | -9.10148 | 4.12284 |
| -67.1884 | 0.20685 | -76.3171 | 0.11278 | -76.9712 | 0.10418 | -9.94062 | 3.98202 |
| -65.1258 | 0.22134 | -74.3127 | 0.12353 | -74.5171 | 0.11671 | -10.9195 | 3.81668 |
| -62.9561 | 0.23823 | -71.7466 | 0.13644 | -72.4253 | 0.13013 | -11.8885 | 3.63929 |
| -61.0319 | 0.25455 | -69.6503 | 0.14953 | -70.3123 | 0.14392 | -12.7686 | 3.44834 |
| -58.8472 | 0.27198 | -67.5064 | 0.16425 | -67.8955 | 0.15843 | -13.6814 | 3.25813 |
| -56.9365 | 0.2902  | -65.3412 | 0.1795  | -65.5528 | 0.17536 | -14.5853 | 3.06954 |
| -54.7795 | 0.31154 | -63.2058 | 0.19547 | -63.3784 | 0.19192 | -15.7608 | 2.8836  |
| -52.8391 | 0.33404 | -61.0177 | 0.21367 | -61.2513 | 0.21061 | -16.6818 | 2.70404 |
| -50.7092 | 0.35792 | -58.5371 | 0.2329  | -58.9563 | 0.22955 | -17.6045 | 2.53904 |
| -48.7113 | 0.38214 | -56.1613 | 0.25328 | -56.6487 | 0.25013 | -18.6456 | 2.3754  |
| -46.6945 | 0.40974 | -54.0546 | 0.27357 | -54.5928 | 0.2733  | -19.6816 | 2.22019 |
| -44.7039 | 0.43972 | -51.9523 | 0.30197 | -52.5608 | 0.29715 | -20.6204 | 2.07472 |
| -42.7313 | 0.4736  | -49.8981 | 0.32854 | -49.9898 | 0.32323 | -21.5851 | 1.94127 |



|          |         |          |         |          |         |          |         |
|----------|---------|----------|---------|----------|---------|----------|---------|
| -40.5522 | 0.51118 | -47.3776 | 0.35698 | -47.9917 | 0.3522  | -22.6296 | 1.81502 |
| -38.6585 | 0.54952 | -45.3725 | 0.38761 | -45.9863 | 0.38262 | -23.6643 | 1.69452 |
| -36.5434 | 0.5932  | -43.3616 | 0.42233 | -43.6573 | 0.41681 | -24.583  | 1.57965 |
| -34.6314 | 0.64172 | -41.2513 | 0.4606  | -41.3342 | 0.45317 | -25.7176 | 1.47466 |
| -32.5127 | 0.69443 | -38.7471 | 0.49967 | -39.3351 | 0.495   | -26.6373 | 1.37536 |
| -30.5941 | 0.75417 | -36.7527 | 0.54472 | -37.3022 | 0.53828 | -27.5774 | 1.28691 |
| -28.4822 | 0.82013 | -34.7569 | 0.59469 | -35.3644 | 0.58791 | -28.5458 | 1.20366 |
| -26.609  | 0.89435 | -32.5394 | 0.65043 | -32.9635 | 0.64215 | -29.6174 | 1.12509 |
| -24.4359 | 0.97863 | -30.3528 | 0.71092 | -30.9782 | 0.70278 | -30.6831 | 1.05326 |
| -22.4311 | 1.07321 | -28.4035 | 0.77975 | -28.9638 | 0.76976 | -31.619  | 0.98893 |
| -20.4502 | 1.18394 | -26.459  | 0.8565  | -27.0308 | 0.84463 | -32.564  | 0.92932 |
| -18.4207 | 1.30751 | -24.4736 | 0.94312 | -24.5853 | 0.92884 | -33.7337 | 0.87426 |
| -16.3998 | 1.45154 | -22.0391 | 1.04309 | -22.6472 | 1.02323 | -34.6721 | 0.82414 |
| -14.2907 | 1.61718 | -20.1088 | 1.15618 | -20.6854 | 1.13443 | -35.6257 | 0.77816 |
| -12.324  | 1.80366 | -18.2081 | 1.28533 | -18.7221 | 1.25976 | -36.5659 | 0.73543 |
| -10.436  | 2.01394 | -16.2946 | 1.43438 | -16.8049 | 1.40356 | -37.7594 | 0.69578 |
| -8.31532 | 2.24563 | -13.8964 | 1.60625 | -14.4397 | 1.56941 | -38.6958 | 0.65857 |
| -6.33456 | 2.48955 | -12.0081 | 1.80528 | -12.5868 | 1.75422 | -39.6116 | 0.62671 |
| -4.30254 | 2.74167 | -10.1596 | 2.01951 | -10.6634 | 1.96921 | -40.7882 | 0.5951  |
| -2.29497 | 3.00636 | -7.83527 | 2.25003 | -8.31211 | 2.19051 | -41.7486 | 0.56683 |
| -0.31454 | 3.28147 | -5.99194 | 2.4902  | -6.50101 | 2.42363 | -42.6723 | 0.53988 |
| 1.68379  | 3.62346 | -4.10325 | 2.74325 | -4.21802 | 2.66296 | -43.7037 | 0.51545 |
| 3.68128  | 3.98559 | -1.70881 | 3.00486 | -2.3408  | 2.91243 | -44.748  | 0.49188 |
| 5.83524  | 4.15971 | 0.17309  | 3.3051  | -0.46698 | 3.19444 | -45.6767 | 0.47078 |
| 7.73652  | 4.12551 | 2.0925   | 3.66751 | 1.90987  | 3.53037 | -46.601  | 0.45131 |
| 9.74471  | 3.91254 | 3.99088  | 3.88364 | 3.74456  | 3.7183  | -47.7758 | 0.43116 |
| 11.73125 | 3.57465 | 6.39032  | 3.91018 | 5.59107  | 3.74737 | -48.6917 | 0.4123  |
| 13.78643 | 3.19571 | 8.37645  | 3.77301 | 7.74059  | 3.61647 | -49.8217 | 0.39545 |
| 15.84121 | 2.82129 | 10.36854 | 3.49343 | 9.83731  | 3.37331 | -50.7549 | 0.37851 |
| 17.83183 | 2.47761 | 12.31553 | 3.1411  | 11.7381  | 3.05475 | -51.7738 | 0.36363 |
| 19.8296  | 2.17178 | 14.20783 | 2.78302 | 13.63717 | 2.72504 | -52.7958 | 0.34993 |
| 21.75817 | 1.8976  | 16.52174 | 2.44442 | 15.98981 | 2.40785 | -53.7413 | 0.33662 |
| 23.89761 | 1.65545 | 18.41735 | 2.13796 | 17.84054 | 2.11981 | -54.6887 | 0.32214 |
| 25.91295 | 1.44501 | 20.30378 | 1.86957 | 19.712   | 1.86077 | -55.843  | 0.30926 |
| 27.88086 | 1.26105 | 22.44846 | 1.62865 | 22.06727 | 1.62625 | -56.7602 | 0.29684 |
| 29.8068  | 1.10629 | 24.54855 | 1.41361 | 23.95981 | 1.41824 | -57.6881 | 0.28543 |
| 31.94116 | 0.97871 | 26.42291 | 1.22738 | 25.85624 | 1.23576 | -58.8565 | 0.2742  |
| 33.92294 | 0.86686 | 28.30423 | 1.06333 | 27.98952 | 1.0749  | -59.8054 | 0.26296 |
| 35.93387 | 0.77169 | 30.62434 | 0.92725 | 30.08348 | 0.9432  | -60.7614 | 0.25189 |
| 37.84266 | 0.69351 | 32.51527 | 0.81052 | 31.96822 | 0.82915 | -61.6738 | 0.24182 |
| 39.97883 | 0.62828 | 34.41525 | 0.71441 | 33.87166 | 0.72759 | -62.8589 | 0.23257 |
| 41.85391 | 0.57313 | 36.32372 | 0.63455 | 36.20654 | 0.64636 | -63.7854 | 0.2221  |











|  |  |  |  |  |  |          |         |
|--|--|--|--|--|--|----------|---------|
|  |  |  |  |  |  | 82.88124 | 0.09447 |
|  |  |  |  |  |  | 83.79923 | 0.08944 |
|  |  |  |  |  |  | 84.9619  | 0.08429 |
|  |  |  |  |  |  | 85.86759 | 0.07924 |
|  |  |  |  |  |  | 86.7876  | 0.07453 |
|  |  |  |  |  |  | 87.96266 | 0.06952 |
|  |  |  |  |  |  | 88.90478 | 0.06481 |
|  |  |  |  |  |  | 89.84692 | 0.06115 |
|  |  |  |  |  |  | 90.88601 | 0.0563  |
|  |  |  |  |  |  | 92.00379 | 0.05216 |
|  |  |  |  |  |  | 92.92617 | 0.04784 |
|  |  |  |  |  |  | 93.84404 | 0.04385 |
|  |  |  |  |  |  | 94.80118 | 0.03946 |
|  |  |  |  |  |  | 96.00763 | 0.03587 |
|  |  |  |  |  |  | 96.91053 | 0.03164 |

Data/Fig. 5d:

| Radius (mm) | MR (%) |
|-------------|--------|
| 35          | 4.22   |
| 30          | 4.32   |
| 20          | 3.9    |
| 15          | 4.02   |

Data/Fig. 5e:

| Degree (°) | Resistance (Ω) |
|------------|----------------|
| 0          | 44.60143       |
| 7.57952    | 44.6855        |
| 11.45916   | 44.79382       |
| 14.88588   | 44.92724       |
| 18.11852   | 45.05025       |
| 21.24584   | 45.19491       |
| 24.30854   | 45.35537       |
| 27.32835   | 45.51261       |
| 30.31808   | 45.67821       |
| 33.28584   | 45.78785       |
| 36.23703   | 45.9036        |

Data/Fig. 5f:

| Time (s) | MR (%)  |
|----------|---------|
| 0        | 0.05031 |
| 0.20047  | 0.0493  |
| 0.40193  | 0.05208 |

|         |         |
|---------|---------|
| 0.6014  | 0.05275 |
| 0.80186 | 0.05079 |
| 1.00233 | 0.05228 |
| 1.20279 | 0.05164 |

|         |         |
|---------|---------|
| 1.40226 | 0.05061 |
| 1.60273 | 0.04908 |
| 1.80219 | 0.05135 |
| 2.00365 | 0.04903 |

|         |         |
|---------|---------|
| 2.20518 | 0.05098 |
| 2.40558 | 0.04977 |
| 2.6061  | 0.04904 |
| 2.80663 | 0.04709 |

|         |         |
|---------|---------|
| 3.00698 | 0.0454  |
| 3.20644 | 0.04683 |
| 3.40691 | 0.04719 |
| 3.60637 | 0.05305 |

|          |         |
|----------|---------|
| 3.80684  | 0.04294 |
| 4.00631  | 0.04891 |
| 4.20777  | 0.04566 |
| 4.40823  | 0.0468  |
| 4.60876  | 0.04641 |
| 4.80919  | 0.04977 |
| 5.00863  | 0.04575 |
| 5.21009  | 0.04867 |
| 5.41056  | 0.04337 |
| 5.61202  | 0.04878 |
| 5.81154  | 0.04638 |
| 6.01295  | 0.04461 |
| 6.21242  | 0.04583 |
| 6.41388  | 0.0493  |
| 6.61336  | 0.04637 |
| 6.81384  | 0.04662 |
| 7.01428  | 0.04624 |
| 7.21575  | 0.04687 |
| 7.4162   | 0.04869 |
| 7.61668  | 0.04548 |
| 7.81713  | 0.04801 |
| 8.0166   | 0.04445 |
| 8.21806  | 0.04869 |
| 8.41753  | 0.0478  |
| 8.618    | 0.0443  |
| 8.81846  | 0.04389 |
| 9.01998  | 0.0442  |
| 9.22041  | 0.04122 |
| 9.42088  | 0.04236 |
| 9.62131  | 0.04127 |
| 9.82277  | 0.04022 |
| 10.02224 | 0.04709 |
| 10.22271 | 0.04504 |
| 10.42318 | 0.04574 |
| 10.62267 | 0.0415  |
| 10.82312 | 0.04441 |
| 11.02257 | 0.04177 |
| 11.22304 | 0.04748 |
| 11.42257 | 0.04437 |
| 11.62297 | 0.04427 |
| 11.82343 | 0.04666 |
| 12.0249  | 0.04558 |

|          |         |
|----------|---------|
| 12.22439 | 0.04737 |
| 12.42489 | 0.04757 |
| 12.62429 | 0.04987 |
| 12.82478 | 0.0474  |
| 13.02429 | 0.04883 |
| 13.22575 | 0.04555 |
| 13.42622 | 0.04825 |
| 13.62563 | 0.04896 |
| 13.82708 | 0.04689 |
| 14.02755 | 0.04609 |
| 14.22805 | 0.047   |
| 14.42751 | 0.05006 |
| 14.62894 | 0.04918 |
| 14.82941 | 0.04993 |
| 15.02987 | 0.04519 |
| 15.22934 | 0.04574 |
| 15.43087 | 0.04653 |
| 15.63127 | 0.05073 |
| 15.83276 | 0.04833 |
| 16.03419 | 0.05002 |
| 16.23366 | 0.04765 |
| 16.43515 | 0.05175 |
| 16.63559 | 0.04832 |
| 16.83605 | 0.04665 |
| 17.03651 | 0.04887 |
| 17.23798 | 0.04487 |
| 17.43844 | 0.04891 |
| 17.6399  | 0.04823 |
| 17.84037 | 0.0476  |
| 18.04085 | 0.0486  |
| 18.2413  | 0.05104 |
| 18.44177 | 0.04727 |
| 18.64229 | 0.04975 |
| 18.84275 | 0.04657 |
| 19.04416 | 0.04555 |
| 19.24469 | 0.04712 |
| 19.44508 | 0.04789 |
| 19.64557 | 0.04898 |
| 19.84601 | 0.05008 |
| 20.04649 | 0.04908 |
| 20.24794 | 0.05119 |
| 20.44843 | 0.04904 |

|          |         |
|----------|---------|
| 20.64987 | 0.05222 |
| 20.84933 | 0.04899 |
| 21.05082 | 0.05019 |
| 21.25026 | 0.05013 |
| 21.45073 | 0.04748 |
| 21.65026 | 0.04905 |
| 21.85066 | 0.04902 |
| 22.05112 | 0.0477  |
| 22.25159 | 0.04942 |
| 22.45205 | 0.04761 |
| 22.65252 | 0.0478  |
| 22.85398 | 0.04755 |
| 23.05444 | 0.04764 |
| 23.25591 | 0.04842 |
| 23.45538 | 0.04585 |
| 23.65684 | 0.04882 |
| 23.8573  | 0.04971 |
| 24.05877 | 0.05008 |
| 24.25929 | 0.04947 |
| 24.45972 | 0.04926 |
| 24.66016 | 0.04679 |
| 24.85963 | 0.04805 |
| 25.06109 | 0.04654 |
| 25.26055 | 0.04894 |
| 25.46202 | 0.04704 |
| 25.66148 | 0.05014 |
| 25.86195 | 0.05044 |
| 26.06241 | 0.04419 |
| 26.26288 | 0.04387 |
| 26.46334 | 0.0444  |
| 26.66381 | 0.04753 |
| 26.86427 | 0.04381 |
| 27.06374 | 0.04485 |
| 27.2652  | 0.0469  |
| 27.46567 | 0.0447  |
| 27.66713 | 0.04658 |
| 27.86659 | 0.0468  |
| 28.06806 | 0.044   |
| 28.26852 | 0.04878 |
| 28.46899 | 0.04283 |
| 28.66852 | 0.04416 |
| 28.86992 | 0.0437  |

|          |         |
|----------|---------|
| 29.07038 | 0.04618 |
| 29.27185 | 0.04545 |
| 29.47231 | 0.04606 |
| 29.67277 | 0.0436  |
| 29.87423 | 0.04737 |
| 30.07372 | 0.04409 |
| 30.27417 | 0.04537 |
| 30.47463 | 0.0435  |
| 30.67609 | 0.04276 |
| 30.87556 | 0.04717 |
| 31.07602 | 0.0439  |
| 31.27649 | 0.04824 |
| 31.47696 | 0.04379 |
| 31.67642 | 0.04077 |
| 31.87788 | 0.0417  |
| 32.07835 | 0.04092 |
| 32.27882 | 0.04074 |
| 32.48028 | 0.04177 |
| 32.68074 | 0.03977 |
| 32.88121 | 0.04176 |
| 33.08167 | 0.04201 |
| 33.28213 | 0.04018 |
| 33.4816  | 0.03914 |
| 33.68207 | 0.04315 |
| 33.88253 | 0.04394 |
| 34.083   | 0.03745 |
| 34.28346 | 0.04164 |
| 34.48493 | 0.04138 |
| 34.68539 | 0.03823 |
| 34.88685 | 0.04116 |
| 35.08632 | 0.04275 |
| 35.28778 | 0.04148 |
| 35.48924 | 0.03932 |
| 35.68971 | 0.03716 |
| 35.89117 | 0.04502 |
| 36.09163 | 0.04199 |
| 36.2921  | 0.03854 |
| 36.49156 | 0.03907 |
| 36.69303 | 0.03955 |
| 36.89353 | 0.03813 |
| 37.09396 | 0.03773 |
| 37.29348 | 0.043   |

|          |         |
|----------|---------|
| 37.49489 | 0.03973 |
| 37.69535 | 0.04181 |
| 37.89581 | 0.03758 |
| 38.09728 | 0.04002 |
| 38.29689 | 0.03857 |
| 38.49823 | 0.03964 |
| 38.69867 | 0.0393  |
| 38.89914 | 0.03798 |
| 39.09965 | 0.0417  |
| 39.30009 | 0.04021 |
| 39.50056 | 0.03964 |
| 39.70199 | 0.04014 |
| 39.90146 | 0.03789 |
| 40.10192 | 0.03511 |
| 40.30239 | 0.03735 |
| 40.50285 | 0.03604 |
| 40.70233 | 0.0401  |
| 40.90279 | 0.03834 |
| 41.10325 | 0.04125 |
| 41.30372 | 0.03819 |
| 41.50418 | 0.04138 |
| 41.70465 | 0.03654 |
| 41.90611 | 0.04026 |
| 42.10557 | 0.04131 |
| 42.30609 | 0.04063 |
| 42.50551 | 0.04134 |
| 42.70597 | 0.03871 |
| 42.90644 | 0.03991 |
| 43.10691 | 0.04082 |
| 43.30737 | 0.04269 |
| 43.50789 | 0.04371 |
| 43.7083  | 0.03742 |
| 43.90876 | 0.03951 |
| 44.10922 | 0.04535 |
| 44.30969 | 0.04208 |
| 44.51121 | 0.0422  |
| 44.71062 | 0.04636 |
| 44.91108 | 0.04651 |
| 45.11155 | 0.04635 |
| 45.31301 | 0.04645 |
| 45.51248 | 0.04782 |
| 45.71301 | 0.05012 |



|          |         |
|----------|---------|
| 45.91245 | 0.04969 |
| 46.11287 | 0.05958 |
| 46.31334 | 0.0576  |
| 46.5138  | 0.0771  |
| 46.71527 | 0.32043 |
| 46.91473 | 0.69789 |
| 47.1152  | 0.97894 |
| 47.31467 | 1.18835 |
| 47.51613 | 1.21266 |
| 47.71659 | 1.22032 |
| 47.91706 | 1.22714 |
| 48.11655 | 1.22225 |
| 48.31699 | 1.22962 |
| 48.51646 | 1.23082 |
| 48.71792 | 1.23065 |
| 48.91741 | 1.22838 |
| 49.11785 | 1.23142 |
| 49.31931 | 1.23414 |
| 49.51981 | 1.23155 |
| 49.72124 | 1.23054 |
| 49.92178 | 1.23041 |
| 50.12319 | 1.2375  |
| 50.32366 | 1.23344 |
| 50.52509 | 1.23566 |
| 50.72456 | 1.23416 |
| 50.92502 | 1.23235 |
| 51.12449 | 1.24039 |
| 51.32595 | 1.23292 |
| 51.5265  | 1.23649 |
| 51.72794 | 1.23477 |
| 51.92738 | 1.23499 |
| 52.12782 | 1.23499 |
| 52.32939 | 1.23989 |
| 52.52974 | 1.23677 |
| 52.7312  | 1.24217 |
| 52.93167 | 1.23938 |
| 53.1332  | 1.23968 |
| 53.33261 | 1.23953 |
| 53.53309 | 1.24269 |
| 53.73353 | 1.23913 |
| 53.93403 | 1.24385 |
| 54.13447 | 1.23913 |

|          |         |
|----------|---------|
| 54.33598 | 1.23796 |
| 54.53538 | 1.2371  |
| 54.73685 | 1.24191 |
| 54.93731 | 1.23816 |
| 55.1368  | 1.24246 |
| 55.33824 | 1.24264 |
| 55.53871 | 1.24305 |
| 55.73917 | 1.23797 |
| 55.93864 | 1.44864 |
| 56.1401  | 1.82567 |
| 56.33957 | 2.08526 |
| 56.54103 | 2.3752  |
| 56.7415  | 2.71317 |
| 56.94196 | 2.9104  |
| 57.14143 | 2.96715 |
| 57.34289 | 2.98313 |
| 57.54338 | 3.01473 |
| 57.74282 | 3.02291 |
| 57.94329 | 3.04719 |
| 58.14375 | 3.0644  |
| 58.34421 | 3.07713 |
| 58.54468 | 3.08426 |
| 58.74616 | 3.08311 |
| 58.94568 | 3.09002 |
| 59.14707 | 3.08931 |
| 59.34657 | 3.09006 |
| 59.548   | 3.09619 |
| 59.74747 | 3.10017 |
| 59.94893 | 3.10094 |
| 60.14939 | 3.10404 |
| 60.34986 | 3.10914 |
| 60.55033 | 3.10713 |
| 60.75079 | 3.10773 |
| 60.95131 | 3.10996 |
| 61.15072 | 3.11117 |
| 61.35125 | 3.10996 |
| 61.55068 | 3.11448 |
| 61.75212 | 3.11324 |
| 61.95158 | 3.11694 |
| 62.15304 | 3.11182 |
| 62.35255 | 3.11429 |
| 62.553   | 3.1159  |

|          |         |
|----------|---------|
| 62.75244 | 3.1183  |
| 62.95291 | 3.11773 |
| 63.15343 | 3.11675 |
| 63.35484 | 3.12098 |
| 63.5563  | 3.12251 |
| 63.75676 | 3.11772 |
| 63.95723 | 3.11909 |
| 64.15669 | 3.11762 |
| 64.35816 | 3.12155 |
| 64.55762 | 3.12285 |
| 64.75815 | 3.12446 |
| 64.95761 | 3.12718 |
| 65.15902 | 3.12748 |
| 65.35951 | 3.12853 |
| 65.55995 | 3.12454 |
| 65.76141 | 3.12659 |
| 65.96187 | 3.12963 |
| 66.16234 | 3.12826 |
| 66.3628  | 3.12878 |
| 66.56327 | 3.1299  |
| 66.76374 | 3.13331 |
| 66.9642  | 3.13076 |
| 67.16466 | 3.08782 |
| 67.36513 | 3.01649 |
| 67.56459 | 2.97428 |
| 67.76606 | 2.96945 |
| 67.96652 | 2.97168 |
| 68.16798 | 2.97028 |
| 68.36745 | 2.97068 |
| 68.56793 | 2.97295 |
| 68.76938 | 2.96646 |
| 68.96887 | 2.96701 |
| 69.17031 | 2.96717 |
| 69.36984 | 2.96968 |
| 69.57024 | 2.96639 |
| 69.76971 | 2.96865 |
| 69.97117 | 2.9647  |
| 70.17163 | 2.96864 |
| 70.3721  | 2.96927 |
| 70.57256 | 2.97057 |
| 70.77403 | 2.97007 |
| 70.97349 | 2.96774 |

|          |         |
|----------|---------|
| 71.17396 | 2.96848 |
| 71.37449 | 2.96603 |
| 71.57601 | 2.96488 |
| 71.77638 | 2.96582 |
| 71.97681 | 2.9694  |
| 72.17728 | 2.96706 |
| 72.37675 | 2.96564 |
| 72.57821 | 2.96503 |
| 72.77767 | 2.96237 |
| 72.97916 | 2.96414 |
| 73.1796  | 2.96327 |
| 73.38007 | 2.96201 |
| 73.57959 | 2.96    |
| 73.78003 | 2.96    |
| 73.98046 | 2.96213 |
| 74.18093 | 2.96291 |
| 74.38239 | 2.95998 |
| 74.58285 | 2.95941 |
| 74.78432 | 2.95791 |
| 74.98378 | 2.95741 |
| 75.18525 | 2.9583  |
| 75.38571 | 2.95661 |
| 75.58617 | 2.95777 |
| 75.78564 | 2.96103 |
| 75.98613 | 2.958   |
| 76.18663 | 2.9589  |
| 76.38704 | 2.96009 |
| 76.58651 | 2.96043 |
| 76.787   | 2.96292 |
| 76.98744 | 2.96353 |
| 77.1879  | 2.96039 |
| 77.38839 | 2.96421 |
| 77.58883 | 2.96107 |
| 77.78929 | 2.81325 |
| 77.98876 | 2.6398  |
| 78.19022 | 2.49255 |
| 78.39069 | 2.3727  |
| 78.59221 | 2.32512 |
| 78.79261 | 2.32513 |
| 78.99407 | 2.31979 |
| 79.19454 | 2.32009 |
| 79.39503 | 2.31308 |

|          |         |
|----------|---------|
| 79.59453 | 2.31676 |
| 79.79593 | 2.31806 |
| 79.99746 | 2.31622 |
| 80.19792 | 2.31632 |
| 80.39833 | 2.31475 |
| 80.59782 | 2.31331 |
| 80.79826 | 2.31366 |
| 80.99875 | 2.31301 |
| 81.20018 | 2.31498 |
| 81.40065 | 2.31274 |
| 81.60217 | 2.31331 |
| 81.80158 | 2.31104 |
| 82.00204 | 2.31374 |
| 82.20251 | 2.31186 |
| 82.40397 | 2.31004 |
| 82.60543 | 2.30982 |
| 82.80495 | 2.30584 |
| 83.00639 | 2.31081 |
| 83.20586 | 2.30983 |
| 83.40629 | 2.30949 |
| 83.60579 | 2.30532 |
| 83.80725 | 2.30957 |
| 84.00775 | 2.30676 |
| 84.20915 | 2.30703 |
| 84.40862 | 2.30503 |
| 84.61011 | 2.30495 |
| 84.80955 | 2.30707 |
| 85.01001 | 2.30392 |
| 85.21048 | 2.30316 |
| 85.41094 | 2.30263 |
| 85.6124  | 2.30436 |
| 85.8119  | 2.30038 |
| 86.01333 | 2.30425 |
| 86.2128  | 2.30243 |
| 86.41327 | 2.30221 |
| 86.61373 | 2.30065 |
| 86.81519 | 2.30478 |
| 87.01571 | 2.30188 |
| 87.21712 | 2.3002  |
| 87.41659 | 2.2987  |
| 87.61805 | 2.2994  |
| 87.81751 | 2.30359 |

|          |         |
|----------|---------|
| 88.01798 | 2.29888 |
| 88.21844 | 2.3     |
| 88.41794 | 2.30108 |
| 88.61843 | 2.29923 |
| 88.81784 | 2.30041 |
| 89.01837 | 2.30011 |
| 89.2178  | 2.297   |
| 89.41924 | 2.298   |
| 89.6197  | 2.29542 |
| 89.82117 | 2.29881 |
| 90.02063 | 2.29721 |
| 90.22209 | 2.29755 |
| 90.4216  | 2.29819 |
| 90.62302 | 2.29654 |
| 90.82349 | 2.29925 |
| 91.02395 | 2.29425 |
| 91.22541 | 2.297   |
| 91.42488 | 2.2982  |
| 91.62537 | 2.29705 |
| 91.82481 | 2.29535 |
| 92.02528 | 2.29552 |
| 92.22477 | 2.29543 |
| 92.42624 | 2.29523 |
| 92.62668 | 2.29679 |
| 92.82813 | 2.29387 |
| 93.02866 | 2.29641 |
| 93.22909 | 2.29378 |
| 93.42853 | 2.29536 |
| 93.62903 | 2.29649 |
| 93.82946 | 2.29366 |
| 94.02896 | 2.29567 |
| 94.23039 | 2.29543 |
| 94.42986 | 2.296   |
| 94.63032 | 2.29208 |
| 94.82982 | 2.29448 |
| 95.03125 | 2.29729 |
| 95.2308  | 2.29317 |
| 95.43125 | 2.29769 |
| 95.63068 | 2.29638 |
| 95.83214 | 2.29393 |
| 96.03264 | 2.29383 |
| 96.23404 | 2.29767 |

|          |         |
|----------|---------|
| 96.4355  | 2.30206 |
| 96.63599 | 2.29486 |
| 96.83649 | 2.29652 |
| 97.03595 | 2.29502 |
| 97.2364  | 2.29619 |
| 97.43583 | 2.29707 |
| 97.63735 | 2.29631 |
| 97.83776 | 2.29786 |
| 98.03825 | 2.28062 |
| 98.23769 | 1.84581 |
| 98.43815 | 1.56498 |
| 98.63862 | 1.44843 |
| 98.83908 | 1.18703 |
| 99.03855 | 0.82945 |
| 99.23902 | 0.52649 |
| 99.43948 | 0.43874 |
| 99.63898 | 0.35751 |
| 99.84041 | 0.28648 |
| 100.0399 | 0.21841 |
| 100.2413 | 0.19633 |
| 100.4418 | 0.19853 |
| 100.6433 | 0.19089 |
| 100.8438 | 0.19206 |
| 101.0443 | 0.18993 |
| 101.2437 | 0.18515 |
| 101.4441 | 0.18625 |
| 101.6436 | 0.18908 |
| 101.8452 | 0.18694 |
| 102.0465 | 0.18338 |
| 102.247  | 0.18357 |
| 102.4485 | 0.18292 |
| 102.6489 | 0.18059 |
| 102.8504 | 0.18356 |
| 103.0509 | 0.18724 |
| 103.2513 | 0.18435 |
| 103.4508 | 0.18798 |
| 103.6522 | 0.18563 |
| 103.8527 | 0.18475 |
| 104.0532 | 0.18177 |
| 104.2536 | 0.18063 |
| 104.4541 | 0.18701 |
| 104.6536 | 0.18261 |

|          |         |
|----------|---------|
| 104.854  | 0.18376 |
| 105.0555 | 0.18466 |
| 105.256  | 0.18209 |
| 105.4564 | 0.18351 |
| 105.6559 | 0.18312 |
| 105.8573 | 0.18188 |
| 106.0568 | 0.18153 |
| 106.2573 | 0.18085 |
| 106.4568 | 0.17651 |
| 106.6572 | 0.1809  |
| 106.8577 | 0.18399 |
| 107.0591 | 0.1803  |
| 107.2597 | 0.17586 |
| 107.4601 | 0.1794  |
| 107.6605 | 0.17855 |
| 107.86   | 0.17982 |
| 108.0605 | 0.17789 |
| 108.2599 | 0.18236 |
| 108.4604 | 0.18271 |
| 108.6609 | 0.17796 |
| 108.8623 | 0.18011 |
| 109.0618 | 0.17446 |
| 109.2623 | 0.18021 |
| 109.4627 | 0.18054 |
| 109.6642 | 0.17768 |
| 109.8637 | 0.18046 |
| 110.0641 | 0.17854 |
| 110.2636 | 0.1745  |
| 110.4642 | 0.17791 |
| 110.6656 | 0.17715 |
| 110.866  | 0.18099 |
| 111.0664 | 0.17569 |
| 111.2669 | 0.18174 |
| 111.4674 | 0.17849 |
| 111.6668 | 0.18004 |
| 111.8673 | 0.17866 |
| 112.0668 | 0.17683 |
| 112.2682 | 0.17576 |
| 112.4677 | 0.17419 |
| 112.6682 | 0.17623 |
| 112.8676 | 0.17845 |
| 113.0681 | 0.17747 |

|          |         |
|----------|---------|
| 113.2696 | 0.17558 |
| 113.47   | 0.17873 |
| 113.6715 | 0.17371 |
| 113.8709 | 0.17289 |
| 114.0724 | 0.17354 |
| 114.2729 | 0.17763 |
| 114.4733 | 0.1744  |
| 114.6728 | 0.17352 |
| 114.8743 | 0.17319 |
| 115.0737 | 0.18069 |
| 115.2742 | 0.17514 |
| 115.4737 | 0.17427 |
| 115.6741 | 0.17634 |
| 115.8736 | 0.17335 |
| 116.0751 | 0.17554 |
| 116.2765 | 0.17562 |
| 116.477  | 0.17714 |
| 116.6775 | 0.17654 |
| 116.8769 | 0.17954 |
| 117.0784 | 0.17474 |
| 117.2779 | 0.17576 |
| 117.4793 | 0.17873 |
| 117.6798 | 0.17582 |
| 117.8832 | 0.17798 |
| 118.0837 | 0.17577 |
| 118.2842 | 0.17643 |
| 118.4836 | 0.17769 |
| 118.6851 | 0.18012 |
| 118.8856 | 0.17409 |
| 119.085  | 0.17821 |
| 119.2855 | 0.17848 |
| 119.486  | 0.17661 |
| 119.6864 | 0.17627 |
| 119.8859 | 0.17109 |
| 120.0873 | 0.17625 |
| 120.2868 | 0.17763 |
| 120.4883 | 0.1825  |
| 120.6888 | 0.21425 |
| 120.8892 | 0.36828 |
| 121.0897 | 0.47783 |
| 121.2902 | 0.58354 |
| 121.4906 | 0.70704 |

|          |         |
|----------|---------|
| 121.6901 | 0.75442 |
| 121.8915 | 0.76996 |
| 122.091  | 0.78817 |
| 122.2925 | 0.81516 |
| 122.4919 | 0.81564 |
| 122.6934 | 0.81825 |
| 122.8939 | 0.81872 |
| 123.0954 | 0.82054 |
| 123.2958 | 0.8198  |
| 123.4973 | 0.81817 |
| 123.6968 | 0.82291 |
| 123.8982 | 0.82359 |
| 124.0986 | 0.82344 |
| 124.3001 | 0.82156 |
| 124.5016 | 0.82246 |
| 124.7011 | 0.82286 |
| 124.9025 | 0.82042 |
| 125.103  | 0.82363 |
| 125.3044 | 0.82572 |
| 125.5039 | 0.82338 |
| 125.7044 | 0.82156 |
| 125.9048 | 0.82347 |
| 126.1063 | 0.823   |
| 126.3058 | 0.82231 |
| 126.5063 | 0.82259 |
| 126.7067 | 0.82054 |
| 126.9082 | 0.82104 |
| 127.1086 | 0.81987 |
| 127.3091 | 0.82175 |
| 127.5105 | 0.82036 |
| 127.71   | 0.81927 |
| 127.9105 | 0.82008 |
| 128.1109 | 0.8208  |
| 128.3124 | 0.82124 |
| 128.5119 | 0.8203  |
| 128.7123 | 0.82059 |
| 128.9128 | 0.82232 |
| 129.1133 | 0.82234 |
| 129.3127 | 0.82475 |
| 129.5142 | 0.82434 |
| 129.7147 | 0.82439 |
| 129.9151 | 0.8273  |

|          |         |
|----------|---------|
| 130.1156 | 0.827   |
| 130.3161 | 0.82633 |
| 130.5175 | 0.83044 |
| 130.717  | 0.82902 |
| 130.9184 | 0.82881 |
| 131.1189 | 0.82805 |
| 131.3194 | 0.82843 |
| 131.5198 | 0.82815 |
| 131.7213 | 0.82821 |
| 131.9208 | 0.81727 |
| 132.1212 | 0.79537 |
| 132.3207 | 0.74498 |
| 132.5212 | 0.71595 |
| 132.7216 | 0.674   |
| 132.9221 | 0.638   |
| 133.1226 | 0.58871 |
| 133.322  | 0.55039 |
| 133.5235 | 0.53821 |
| 133.7239 | 0.53162 |
| 133.9254 | 0.52442 |
| 134.1249 | 0.51186 |
| 134.3253 | 0.50053 |
| 134.5248 | 0.50012 |
| 134.7263 | 0.50111 |
| 134.9267 | 0.50391 |
| 135.1272 | 0.5016  |
| 135.3267 | 0.50195 |
| 135.5272 | 0.50128 |
| 135.7276 | 0.5005  |
| 135.9281 | 0.49832 |
| 136.1295 | 0.5036  |
| 136.329  | 0.50231 |
| 136.5295 | 0.49993 |
| 136.7289 | 0.50013 |
| 136.9294 | 0.49959 |
| 137.1289 | 0.49997 |
| 137.3294 | 0.5018  |
| 137.5288 | 0.50197 |
| 137.7302 | 0.50142 |
| 137.9307 | 0.49909 |
| 138.1312 | 0.50072 |
| 138.3317 | 0.50391 |

|          |         |
|----------|---------|
| 138.5311 | 0.50119 |
| 138.7326 | 0.50375 |
| 138.932  | 0.50044 |
| 139.1325 | 0.50313 |
| 139.332  | 0.50371 |
| 139.5334 | 0.50296 |
| 139.7339 | 0.50439 |
| 139.9354 | 0.50346 |
| 140.1358 | 0.50298 |
| 140.3363 | 0.50565 |
| 140.5367 | 0.50618 |
| 140.7392 | 0.50397 |
| 140.9397 | 0.50335 |
| 141.1391 | 0.50505 |
| 141.3406 | 0.50628 |
| 141.5401 | 0.50274 |
| 141.7405 | 0.50394 |
| 141.94   | 0.50996 |
| 142.1415 | 0.50791 |
| 142.3409 | 0.50675 |
| 142.5414 | 0.50988 |
| 142.7409 | 0.50907 |
| 142.9413 | 0.50571 |
| 143.1408 | 0.50443 |
| 143.3423 | 0.51124 |
| 143.5428 | 0.50568 |
| 143.7442 | 0.50595 |
| 143.9447 | 0.51917 |
| 144.1461 | 0.77713 |
| 144.3466 | 1.22038 |
| 144.547  | 1.45265 |
| 144.7475 | 1.64778 |
| 144.948  | 2.00104 |
| 145.1494 | 2.3817  |
| 145.3489 | 2.56126 |
| 145.5504 | 2.57721 |
| 145.7508 | 2.58976 |
| 145.9523 | 2.59389 |
| 146.1518 | 2.60024 |
| 146.3523 | 2.60281 |
| 146.5527 | 2.60502 |
| 146.7521 | 2.6037  |

|          |         |
|----------|---------|
| 146.9526 | 2.60582 |
| 147.1521 | 2.61007 |
| 147.3535 | 2.60839 |
| 147.554  | 2.61015 |
| 147.7545 | 2.61036 |
| 147.9549 | 2.61528 |
| 148.1554 | 2.61214 |
| 148.3549 | 2.61546 |
| 148.5553 | 2.61593 |
| 148.7548 | 2.61314 |
| 148.9563 | 2.61737 |
| 149.1557 | 2.61301 |
| 149.3573 | 2.62039 |
| 149.5577 | 2.61741 |
| 149.7582 | 2.61527 |
| 149.9596 | 2.61846 |
| 150.1601 | 2.6195  |
| 150.3615 | 2.61898 |
| 150.562  | 2.62335 |
| 150.7624 | 2.61864 |
| 150.9619 | 2.61891 |
| 151.1624 | 2.62226 |
| 151.3618 | 2.6205  |
| 151.5623 | 2.62642 |
| 151.7618 | 2.62285 |
| 151.9632 | 2.62817 |
| 152.1638 | 2.6288  |
| 152.3652 | 2.62685 |
| 152.5657 | 2.62849 |
| 152.7661 | 2.62418 |
| 152.9666 | 2.62813 |
| 153.167  | 2.62615 |
| 153.3675 | 2.63065 |
| 153.5669 | 2.62673 |
| 153.7684 | 2.63139 |
| 153.9689 | 2.633   |
| 154.1693 | 2.63686 |
| 154.3698 | 2.63167 |
| 154.5713 | 2.63363 |
| 154.7707 | 2.63512 |
| 154.9722 | 2.63336 |
| 155.1727 | 2.63311 |

|          |         |
|----------|---------|
| 155.3732 | 2.63679 |
| 155.5736 | 2.63438 |
| 155.7741 | 2.62952 |
| 155.9756 | 2.61949 |
| 156.175  | 2.43597 |
| 156.3764 | 2.2454  |
| 156.5759 | 2.08228 |
| 156.7764 | 1.94374 |
| 156.9758 | 1.88677 |
| 157.1773 | 1.87603 |
| 157.3768 | 1.88155 |
| 157.5772 | 1.87231 |
| 157.7777 | 1.87377 |
| 157.9772 | 1.87079 |
| 158.1776 | 1.87038 |
| 158.3772 | 1.87064 |
| 158.5786 | 1.86943 |
| 158.778  | 1.87044 |
| 158.9795 | 1.86946 |
| 159.179  | 1.86978 |
| 159.3804 | 1.86362 |
| 159.5799 | 1.86747 |
| 159.7804 | 1.86548 |
| 159.9798 | 1.86537 |
| 160.1803 | 1.86061 |
| 160.3798 | 1.86761 |
| 160.5812 | 1.8659  |
| 160.7827 | 1.86327 |
| 160.9831 | 1.86373 |
| 161.1846 | 1.85996 |
| 161.3841 | 1.86343 |
| 161.5845 | 1.86249 |
| 161.784  | 1.86296 |
| 161.9855 | 1.86131 |
| 162.1849 | 1.86314 |
| 162.3864 | 1.86135 |
| 162.5869 | 1.86085 |
| 162.7873 | 1.86004 |
| 162.9878 | 1.8594  |
| 163.1883 | 1.86314 |
| 163.3887 | 1.8613  |
| 163.5882 | 1.86313 |

|          |         |
|----------|---------|
| 163.7887 | 1.85849 |
| 163.9881 | 1.85757 |
| 164.1886 | 1.85774 |
| 164.3881 | 1.85823 |
| 164.5895 | 1.85789 |
| 164.79   | 1.85808 |
| 164.9904 | 1.85802 |
| 165.1899 | 1.85765 |
| 165.3914 | 1.85665 |
| 165.5918 | 1.85969 |
| 165.7933 | 1.85689 |
| 165.9938 | 1.85944 |
| 166.1933 | 1.85934 |
| 166.3937 | 1.85792 |
| 166.5942 | 1.85715 |
| 166.7946 | 1.85761 |
| 166.9941 | 1.85621 |
| 167.1946 | 1.85674 |
| 167.394  | 1.85949 |
| 167.5945 | 1.85735 |
| 167.795  | 1.85976 |
| 167.9964 | 1.85916 |
| 168.1959 | 1.85799 |
| 168.3973 | 1.85965 |
| 168.5969 | 1.85887 |
| 168.7983 | 1.85588 |
| 168.9987 | 1.85784 |
| 169.1982 | 1.85684 |
| 169.3987 | 1.85766 |
| 169.5992 | 1.85665 |
| 169.7996 | 1.857   |
| 170.0011 | 1.85476 |
| 170.2015 | 1.85776 |
| 170.402  | 1.85651 |
| 170.6025 | 1.85935 |
| 170.8029 | 1.85503 |
| 171.0044 | 1.85794 |
| 171.2039 | 1.85891 |
| 171.4043 | 1.86055 |
| 171.6058 | 1.85572 |
| 171.8052 | 1.86163 |
| 172.0067 | 1.85717 |

|          |         |
|----------|---------|
| 172.2072 | 1.8593  |
| 172.4086 | 1.8596  |
| 172.6091 | 1.85745 |
| 172.8106 | 1.85891 |
| 173.01   | 1.86054 |
| 173.2105 | 1.86424 |
| 173.41   | 1.8628  |
| 173.6115 | 1.85916 |
| 173.8119 | 1.86154 |
| 174.0134 | 1.86302 |
| 174.2138 | 1.86601 |
| 174.4143 | 1.86446 |
| 174.6147 | 1.86623 |
| 174.8152 | 1.86744 |
| 175.0157 | 1.86461 |
| 175.2162 | 1.86183 |
| 175.4166 | 1.85987 |
| 175.6171 | 1.69465 |
| 175.8185 | 1.43006 |
| 176.018  | 1.27369 |
| 176.2195 | 1.15883 |
| 176.4199 | 0.97737 |
| 176.6214 | 0.68097 |
| 176.8209 | 0.53548 |
| 177.0223 | 0.43366 |
| 177.2228 | 0.37409 |
| 177.4232 | 0.36325 |
| 177.6237 | 0.36079 |
| 177.8232 | 0.35971 |
| 178.0246 | 0.36085 |
| 178.2241 | 0.35502 |
| 178.4256 | 0.32248 |
| 178.625  | 0.30864 |
| 178.8255 | 0.31443 |
| 179.026  | 0.31093 |
| 179.2274 | 0.30868 |
| 179.428  | 0.30778 |
| 179.6294 | 0.30418 |
| 179.8298 | 0.31026 |
| 180.0293 | 0.30871 |
| 180.2298 | 0.30502 |
| 180.4303 | 0.30385 |

|          |         |
|----------|---------|
| 180.6317 | 0.30614 |
| 180.8311 | 0.30762 |
| 181.0316 | 0.30575 |
| 181.2311 | 0.30692 |
| 181.4326 | 0.30708 |
| 181.633  | 0.30505 |
| 181.8335 | 0.30329 |
| 182.0329 | 0.30869 |
| 182.2334 | 0.3064  |
| 182.4339 | 0.3068  |
| 182.6343 | 0.30475 |
| 182.8348 | 0.30416 |
| 183.0353 | 0.30544 |
| 183.2358 | 0.30368 |
| 183.4362 | 0.30015 |
| 183.6367 | 0.30495 |
| 183.8372 | 0.30153 |
| 184.0376 | 0.30095 |
| 184.2381 | 0.30043 |
| 184.4395 | 0.2996  |
| 184.639  | 0.29814 |
| 184.8394 | 0.29862 |
| 185.0389 | 0.30168 |
| 185.2394 | 0.29955 |
| 185.4398 | 0.30021 |
| 185.6413 | 0.29909 |
| 185.8418 | 0.30002 |
| 186.0423 | 0.2988  |
| 186.2437 | 0.29679 |
| 186.4432 | 0.29808 |
| 186.6437 | 0.30064 |
| 186.8431 | 0.29854 |
| 187.0446 | 0.2961  |
| 187.244  | 0.2992  |
| 187.4445 | 0.30054 |
| 187.644  | 0.2974  |
| 187.8454 | 0.29937 |
| 188.0459 | 0.29905 |
| 188.2464 | 0.29762 |
| 188.4468 | 0.29618 |
| 188.6473 | 0.29978 |
| 188.8487 | 0.29696 |

|          |         |
|----------|---------|
| 189.0492 | 0.29704 |
| 189.2507 | 0.29624 |
| 189.4511 | 0.29461 |
| 189.6526 | 0.29595 |
| 189.8531 | 0.29765 |
| 190.0535 | 0.29408 |
| 190.253  | 0.29616 |
| 190.4544 | 0.29422 |
| 190.6549 | 0.29677 |
| 190.8564 | 0.29489 |
| 191.0568 | 0.2975  |
| 191.2564 | 0.29712 |
| 191.4578 | 0.29717 |
| 191.6582 | 0.29761 |
| 191.8597 | 0.29572 |
| 192.0592 | 0.29617 |
| 192.2597 | 0.29924 |
| 192.4591 | 0.29689 |
| 192.6606 | 0.29617 |
| 192.86   | 0.29728 |
| 193.0605 | 0.30136 |
| 193.26   | 0.29785 |
| 193.4614 | 0.29834 |
| 193.6619 | 0.29741 |
| 193.8623 | 0.30201 |
| 194.0638 | 0.2981  |
| 194.2633 | 0.29952 |
| 194.4647 | 0.30024 |
| 194.6642 | 0.30341 |
| 194.8657 | 0.30121 |
| 195.0651 | 0.30006 |
| 195.2666 | 0.30231 |
| 195.4671 | 0.30388 |
| 195.6675 | 0.30388 |
| 195.868  | 0.30129 |
| 196.0685 | 0.30069 |
| 196.2689 | 0.30442 |
| 196.4704 | 0.30505 |
| 196.6708 | 0.30632 |
| 196.8703 | 0.31066 |
| 197.0708 | 0.37202 |
| 197.2712 | 0.50766 |

|          |         |
|----------|---------|
| 197.4717 | 0.59226 |
| 197.6722 | 0.69115 |
| 197.8736 | 0.77243 |
| 198.0741 | 0.86568 |
| 198.2756 | 0.90403 |
| 198.475  | 0.90572 |
| 198.6765 | 0.90448 |
| 198.876  | 0.90567 |
| 199.0765 | 0.90563 |
| 199.2759 | 0.90517 |
| 199.4774 | 0.90997 |
| 199.6778 | 0.90553 |
| 199.8773 | 0.91024 |
| 200.0788 | 0.90584 |
| 200.2792 | 0.9064  |
| 200.4797 | 0.90995 |
| 200.6791 | 0.90684 |
| 200.8806 | 0.90794 |
| 201.0811 | 0.90294 |
| 201.2825 | 0.90513 |
| 201.483  | 0.90721 |
| 201.6835 | 0.90966 |
| 201.8829 | 0.90675 |
| 202.0844 | 0.90864 |
| 202.2859 | 0.90934 |
| 202.4863 | 0.90674 |
| 202.6878 | 0.90628 |
| 202.8873 | 0.90469 |
| 203.0887 | 0.90529 |
| 203.2892 | 0.90345 |
| 203.4897 | 0.90628 |
| 203.6891 | 0.90449 |
| 203.8906 | 0.9067  |
| 204.091  | 0.90781 |
| 204.2925 | 0.90569 |
| 204.493  | 0.90507 |
| 204.6935 | 0.90637 |
| 204.8949 | 0.9027  |
| 205.0944 | 0.90309 |
| 205.2948 | 0.90777 |
| 205.4953 | 0.90632 |
| 205.6958 | 0.90767 |

|          |         |
|----------|---------|
| 205.8952 | 0.90502 |
| 206.0957 | 0.90995 |
| 206.2952 | 0.90752 |
| 206.4966 | 0.90495 |
| 206.6971 | 0.90716 |
| 206.8985 | 0.95371 |
| 207.098  | 1.12316 |
| 207.2985 | 1.17829 |
| 207.4989 | 1.18168 |
| 207.6994 | 1.18973 |
| 207.9009 | 1.18602 |
| 208.1004 | 1.1854  |
| 208.3018 | 1.18732 |
| 208.5033 | 1.18699 |
| 208.7047 | 1.18793 |
| 208.9042 | 1.19218 |
| 209.1056 | 1.19201 |
| 209.3051 | 1.19003 |
| 209.5066 | 1.18973 |
| 209.707  | 1.18921 |
| 209.9075 | 1.18855 |
| 210.107  | 1.18931 |
| 210.3074 | 1.19014 |
| 210.5079 | 1.19277 |
| 210.7074 | 1.19148 |
| 210.9079 | 1.19195 |
| 211.1074 | 1.19143 |
| 211.3088 | 1.18904 |
| 211.5083 | 1.18647 |
| 211.7087 | 1.18759 |
| 211.9082 | 1.19049 |
| 212.1086 | 1.18899 |
| 212.3081 | 1.192   |
| 212.5096 | 1.18917 |
| 212.7101 | 1.18893 |
| 212.9115 | 1.19092 |
| 213.1119 | 1.18845 |
| 213.3134 | 1.19377 |
| 213.5129 | 1.19365 |
| 213.7143 | 1.19486 |
| 213.9148 | 1.19382 |
| 214.1143 | 1.1922  |

|          |         |
|----------|---------|
| 214.3149 | 1.1962  |
| 214.5143 | 1.19621 |
| 214.7157 | 1.19395 |
| 214.9162 | 1.19651 |
| 215.1176 | 1.19336 |
| 215.3171 | 1.191   |
| 215.5185 | 1.19178 |
| 215.718  | 1.19472 |
| 215.9185 | 1.19288 |
| 216.1199 | 1.19266 |
| 216.3194 | 1.1939  |
| 216.5199 | 1.19271 |
| 216.7193 | 1.19688 |
| 216.9208 | 1.19904 |
| 217.1212 | 1.19215 |
| 217.3227 | 1.19239 |
| 217.5222 | 1.19647 |
| 217.7237 | 1.19495 |
| 217.9231 | 1.19581 |
| 218.1236 | 1.19397 |
| 218.323  | 1.19619 |
| 218.5245 | 1.19743 |
| 218.724  | 1.19803 |
| 218.9254 | 1.33049 |
| 219.1269 | 1.47435 |
| 219.3274 | 1.80663 |
| 219.5278 | 1.85833 |
| 219.7273 | 1.86491 |
| 219.9288 | 1.86753 |
| 220.1283 | 1.86883 |
| 220.3287 | 1.86952 |
| 220.5291 | 1.87023 |
| 220.7296 | 1.87107 |
| 220.9291 | 1.8732  |
| 221.1305 | 1.87478 |
| 221.331  | 1.87542 |
| 221.5315 | 1.87449 |
| 221.7319 | 1.8763  |
| 221.9324 | 1.87702 |
| 222.1329 | 1.87225 |
| 222.3323 | 1.87715 |
| 222.5328 | 1.88    |

|          |         |
|----------|---------|
| 222.7323 | 1.87892 |
| 222.9327 | 1.87806 |
| 223.1322 | 1.879   |
| 223.3327 | 1.88048 |
| 223.5331 | 1.88154 |
| 223.7337 | 1.88095 |
| 223.9331 | 1.88442 |
| 224.1336 | 1.89079 |
| 224.333  | 1.88815 |
| 224.5334 | 1.88892 |
| 224.7349 | 1.8895  |
| 224.9354 | 1.88525 |
| 225.1358 | 1.88695 |
| 225.3363 | 1.88792 |
| 225.5378 | 1.88742 |
| 225.7372 | 1.88964 |
| 225.9387 | 1.88776 |
| 226.1392 | 1.88396 |
| 226.3406 | 1.88493 |
| 226.5411 | 1.88543 |
| 226.7416 | 1.88736 |
| 226.942  | 1.88534 |
| 227.1435 | 1.8851  |
| 227.3439 | 1.88019 |
| 227.5444 | 1.88225 |
| 227.7459 | 1.88644 |
| 227.9453 | 1.88596 |
| 228.1468 | 1.88582 |
| 228.3463 | 1.88728 |
| 228.5467 | 1.88543 |
| 228.7472 | 1.88847 |
| 228.9477 | 1.88656 |
| 229.1481 | 1.88392 |
| 229.3496 | 1.88651 |
| 229.5491 | 1.88738 |
| 229.7496 | 1.88526 |
| 229.95   | 1.88812 |
| 230.1495 | 1.88467 |
| 230.3509 | 1.88588 |
| 230.5514 | 1.8869  |
| 230.7528 | 1.8891  |
| 230.9533 | 1.88849 |

|          |         |
|----------|---------|
| 231.1548 | 1.92667 |
| 231.3552 | 2.06328 |
| 231.5567 | 2.13853 |
| 231.7572 | 2.19015 |
| 231.9587 | 2.22131 |
| 232.1581 | 2.28919 |
| 232.3596 | 2.30089 |
| 232.559  | 2.305   |
| 232.7595 | 2.30935 |
| 232.961  | 2.31095 |
| 233.1614 | 2.31694 |
| 233.3629 | 2.31582 |
| 233.5633 | 2.31968 |
| 233.7648 | 2.3211  |
| 233.9653 | 2.3201  |
| 234.1657 | 2.32368 |
| 234.3652 | 2.32683 |
| 234.5667 | 2.32032 |
| 234.7661 | 2.32226 |
| 234.9666 | 2.32186 |
| 235.1661 | 2.32102 |
| 235.3675 | 2.32123 |
| 235.568  | 2.32495 |
| 235.7684 | 2.32312 |
| 235.969  | 2.32085 |
| 236.1684 | 2.32376 |
| 236.3688 | 2.32549 |
| 236.5683 | 2.32183 |
| 236.7688 | 2.32183 |
| 236.9683 | 2.32964 |
| 237.1697 | 2.32605 |
| 237.3702 | 2.32377 |
| 237.5706 | 2.32136 |
| 237.7701 | 2.32222 |
| 237.9716 | 2.32376 |
| 238.172  | 2.32523 |
| 238.3725 | 2.32282 |
| 238.573  | 2.32742 |
| 238.7734 | 2.32435 |
| 238.9739 | 2.32074 |
| 239.1744 | 2.32341 |
| 239.3748 | 2.32874 |

|          |         |
|----------|---------|
| 239.5743 | 2.32635 |
| 239.7748 | 2.32771 |
| 239.9742 | 2.3296  |
| 240.1757 | 2.33171 |
| 240.3751 | 2.33189 |
| 240.5766 | 2.33436 |
| 240.7761 | 2.33345 |
| 240.9775 | 2.33154 |
| 241.178  | 2.334   |
| 241.3785 | 2.33313 |
| 241.58   | 2.33304 |
| 241.7804 | 2.33316 |
| 241.9809 | 2.33533 |
| 242.1804 | 2.3332  |
| 242.3808 | 2.33379 |
| 242.5803 | 2.33019 |
| 242.7817 | 2.33315 |
| 242.9812 | 2.32969 |
| 243.1827 | 2.33411 |
| 243.3831 | 2.33463 |
| 243.5836 | 2.33453 |
| 243.783  | 2.3349  |
| 243.9845 | 2.33611 |
| 244.185  | 2.33502 |
| 244.3854 | 2.33665 |
| 244.5859 | 2.3293  |
| 244.7864 | 2.33267 |
| 244.9868 | 2.33423 |
| 245.1864 | 2.33439 |
| 245.3878 | 2.33811 |
| 245.5883 | 2.33584 |
| 245.7897 | 2.3377  |
| 245.9892 | 2.33713 |
| 246.1906 | 2.3359  |
| 246.3911 | 2.33503 |
| 246.5916 | 2.33432 |
| 246.793  | 2.33263 |
| 246.9925 | 2.33603 |
| 247.1939 | 2.33409 |
| 247.3935 | 2.33189 |
| 247.5949 | 2.33477 |
| 247.7944 | 2.33129 |

|          |         |
|----------|---------|
| 247.9948 | 2.33032 |
| 248.1953 | 2.33365 |
| 248.3958 | 2.32853 |
| 248.5952 | 2.32959 |
| 248.7957 | 2.32999 |
| 248.9951 | 2.33512 |
| 249.1966 | 2.32922 |
| 249.3971 | 2.33286 |
| 249.5966 | 2.33222 |
| 249.797  | 2.33326 |
| 249.9965 | 2.32751 |
| 250.1979 | 2.33079 |
| 250.3974 | 2.32899 |
| 250.5988 | 2.33293 |
| 250.7983 | 2.33108 |
| 250.9988 | 2.33114 |
| 251.1982 | 2.33363 |
| 251.3997 | 2.33257 |
| 251.5992 | 2.33529 |
| 251.7996 | 2.33508 |
| 252.0001 | 2.33554 |
| 252.2016 | 2.3068  |
| 252.403  | 1.85094 |
| 252.6025 | 1.60749 |
| 252.803  | 1.208   |
| 253.0024 | 0.86417 |
| 253.2039 | 0.6766  |
| 253.4044 | 0.39713 |
| 253.6048 | 0.12336 |
| 253.8053 | 0.02977 |
| 254.0058 | 0.00995 |
| 254.2062 | 0.00692 |
| 254.4077 | 0.00975 |
| 254.6081 | 0.01064 |
| 254.8086 | 0.00854 |
| 255.0091 | 0.00819 |
| 255.2096 | 0.00551 |
| 255.41   | 0.00631 |
| 255.6095 | 0.00964 |
| 255.8109 | 0.00967 |
| 256.0104 | 0.00883 |
| 256.2109 | 0.00944 |

|          |         |
|----------|---------|
| 256.4113 | 0.01025 |
| 256.6118 | 0.00735 |
| 256.8123 | 0.0086  |
| 257.0127 | 0.00973 |
| 257.2122 | 0.00744 |
| 257.4136 | 0.00625 |
| 257.6141 | 0.00884 |
| 257.8156 | 0.0042  |
| 258.017  | 0.00833 |
| 258.2175 | 0.00795 |
| 258.419  | 0.005   |
| 258.6184 | 0.00566 |
| 258.8199 | 0.00584 |
| 259.0194 | 0.00974 |
| 259.2208 | 0.00918 |
| 259.4203 | 0.00642 |
| 259.6218 | 0.00778 |
| 259.8212 | 0.00773 |
| 260.0217 | 0.0058  |
| 260.2222 | 0.0065  |
| 260.4236 | 0.00765 |
| 260.6251 | 0.00729 |
| 260.8255 | 0.00719 |
| 261.026  | 0.00554 |
| 261.2255 | 0.01008 |
| 261.426  | 0.00833 |
| 261.6254 | 0.00779 |
| 261.8259 | 0.00563 |
| 262.0253 | 0.00817 |
| 262.2268 | 0.01021 |
| 262.4263 | 0.00949 |
| 262.6267 | 0.0107  |
| 262.8272 | 0.01385 |
| 263.0277 | 0.01377 |
| 263.2281 | 0.01014 |
| 263.4286 | 0.01486 |
| 263.6301 | 0.01102 |
| 263.8295 | 0.01305 |
| 264.03   | 0.01171 |

|          |         |
|----------|---------|
| 264.2305 | 0.01149 |
| 264.4309 | 0.01287 |
| 264.6304 | 0.01552 |
| 264.8308 | 0.0149  |
| 265.0303 | 0.00943 |
| 265.2308 | 0.01229 |
| 265.4302 | 0.01531 |
| 265.6307 | 0.01418 |
| 265.8302 | 0.01525 |
| 266.0306 | 0.01134 |
| 266.2311 | 0.01259 |
| 266.4306 | 0.01357 |
| 266.632  | 0.00823 |
| 266.8325 | 0.0098  |
| 267.033  | 0.01223 |
| 267.2344 | 0.0097  |
| 267.4359 | 0.01027 |
| 267.6364 | 0.00982 |
| 267.8378 | 0.01092 |
| 268.0373 | 0.01181 |
| 268.2387 | 0.01387 |
| 268.4382 | 0.009   |
| 268.6397 | 0.00911 |
| 268.8401 | 0.0128  |
| 269.0406 | 0.01042 |
| 269.2411 | 0.01401 |
| 269.4415 | 0.01067 |
| 269.642  | 0.00868 |
| 269.8415 | 0.00862 |
| 270.0419 | 0.00783 |
| 270.2425 | 0.00933 |
| 270.4439 | 0.01083 |
| 270.6443 | 0.00612 |
| 270.8448 | 0.0064  |
| 271.0443 | 0.0075  |
| 271.2447 | 0.00786 |
| 271.4442 | 0.01034 |
| 271.6456 | 0.01081 |
| 271.8471 | 0.00678 |

|          |         |
|----------|---------|
| 272.0476 | 0.01167 |
| 272.249  | 0.00914 |
| 272.4485 | 0.01147 |
| 272.649  | 0.01053 |
| 272.8484 | 0.01209 |
| 273.0499 | 0.0127  |
| 273.2504 | 0.01166 |
| 273.4508 | 0.01343 |
| 273.6503 | 0.01234 |
| 273.8518 | 0.0151  |
| 274.0522 | 0.01119 |
| 274.2537 | 0.01321 |
| 274.4541 | 0.01243 |
| 274.6536 | 0.01245 |
| 274.8551 | 0.01226 |
| 275.0555 | 0.01277 |
| 275.257  | 0.01603 |
| 275.4565 | 0.01237 |
| 275.6569 | 0.01475 |
| 275.8564 | 0.01295 |
| 276.0569 | 0.00922 |
| 276.2564 | 0.01257 |
| 276.4568 | 0.01238 |
| 276.6573 | 0.01175 |
| 276.8577 | 0.01142 |
| 277.0572 | 0.01412 |
| 277.2587 | 0.01078 |
| 277.4601 | 0.01679 |
| 277.6596 | 0.01066 |
| 277.861  | 0.01312 |
| 278.0615 | 0.01044 |
| 278.262  | 0.01177 |
| 278.4615 | 0.01204 |
| 278.6619 | 0.01409 |
| 278.8614 | 0.01235 |
| 279.0628 | 0.0133  |
| 279.2633 | 0.01215 |
| 279.4638 | 0.00964 |
| 279.6632 | 0.00943 |

|          |         |
|----------|---------|
| 279.8647 | 0.0087  |
| 280.0652 | 0.0142  |
| 280.2656 | 0.01355 |
| 280.4661 | 0.0129  |
| 280.6656 | 0.01112 |
| 280.867  | 0.01137 |
| 281.0675 | 0.01344 |
| 281.268  | 0.00835 |
| 281.4674 | 0.01202 |
| 281.6679 | 0.01325 |
| 281.8683 | 0.01101 |
| 282.0688 | 0.0102  |
| 282.2693 | 0.00918 |
| 282.4707 | 0.00727 |
| 282.6702 | 0.0091  |
| 282.8717 | 0.00961 |
| 283.0722 | 0.00738 |
| 283.2716 | 0.00589 |
| 283.4731 | 0.01048 |
| 283.6735 | 0.00663 |
| 283.875  | 0.00622 |
| 284.0755 | 0.00832 |
| 284.277  | 0.00494 |
| 284.4774 | 0.00776 |
| 284.6788 | 0.00952 |
| 284.8793 | 0.00843 |
| 285.0798 | 0.00998 |
| 285.2802 | 0.00867 |
| 285.4817 | 0.00914 |
| 285.6822 | 0.0051  |
| 285.8826 | 0.00546 |
| 286.0832 | 0.00662 |
| 286.2826 | 0.00724 |
| 286.484  | 0.00719 |
| 286.6845 | 0.00735 |
| 286.886  | 0.00615 |
| 287.0864 | 0.00842 |
| 287.2879 | 0.01335 |
| 287.4873 | 0.00636 |

|          |          |
|----------|----------|
| 287.6878 | 0.00719  |
| 287.8883 | 0.00719  |
| 288.0897 | 0.00711  |
| 288.2892 | 0.00681  |
| 288.4907 | 0.00751  |
| 288.6912 | 0.00901  |
| 288.8906 | 0.00729  |
| 289.0921 | 0.00607  |
| 289.2925 | 0.00167  |
| 289.494  | 0.01087  |
| 289.6935 | 0.00764  |
| 289.8949 | 0.01173  |
| 290.0954 | 0.00624  |
| 290.2968 | 0.01013  |
| 290.4973 | 0.01119  |
| 290.6978 | 0.00942  |
| 290.8972 | 0.01466  |
| 291.0987 | 0.01526  |
| 291.3002 | 0.01631  |
| 291.5006 | 0.01716  |
| 291.7021 | 0.01186  |
| 291.9036 | 0.01333  |
| 292.105  | 0.00514  |
| 292.3045 | 0.00743  |
| 292.5049 | 0.00576  |
| 292.7054 | 9.55E-04 |
| 292.9069 | 0.0039   |
| 293.1073 | 0.00353  |
| 293.3088 | 0.00199  |
| 293.5093 | 0.00195  |
| 293.7107 | 0.00422  |
| 293.9112 | 5.15E-04 |
| 294.1117 | 2.13E-04 |
| 294.3131 | 0        |
